# Supplementary material for: Dynamic accessibility by car to tertiary care emergency services in Cali, Colombia, in 2020: cross-sectional equity analyses using travel time big data from a Google API
Source: PubMed Central journal article supplement — BMJ Open. 2022 Sep 1;12(9):e062178. doi: 10.1136/bmjopen-2022-062178 (PMC9438204; doi:10.1136/bmjopen-2022-062178), 2022-09-01
Supplement: bmjopen-2022-062178.draft_revisions.pdf [file bmjopen-2022-062178.draft_revisions.pdf]

# BMJ Open

BMJ Open is committed to open peer review. As part of this commitment we make the peer review history of every article we publish publicly available.

When an article is published we post the peer reviewers' comments and the authors' responses online. We also post the versions of the paper that were used during peer review. These are the versions that the peer review comments apply to.

The versions of the paper that follow are the versions that were submitted during the peer review process. They are not the versions of record or the final published versions. They should not be cited or distributed as the published version of this manuscript.

BMJ Open is an open access journal and the full, final, typeset and author-corrected version of record of the manuscript is available on our site with no access controls, subscription charges or pay-per-view fees (<http://bmjopen.bmj.com>).

If you have any questions on BMJ Open's open peer review process please email [info.bmjopen@bmj.com](mailto:info.bmjopen@bmj.com)

# BMJ Open

## Cross-sectional equity analysis of accessibility by automobile to tertiary care emergency services in Cali, Colombia, in 2020

|                               |                                                                                                                                                                                                                                                                                                                                                                                                                                                                                                                                                                                                                                                                                                                                                                                                                                                                                                                                                                                                                                                               |
|-------------------------------|---------------------------------------------------------------------------------------------------------------------------------------------------------------------------------------------------------------------------------------------------------------------------------------------------------------------------------------------------------------------------------------------------------------------------------------------------------------------------------------------------------------------------------------------------------------------------------------------------------------------------------------------------------------------------------------------------------------------------------------------------------------------------------------------------------------------------------------------------------------------------------------------------------------------------------------------------------------------------------------------------------------------------------------------------------------|
| Journal:                      | <i>BMJ Open</i>                                                                                                                                                                                                                                                                                                                                                                                                                                                                                                                                                                                                                                                                                                                                                                                                                                                                                                                                                                                                                                               |
| Manuscript ID                 | bmjopen-2022-062178                                                                                                                                                                                                                                                                                                                                                                                                                                                                                                                                                                                                                                                                                                                                                                                                                                                                                                                                                                                                                                           |
| Article Type:                 | Original research                                                                                                                                                                                                                                                                                                                                                                                                                                                                                                                                                                                                                                                                                                                                                                                                                                                                                                                                                                                                                                             |
| Date Submitted by the Author: | 07-Mar-2022                                                                                                                                                                                                                                                                                                                                                                                                                                                                                                                                                                                                                                                                                                                                                                                                                                                                                                                                                                                                                                                   |
| Complete List of Authors:     | <p>Cuervo, Luis Gabriel; Universitat Autònoma de Barcelona, Department of Paediatrics, Obstetrics &amp; Gynaecology and Preventative Medicine<br/> Martinez-Herrera, Eliana; Universidad de Antioquia, Facultad Nacional de Salud Pública<br/> Osorio, Lyda; Universidad del Valle Facultad de Salud, Escuela de Salud Pública<br/> Hatcher-Roberts, Janet; University of Ottawa Faculty of Medicine, School of Epidemiology and Public Health; Bruyere Research Institute<br/> Cuervo, Daniel; IQartil SAS<br/> Bula, Maria Olga; Egis Consulting<br/> Pinilla, Luis Fernando; Universidad de La Sabana, Correct email is LuisFerPinilla@gmail.com (system does not allow fixing it)<br/> Piquero, Felipe; Consumer advocate; Author of "Opportunities Amidst Uncertainty: My life with one kidney and without it", Published in English and Spanish<br/> Jaramillo, Ciro; Universidad del Valle, School of Civil and Geomatic Engineering<br/> Collaborative Group, AMORE Project; AMORE Project Collaborative Group; Universitat Autònoma de Barcelona</p> |
| Keywords:                     | Health policy < HEALTH SERVICES ADMINISTRATION & MANAGEMENT, ACCIDENT & EMERGENCY MEDICINE, Quality in health care < HEALTH SERVICES ADMINISTRATION & MANAGEMENT, Organisation of health services < HEALTH SERVICES ADMINISTRATION & MANAGEMENT, PUBLIC HEALTH, HEALTH SERVICES ADMINISTRATION & MANAGEMENT                                                                                                                                                                                                                                                                                                                                                                                                                                                                                                                                                                                                                                                                                                                                                   |
|                               |                                                                                                                                                                                                                                                                                                                                                                                                                                                                                                                                                                                                                                                                                                                                                                                                                                                                                                                                                                                                                                                               |

SCHOLARONE™  
Manuscripts

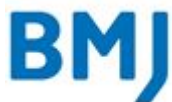

I, the Submitting Author has the right to grant and does grant on behalf of all authors of the Work (as defined in the below author licence), an exclusive licence and/or a non-exclusive licence for contributions from authors who are: i) UK Crown employees; ii) where BMJ has agreed a CC-BY licence shall apply, and/or iii) in accordance with the terms applicable for US Federal Government officers or employees acting as part of their official duties; on a worldwide, perpetual, irrevocable, royalty-free basis to BMJ Publishing Group Ltd ("BMJ") its licensees and where the relevant Journal is co-owned by BMJ to the co-owners of the Journal, to publish the Work in this journal and any other BMJ products and to exploit all rights, as set out in our [licence](#).

The Submitting Author accepts and understands that any supply made under these terms is made by BMJ to the Submitting Author unless you are acting as an employee on behalf of your employer or a postgraduate student of an affiliated institution which is paying any applicable article publishing charge ("APC") for Open Access articles. Where the Submitting Author wishes to make the Work available on an Open Access basis (and intends to pay the relevant APC), the terms of reuse of such Open Access shall be governed by a Creative Commons licence – details of these licences and which [Creative Commons](#) licence will apply to this Work are set out in our licence referred to above.

Other than as permitted in any relevant BMJ Author's Self Archiving Policies, I confirm this Work has not been accepted for publication elsewhere, is not being considered for publication elsewhere and does not duplicate material already published. I confirm all authors consent to publication of this Work and authorise the granting of this licence.

## Title

### Cross-sectional equity analysis of accessibility by automobile to tertiary care emergency services in Cali, Colombia, in 2020

Luis Gabriel CUERVO,<sup>(1)</sup> Eliana MARTINEZ HERRERA,<sup>(2)</sup> Lyda OSORIO,<sup>(3)</sup> Janet HATCHER ROBERTS,<sup>(4)</sup> Daniel CUERVO,<sup>(5)</sup> María Olga BULA,<sup>(6)</sup> Luis Fernando PINILLA,<sup>(7)</sup> Felipe PIQUERO,<sup>(8)</sup> Ciro JARAMILLO,<sup>(9)</sup> on behalf of the AMORE Project Collaboration.

(1) Corresponding author. PhD Candidate, Universitat Autònoma de Barcelona, Spain: [LuisGabriel.Cuervo@autonoma.cat](mailto:LuisGabriel.Cuervo@autonoma.cat)

(2) Faculty at the National School of Public Health, Universidad de Antioquia, Medellín, Colombia

(3) Faculty, School of Public Health, Universidad del Valle, Colombia.

(4) Brüyere Research Institute and Adjunct School of Epidemiology and Public Health, University of Ottawa.

(5) Partner at Iquartil SAS. Industrial Engineer, MBA, Certified Data Analyst.

(6) MSc in urban planning, Egis Consulting.

(7) Universidad de la Sabana. Lecturer in the Operations Management Specialization.

(8) Attorney in administrative law and healthcare legislation. Consumer advocate and book author

(9) Associate Professor in the School of Civil and Geomatic Engineering, Universidad del Valle, Colombia; PhD thesis director, Universitat Autònoma de Barcelona.

## Abstract

**Objectives:** Assess accessibility to tertiary care emergency services during free-flow and peak traffic congestion.

**Setting and Participants:** the registered population in Cali, Colombia (2.258 million) according to travel times obtained in July and November 2020.

**Primary and secondary outcomes:** travel times from the registered zone of residence to the nearest tertiary care emergency department.

**Results:** This study shows that traffic congestion sharply reduces accessibility to tertiary emergency care, with the greatest impact falling on specific ethnic groups, people with less educational attainment, and those living in low-income households or on the periphery of Cali. These populations face longer average travel times to health services than the average population, increasing their risk of worse outcomes. Differences in geographic accessibility to health services can lead to health inequities that hide in plain sight. New technologies can reveal these inequities by integrating sociodemographic data with accurate estimates of travel times to health services.

**Conclusions:** This study argues for prioritizing travel time over distance when planning for health services and land use. This study presents a new approach to health services and land-use planning that merits testing by concerned stakeholders. This approach delivers simple metrics, such as travel times to the nearest health service, that is easy for relevant stakeholders to share and interpret to spur intersectoral action.



- **What is already known on this topic** – dynamic travel times are not yet systematically integrated into urban and service planning; static spatial analyses fail to reflect reality; accessibility to health services is a determinant of health.
- **What this study adds** – simple metrics that all concerned stakeholders can interpret directly; a reference that considers traffic congestion dynamics and equity analysis of accessibility; a new hypothesis for other studies addressing health inequities.
- **How this study might affect research, practice, or policy** – by incentivizing the integration of dynamic travel times in plans and surveys that define land-use and health services planning.

## Introduction

### Background/rationale

Every minute counts in life-threatening emergencies (e.g., important blood vessel obstructions or ruptures, airway obstructions, asphyxiation or drowning, severe trauma, serious wounds) that do not leave time for referrals. The wellbeing of patients depends on getting immediate attention in a tertiary care facility. These facilities provide subspecialized care and access to highly trained personnel, sophisticated surgical theatres and intensive care.

This study delivers a baseline assessment of accessibility by automobile to such services in Cali, Colombia. This study assessed traffic congestion for Cali residents traveling by automobile (private or for-hire), which is how residents typically reach tertiary care facilities in emergencies.

Accessibility is a dynamic spatial attribute measured as the travel time needed to reach a health service from the origin of the demand.<sup>1-7</sup> It is dynamic because it changes as travel times fluctuate with traffic congestion. Poor accessibility is a recognized barrier to health equity that has until now been difficult to study and monitor.<sup>4,8</sup>

Traditional assessments of accessibility in urban planning seldom consider that accessibility is dynamic. Origin-destination studies and surveys lack a dynamic assessment of how traffic congestion or changes in infrastructure or populations affect accessibility.<sup>9,10</sup> These traditional assessments are usually done every five to ten years and are expensive. The conditions they assess may have changed by the time results become public, which can render any proposed solutions irrelevant.<sup>11,12</sup> This study integrated new data and exposes the important links between equity and accessibility to tertiary care emergency services.

1  
2  
3 These innovative approaches for integrating data and accessible web-based platforms offer an  
4 important opportunity for evidence-based decisions and planning to improve health coverage.  
5 These approaches capitalize on, for example, big data from smartphones, which can feed  
6 accurate travel time estimates. We could therefore use dynamic, affordable, and updatable  
7 assessments that account for traffic congestion, thus focusing on travel time to hospitals  
8 instead of distance from them.<sup>5,10,12–16</sup> We also integrated equity-relevant data that we used to  
9 perform equity analyses.  
10  
11

## 12 13 Objectives

14 This study aims to characterize accessibility to tertiary care emergency health services in urban  
15 Cali and the relationship of accessibility to sociodemographic factors relevant to health equity.  
16  
17

## 18 19 Methods:

### 20 21 Study Population and setting

22 This study assesses an aspect of emergency care: emergencies requiring attention in tertiary  
23 care institutions. By early July 2020, COVID-19 pandemic-related quarantine and stay-at-home  
24 orders had been lifted and traffic projections showed substantial congestion. By November  
25 2020, these measures had been reinstated, car travel was restricted by license number, and  
26 traffic projections showed a reduction in travel times.<sup>17–19</sup>  
27  
28

29  
30 This cross-sectional study was carried out using data downloads obtained in the urban area of  
31 the city of Cali, in Southwest Colombia. Cali is the third-largest city in Colombia and the largest  
32 urban center in the country's southwest and Pacific regions, with 2.258 million residents in  
33 2019. About half of the population lives in low-income households, 42% in middle-income  
34 households, and 8% in high-income households. Housing stratification does not necessarily  
35 represent the income of residents. For example, domestic workers living in mansions and  
36 receiving the minimum wage would still be counted as living in a high-income stratum.<sup>20,21</sup>  
37  
38

39  
40 About 84% of the population identifies as white, 14% as Afro-Colombian, and a small  
41 proportion as indigenous or nomadic people like the Rrom. In December 2020, unemployment  
42 rates in Cali were 26.7% for women and 18.5% for men, a one-year increase of 12.5% and 8.8%,  
43 respectively. The situation is worse among young people and an estimated 52% of women and  
44 47.2% of men rely on working in the informal economy. The COVID-19 pandemic punished the  
45 local economy. While 1 in 5 people are unemployed, the rates are higher among people in low-  
46 income households. From 2016 to 2020, Cali also absorbed 139,000 migrants from Venezuela,  
47 25,000 in 2020 alone.<sup>22</sup>  
48  
49

50  
51 Poverty, inequity, and discrimination drove social unrest that led to violence after a 2021  
52 national strike.<sup>23,24</sup>  
53

54  
55 The city government is dividing its 22 communes into a six to eight districts, which might lead to  
56 negotiations over resources and issues such as access to essential services.<sup>25,26</sup>  
57  
58  
59

Looking to the future, identifying and proposing public policy plans and partnerships could improve health equity and bring hope to residents. These measures could also reduce social injustices, including the burden of the inverse care law that vulnerable populations pay more to access essential health services.<sup>4,27,28</sup>

## Targeted Sites/Participants

We targeted the 14 tertiary care institutions with emergency departments registered in the Ministry of Health Special Registry of Health Services Providers (REPS, in Spanish). We searched the registry twice, in July 2020 and January 2021. We verified that all tertiary care institutions provide surgery and intensive care services and listed those institutions on Supplemental File 1.<sup>29</sup>

*Supplemental File 1 Tertiary care emergency departments in institutions with intensive care and surgery, ordered as displayed in REPS<sup>29</sup>*

## Study design

This is a cross-sectional study that used digital technologies and analytics to integrate publicly available data sources. The study generated new knowledge that shows the potential value of examining an evidence-based approach to accessibility and health equity. The study used updatable data to assess travel times and evaluate the effects of interventions and changes in the infrastructure, service provision, traffic congestion, and population.

Study methods:

- Used dynamic assessments of travel times to account for traffic variations.
- Used input from diverse stakeholders to create an interactive platform that displays intersectoral data on dashboards so stakeholders can interpret data quickly and accurately.
- Offered disaggregated data to enable straightforward equity analysis of accessibility.
- Enabled situational analysis of accessibility in an urban setting and supported monitoring and evaluation of health equity related to accessibility.

The cross-sectional study data was obtained from an internet-based platform, the AMORE Platform (<https://www.iquartil.net/proyectoAMORE>), hosted by iQuartil SAS, an analytics company, and developed under the leadership of the principal investigator (LGC).

The AMORE Platform integrates data from:

- [2018 National Census Data](#) for Cali, obtained from the public official databases of the Colombian National Department of Statistics – DANE.<sup>20,21</sup>
- The administrative divisions of Cali obtained from Colombia's [IDESC Geoportal](#), [Traffic Analysis Zones \(TAZ\)](#), and [census block sectors](#).<sup>11,30</sup>
- [Google's Distance Matrix API](#). For this baseline assessment of the urban area of Cali, we downloaded the data of predicted travel times on July 3, for the week of 6 – 12 July

2021, and on October 27, 2020, for the week of 23 – 29 November 2020. Travel times varied substantially during the COVID-19 pandemic and it is unclear how this influenced Google Distance Matrix algorithms.<sup>31</sup> Empirical and anecdotal reports suggest they remained accurate.

- The 14 tertiary care institutions with emergency department in Cali, identified using REPS.<sup>29</sup>

Databases were integrated and tested between August 2020 and October 2021 using KNIME® and Python™ software (back end) and the interface (front end) was developed in Microsoft PowerBi™.

### Patient and public involvement

The involvement of diverse stakeholders and sectors have been part of the design, conduct, and reporting of this study, and the dissemination plans. This is reflected in the composition of the authors and the AMORE Project Collaborative Group (

Acknowledgements). These stakeholders represent diverse elements of governance: authorities, service providers, service users, organized civil society including academics, advocates, and experts from diverse fields of knowledge.

### Results

The AMORE Platform dashboards and visualizations provide simple indicators such as colored maps, dials, bars, and data. These indicators show travel time to the nearest tertiary care emergency room and descriptive statistics for each urban sector at a given traffic congestion level.

The AMORE Platform displays a situational analysis of accessibility in simple visualizations with filters that let users disaggregate data by sociodemographic characteristics for an equity analysis.<sup>32</sup> The upper part of the Platform filters scenarios (Figure 1) and has nine traffic congestion clusters that represent the schedules for a regular week. A dial shows the share of the population within travel time thresholds set in a slider.

*Figure 1 AMORE Platform situational analysis*

The middle section displays a population pyramid and maps with the 14 tertiary care emergency departments, travel times, and population density (Figure 1). The choropleth maps can be expanded and rotated for 3D-display that uses the height of sectors to represent population density (Supplemental File 2).

Supplemental File 2 Travel times and population density, tertiary care institutions, peak traffic, November 2020

The choropleth maps consist of 508 TAZs established by MetroCali (Integrated Massive Transit System) in 2015 for the urban area and linked to the geotagged census block information, matching the population with these TAZs.<sup>11</sup> The origin-destination times were estimated from the population-adjusted geographic centroid of each TAZ to the centroid where each institution was located.

In 2019, Colombia's National Department of Statistics recommended adjusting the 2018 population of Cali upward by 18% from the original census data because of underregistration.<sup>21,33</sup> To make the adjustment, a random selection of 18% of the individual records from the unadjusted census were duplicated with all their original information, adding 495,219 people to complete the 2,258,823 records in the adjusted census. In verifying the records, we found a matching distribution of the variables and results with the unadjusted census. The AMORE Platform lets users toggle the census adjustment (Figure 1, "Data type").

The right section displays sociodemographic characteristics. The graph bars activate filters for data on selected demographics (Figure 1).

## Variables

The AMORE Platform displays the absolute and relative figures for the georeferenced data. This is done for the city or for selected TAZs within a travel time schedule Figure 2. The variables integrated in the platform are listed in Table 1.

Figure 2 Situational analysis, filters and visualizations, Nov 2020

The census was done by interviewing an adult in each household. Data was stored linking it to a city block code to anonymize it. The AMORE Platform used the census microdata categorizations and, for a few variables, aggregate groups for simplification (e.g., education was simplified with guidance from an expert in Colombia's education system, Psychologist Myriam Lorena Rosero Hernández, ME).

## Data sources / measurements

Table 1 Census data included in the AMORE Platform dashboards and maps

| Geotagged variables                                     | Platform display                                      |
|---------------------------------------------------------|-------------------------------------------------------|
| Age in completed years grouped by quinquennium (census) | Population density per Sector/TAZ                     |
| Ethnicity, self-described                               | Health service: tertiary care emergency departments   |
| Health status (Sick / Healthy)                          | Absolute and relative figures of modified aggregation |
| Highest education level attained                        | Travel time thresholds (slider + choropleth heatmap)  |
| Literacy                                                | Travel times and population per TAZ                   |
| Marital status                                          | Overall accessibility for filtered population         |
| Population pyramid by gender and age                    |                                                       |
| Report of disability / physical condition               |                                                       |

## Cross-sectional equity analysis of accessibility by automobile to tertiary care emergency services in Cali, Colombia in 2020

|                                |  |
|--------------------------------|--|
| School attendance              |  |
| Household inhabitants          |  |
| Housing inhabitants            |  |
| Housing socio-economic stratum |  |
| Housing type                   |  |

We used the controls listed in Table 2 to conduct univariate and bivariate analyses.

Table 2 AMORE Platform displays resulting from integrating travel times, services, origin sectors, and census data

|                                                                                                                  |
|------------------------------------------------------------------------------------------------------------------|
| <b>Variables that change according to traffic, travel time threshold, and other filters</b>                      |
| Travel time threshold filter for the analysis.                                                                   |
| Drop-down list with institutions that can be toggled for inactivation.                                           |
| Drop-down list to select people registered by the census, the 18% adjustment, or the total adjusted census data. |
| Traffic levels according to clusters identified with a K-means clustering algorithm.                             |
| Absolute and relative figures provided for each variable.                                                        |
| Maps are organized according to TAZs or sectors.                                                                 |
| Intensive care beds data for selected institutions taken from REPS.                                              |
| <b>People with accessibility for a selected time threshold and traffic level.</b>                                |
| <b>Blocks with accessibility for a selected time threshold.</b>                                                  |
| <b>TAZs within the time threshold by level of traffic.</b>                                                       |
| Household inhabitants                                                                                            |
| Housing inhabitants                                                                                              |
| Housing by power bill economic stratum                                                                           |

## Bias

Each source is susceptible to biases and imprecisions, but these are unlikely to change our conclusions substantially. Some of the data sources and the timing of their updates can introduce a source of bias. For example, the census is updated every five years, and there has been a significant flow of migrants to Cali since the last census, in 2018, and job losses rose during the COVID-19 pandemic.<sup>22,34</sup> These developments likely resulted in some internal displacement and may make our results more positive than reality.

Traffic patterns may have changed with the imposition and lifting of pandemic-related restrictions, thus altering traffic predictions. Stay-at-home orders and traffic restrictions may have reduced traffic congestion, causing an overestimate of accessibility. Google Distance Matrix API may have more accurate travel times for areas where more people travel with mobile phones.

Populations are not evenly distributed across TAZs. We therefore adjusted TAZ geographic centroids by weighing the population distribution. Because centroids had irregular forms, population weighed centroids could end outside the boundaries of a TAZ. This required relocating the adjusted centroid to the nearest border, generating some imprecision that could likely result in some seconds or minutes of imprecision in travel time estimates.

It is possible that the relevance of our findings could change if a new tertiary care facility is registered in REPS (i.e., a new institution opens, or an existing institution is reclassified as



1  
2  
3 tertiary, changing the results). However, the interactive platform would allow for prompt  
4 updates and reanalysis in response to these contingencies.  
5

6  
7 Income categorization is determined by the individual household electricity bill, which is graded  
8 from 1 to 6, with 6 representing the highest-income households. It is possible that some  
9 households were misclassified (e.g., due to error or corruption) and that low-income people are  
10 living in higher-income households. Low-income people may live with relatives or work as  
11 maids or support staff. This kind of misclassification could introduce some bias by representing  
12 low-income populations as having higher income.  
13

14  
15 We developed nine traffic clusters for the city. Traffic patterns are not homogeneous within a  
16 city or sector; traffic flow patterns vary in time and direction. The nine traffic congestion levels  
17 for Cali were sorted in incremental order for each TAZ so that level 9 would always represent  
18 the heaviest traffic and level 1 the lightest. Figure 3 the clusters and typical times at which  
19 traffic is higher in the city, but it is not in every single sector of the city, as these have their own  
20 variations. For example, traffic congestion has directional patterns and affects almost every  
21 sector being higher at noon on Saturdays and early evenings of weekdays, but not all.  
22  
23

24  
25 *Figure 3 Travel-time clusters from free flow to peak traffic, by time and day*  
26

27 The Colombian census recognizes ethnicity, but some people likely found it difficult to choose  
28 their ethnicity. The census lacks an option for residents of white or mestizo descent, two large  
29 groups not specifically listed on the census. Similarly, people with multiethnic parents may find  
30 it difficult to choose one ethnic category.  
31

32  
33 The definition of an acceptable travel time threshold to reach a tertiary care emergency  
34 department is arbitrary. For this analysis, we chose a threshold of 15 minutes at peak traffic  
35 congestion times. Notably, the distribution of traffic levels is skewed towards heavy congestion  
36 from Monday to Saturday between 6:00 and 22:00, with a mode of traffic level 8 (40/168 hours  
37 in the week, 24% of the time). The 168 hours in a week are distributed in the 9 clusters (right  
38 hand side), showing that heavy traffic is the norm in Cali.  
39  
40

## 41 Results / Outcomes

### 42 Participants

43  
44 The study included all the population data from the adjusted, 2,258,823 people from 596,051  
45 households, living in 582,814 housing units. Most of the population is mestizo or white (83.7 %)  
46 or Afro-descendants (326,492; 14.5%). Islanders and Rrom people represent less than 1% of the  
47 population.  
48  
49

### 50 Descriptive data

51  
52 The analysis found that with traffic, most of the low-income population was unable to reach the  
53 nearest tertiary care emergency department within 15 minutes, whether in November 2020 or  
54  
55  
56  
57  
58  
59

July 2020 (Supplemental File 2 and Supplemental File 3, respectively). The analysis also shows how accessibility is an access barrier for people living in low-income households, in areas with high population density, and for those living in the peripheral sectors.

*Supplemental File 3 Travel times by auto to nearest emergency, with peak traffic, July 2020*

## Main results

The effects of traffic disaggregated by household income level, ethnicity, gender and age, education level, and civil status are presented in Figure 4, Figure 5, and Table 3.

*Figure 4 Accessibility by income to tertiary care comparing July and November 2020*

*Figure 5 Accessibility by sociodemographic characteristics in July and November 2020*

## Traffic variations and their effect (July vs November 2020)

### 6 – 12 July vs 23 – 29 November 2020

While the July travel time predictions pointed to 831,982 people (36.8%) living within 15 minutes of travel time from tertiary care emergency services, in November this increased to 1.28 million (56.7%). The distribution of accessibility when disaggregating data by income level indicated lower accessibility for the poor and those living in peripheral sectors (Figure 4, Figure 5, and evident in **Error! Reference source not found.** and Supplemental File 3 to those familiar with the demographic distribution of Cali). These populations also have a higher representation of people from minority ethnic groups and people with lower educational attainment.

Table 3 shows the data obtained from the AMORE Platform for the July 2020 and November 2020 assessments, which lets users explore equity considerations.

## Other analyses

Figure 6 compares accessibility by socio-economic stratum at peak and free flow traffic congestion. It illustrates how people living in low-income households have longer travel times and are more impacted by traffic congestion, forcing them to invest more resources in accessing services.

*Figure 6 Impact of traffic congestion on accessibility, by economic stratum, July 2020*

## Discussion

### Key results

The analysis shows substantial variations in equitable access to tertiary care emergency services due to traffic congestion and the impact that social determinants of health might have on



1  
2  
3 accessibility. The two points of estimate were for early July and late November 2020, and their  
4 substantial variations stress the importance of having updatable sources.  
5  
6

7 The unusually light traffic congestion of November 2020 might have been due to the mobility  
8 restrictions associated with the COVID-19 pandemic. Lighter traffic congestion improved  
9 accessibility for an additional 448,338 people, most of them living in low-income households.  
10 These were the people who were also within the 15-minute threshold (Figure 4) and their  
11 location can be visualized by comparing **Error! Reference source not found.** and Supplemental  
12 File 3. Table 3 shows accessibility at peak traffic hours disaggregated by sociodemographic  
13 characteristics relevant to equity.<sup>35–37</sup>  
14  
15  
16  
17  
18  
19  
20  
21  
22  
23  
24  
25  
26  
27  
28  
29  
30  
31  
32  
33  
34  
35  
36  
37  
38  
39  
40  
41  
42  
43  
44  
45  
46  
47  
48  
49  
50  
51  
52  
53  
54  
55  
56  
57  
58  
59  
60

Table 3 Accessibility by auto within fifteen minutes to tertiary care in July and November, Cali 2020

| 15 min accessibility to the nearest tertiary care emergency service | Jul 2020 (%) | Nov 2020 (%) | Variation    | Jul 2020 (#)   | Nov 2020 (#)     | Variation (#)  | Total Population | %     | Accessibility July | Accessibility November | Subgroup variation |
|---------------------------------------------------------------------|--------------|--------------|--------------|----------------|------------------|----------------|------------------|-------|--------------------|------------------------|--------------------|
|                                                                     | <b>36.8%</b> | <b>56.7%</b> | <b>19.8%</b> | <b>831,982</b> | <b>1,280,320</b> | <b>448,338</b> | <b>2,258,823</b> |       | <b>36.8%</b>       | <b>56.7%</b>           |                    |
| <b>Socio-economic stratum</b>                                       |              |              |              |                |                  |                |                  |       |                    |                        |                    |
| Low                                                                 | 7.7%         | 18.6%        | 10.8%        | 174,869        | 419,448          | 244,579        | 1,109,549        | 49.1% | 15.8%              | 37.8%                  | 22.0%              |
| Middle                                                              | 22.0%        | 30.0%        | 8.0%         | 496,558        | 677,967          | 181,409        | 935,699          | 41.4% | 53.1%              | 72.5%                  | 19.4%              |
| High                                                                | 7.0%         | 7.9%         | 0.9%         | 157,682        | 178,277          | 20,595         | 204,589          | 9.1%  | 77.1%              | 87.1%                  | 10.1%              |
| N.D.                                                                | 0.1%         | 0.2%         | 0.1%         | 2,873          | 4,628            | 1,755          | 8,986            | 0.4%  | 32.0%              | 51.5%                  | 19.5%              |
| <b>Ethnicity</b>                                                    |              |              |              |                |                  |                |                  |       |                    |                        |                    |
| Afrodescendent                                                      | 3.1%         | 5.6%         | 2.5%         | 70,394         | 126,298          | 55,904         | 325,865          | 14.4% | 21.6%              | 38.8%                  | 17.2%              |
| Rrom (nomadic)                                                      | 0.0%         | 0.0%         | 0.0%         | 37             | 53               | 16             | 102              | 0.0%  | 36.3%              | 52.0%                  | 15.7%              |
| Indigenous                                                          | 0.2%         | 0.3%         | 0.2%         | 3,571          | 7,103            | 3,532          | 11,112           | 0.5%  | 32.1%              | 63.9%                  | 31.8%              |
| Islander/Raizal                                                     | 0.0%         | 0.0%         | 0.0%         | 182            | 251              | 69             | 382              | 0.0%  | 47.6%              | 65.7%                  | 18.1%              |
| Other (Caucasian, Mestizo)                                          | 32.9%        | 49.9%        | 17.0%        | 743,469        | 1,126,671        | 383,202        | 1,890,491        | 83.7% | 39.3%              | 59.6%                  | 20.3%              |
| Palenque                                                            | 0.0%         | 0.0%         | 0.0%         | 29             | 176              | 147            | 245              | 0.0%  | 11.8%              | 71.8%                  | 60.0%              |
| N.D.                                                                | 0.6%         | 0.9%         | 0.2%         | 14,300         | 19,768           | 5,468          | 30,626           | 1.4%  | 46.7%              | 64.5%                  | 17.9%              |
| <b>Educational level</b>                                            |              |              |              |                |                  |                |                  |       |                    |                        |                    |
| Graduate degree                                                     | 2.1%         | 2.7%         | 0.5%         | 47,785         | 60,019           | 12,234         | 72,441           | 3.2%  | 66.0%              | 82.9%                  | 16.9%              |
| Bachelor Degree                                                     | 7.4%         | 9.9%         | 2.5%         | 166,816        | 223,602          | 56,786         | 295,319          | 13.1% | 56.5%              | 75.7%                  | 19.2%              |
| Technical                                                           | 4.3%         | 6.5%         | 2.2%         | 97,733         | 147,634          | 49,901         | 244,160          | 10.8% | 40.0%              | 60.5%                  | 20.4%              |
| Middle                                                              | 8.7%         | 14.0%        | 5.3%         | 196,674        | 316,810          | 120,136        | 608,429          | 26.9% | 32.3%              | 52.1%                  | 19.7%              |
| High School                                                         | 4.7%         | 7.6%         | 2.9%         | 105,509        | 171,843          | 66,334         | 337,065          | 14.9% | 31.3%              | 51.0%                  | 19.7%              |
| Primary                                                             | 6.3%         | 10.5%        | 4.3%         | 141,309        | 237,344          | 96,035         | 468,206          | 20.7% | 30.2%              | 50.7%                  | 20.5%              |
| Pre-school                                                          | 0.5%         | 0.8%         | 0.3%         | 11,158         | 18,636           | 7,478          | 36,294           | 1.6%  | 30.7%              | 51.3%                  | 20.6%              |
| No data                                                             | 2.9%         | 4.6%         | 1.7%         | 64,998         | 104,432          | 39,434         | 196,909          | 8.7%  | 33.0%              | 53.0%                  | 20.0%              |
| <b>Literacy</b>                                                     |              |              |              |                |                  |                |                  |       |                    |                        |                    |
| Literate                                                            | 33.8%        | 51.7%        | 17.9%        | 764,426        | 1,168,883        | 404,457        | 2,043,041        | 90.4% | 37.4%              | 57.2%                  | 19.8%              |
| No literacy                                                         | 0.8%         | 1.4%         | 0.6%         | 17,927         | 32,006           | 14,079         | 66,383           | 2.9%  | 27.0%              | 48.2%                  | 21.2%              |
| N.A.                                                                | 1.6%         | 2.7%         | 1.1%         | 36,401         | 61,180           | 24,779         | 121,140          | 5.4%  | 30.0%              | 50.5%                  | 20.5%              |
| N.D.                                                                | 0.6%         | 0.8%         | 0.2%         | 13,228         | 18,251           | 5,023          | 28,259           | 1.3%  | 46.8%              | 64.6%                  | 17.8%              |
| <b>Gender/Sex</b>                                                   |              |              |              |                |                  |                |                  |       |                    |                        |                    |
| Fem                                                                 | 19.9%        | 30.5%        | 10.6%        | 449,188        | 688,160          | 238,972        | 1,208,617        | 53.5% | 37.2%              | 56.9%                  | 19.8%              |
| Masc                                                                | 16.9%        | 26.2%        | 9.3%         | 382,794        | 592,160          | 209,366        | 1,050,206        | 46.5% | 36.4%              | 56.4%                  | 19.9%              |
| <b>Civil status</b>                                                 |              |              |              |                |                  |                |                  |       |                    |                        |                    |
| Single                                                              | 13.4%        | 20.7%        | 7.3%         | 303,645        | 468,447          | 164,802        | 821,536          | 36.4% | 37.0%              | 57.0%                  | 20.1%              |
| Married or cohabitation                                             | 14.6%        | 22.6%        | 7.9%         | 330,460        | 509,814          | 179,354        | 896,958          | 39.7% | 36.8%              | 56.8%                  | 20.0%              |
| Divorced or separated                                               | 2.9%         | 4.2%         | 1.3%         | 65,978         | 95,928           | 29,950         | 163,980          | 7.3%  | 40.2%              | 58.5%                  | 18.3%              |
| Widow                                                               | 1.9%         | 2.6%         | 0.8%         | 42,743         | 59,804           | 17,061         | 95,611           | 4.2%  | 44.7%              | 62.5%                  | 17.8%              |
| N.A.                                                                | 3.4%         | 5.7%         | 2.3%         | 76,821         | 129,370          | 52,549         | 254,492          | 11.3% | 30.2%              | 50.8%                  | 20.6%              |
| N.D.                                                                | 0.5%         | 0.8%         | 0.2%         | 12,335         | 16,957           | 4,622          | 26,246           | 1.2%  | 47.0%              | 64.6%                  | 17.6%              |
| <b>Age</b>                                                          |              |              |              |                |                  |                |                  |       |                    |                        |                    |
| 0-4                                                                 | 1.6%         | 50.5%        | 48.9%        | 36,401         | 61,180           | 24,779         | 121,140          | 5.4%  | 30.0%              | 50.5%                  | 20.5%              |
| 0-14                                                                | 5.4%         | 50.9%        | 45.6%        | 121,111        | 204,055          | 82,944         | 400,527          | 17.7% | 30.2%              | 50.9%                  | 20.7%              |
| 5-14                                                                | 3.8%         | 51.1%        | 47.4%        | 84,710         | 142,875          | 58,165         | 279,387          | 12.4% | 30.3%              | 51.1%                  | 20.8%              |
| 15-24                                                               | 5.3%         | 53.9%        | 48.6%        | 120,001        | 195,693          | 75,692         | 363,311          | 16.1% | 33.0%              | 53.9%                  | 20.8%              |
| 15-59                                                               | 23.8%        | 56.4%        | 32.7%        | 536,754        | 836,078          | 299,324        | 1,482,069        | 65.6% | 36.2%              | 56.4%                  | 20.2%              |
| 15-64                                                               | 25.9%        | 56.7%        | 30.8%        | 585,558        | 904,942          | 319,384        | 1,595,016        | 70.6% | 36.7%              | 56.7%                  | 20.0%              |
| 60+                                                                 | 7.7%         | 63.8%        | 56.1%        | 174,117        | 240,187          | 66,070         | 376,227          | 16.7% | 46.3%              | 63.8%                  | 17.6%              |
| 65+                                                                 | 5.5%         | 65.1%        | 59.5%        | 125,313        | 171,323          | 46,010         | 263,280          | 11.7% | 47.6%              | 65.1%                  | 17.5%              |
| 80+                                                                 | 1.5%         | 69.0%        | 67.6%        | 33,380         | 44,248           | 10,868         | 64,100           | 2.8%  | 52.1%              | 69.0%                  | 17.0%              |
|                                                                     | <b>36.8%</b> | <b>56.7%</b> | <b>19.8%</b> | <b>831,982</b> | <b>1,280,320</b> | <b>448,338</b> | <b>2,258,823</b> |       |                    |                        |                    |

1  
2  
3 Easing of traffic congestion brought an additional 22% (244,579) people in low-income  
4 household within the 15-minute threshold and 19.4% (181,409) more people living in middle-  
5 income households.  
6

7  
8 Minority ethnic groups like the Palenque Afro-descendants and indigenous people that  
9 represent 0.5% of the population of Cali, benefitted the most from the traffic congestion  
10 reduction. The noticeable improvement among the Palenque resulted from most of their  
11 communities being in the neighborhoods of El Morichal, El Retiro, El Vallado, and Ciudad  
12 Córdoba that fell within the 15-min threshold as traffic improved in November (Figure 7).  
13  
14

15 *Figure 7 Location of the Palenque people*  
16

17 Improvements were not significantly disparate among the different groups in terms of sex,  
18 educational attainment and literacy, age, and civil status. In terms of education, people with  
19 higher educational attainment (a bachelor's degree or higher) were less impacted by traffic  
20 changes (69,020 people benefitted) and those with lower educational attainment were more  
21 highly impacted (e.g., 282,505 people with primary, middle, or high school education). Although  
22 the variations are not dramatic in relative figures, the absolute numbers are high considering  
23 that an additional 332,406 people with primary, middle, high, or technical school education  
24 were included as congestion eased.  
25  
26

27  
28 Comparing age groups, children and the young and working-age populations gained more  
29 accessibility with the changes in traffic, as the elderly tend to live closer to health services.  
30

31  
32 The distance and congestion within that distance impact more on the poor, on people with  
33 lower educational attainment, and in the age brackets of children, the youth and working-age  
34 population.  
35

36  
37 Variations in congestion resulted in a substantial improvement, nearly half a million more  
38 people being within a 15-minute accessibility threshold, nearly 20% of the population.  
39

40  
41 Despite improved accessibility, accessibility consistently remained lower for people in low-  
42 income households, those without a college education, Afro-descendants and indigenous  
43 communities, the young and working-age people, and residents of peripheral areas.  
44 Supplemental File 2 and Supplemental File 3 illustrate that tertiary care health services are far  
45 from where most of the population lives. Geospatial analysis, big data, and predictive and  
46 prescriptive analytics could be used to inform service planning in ways that maximize  
47 accessibility if new services are to address these limitations.  
48

49  
50 Planners and service providers who want to combat social injustices must examine this new  
51 evidence that distance and congestion combine to exclude the most vulnerable and  
52 socioeconomically disadvantaged from critical health services. Planners and service providers  
53 must then consider bringing services closer to these populations. This new evidence creates an  
54 opportunity to make a difference for the future, correct injustices, and help people feel they  
55  
56  
57  
58  
59

are included and heard in community planning. This evidence makes the case for using travel time in planning and equity in accessibility when monitoring and evaluating the quality of health services.

## Limitations

The AMORE Platform uses data modelling and clustering to estimate travel times between the origin and destination sectors, lowering the cost of big data. Operational costs are thus low and platform updates for monitoring and evaluation are affordable. The tradeoff for affordability is that small imprecisions in estimates are possible. These imprecisions are more likely to correspond to populations living near the 15-minute threshold and those further away from TAZ centroids with heavy traffic congestion.

Predicted travel times from the Google Distance Matrix API are known to be accurate and are fed by bigdata from smartphones. Other databases, such as [Waze Transport SDK API](#) can be used for estimates. Providers do not release prediction algorithms, making it impossible to know the magnitude and variations introduced by unforeseen events, like restrictions associated with the pandemic, and to estimate errors or biases thus introduced on estimates.

Colombian law requires hospitals to treat patients in emergencies. Modeling for this study assumed that people would always go to the nearest hospital in an emergency, but they may not. People may go to a more distant hospital if they know it better, their insurer recommended it, or it has a good reputation. AMORE Platform estimates may thus be more optimistic than reality.

The study assesses travel times from the place of residence to the nearest hospital. Although the maps allow to look at the travel times from a specific sector, the figures do not reflect the fact that the origin of a trip will not always be the place of residence, and that this limitation will spread differently at different moments and for different populations.

## Interpretation

The AMORE Platform reveals accessibility and its health equity implications, providing new dynamic data that accounts for the effects of traffic. It does so with more precision and at a fraction of the costs of household surveys and origin-destination studies, providing a new tool to inform service plans, programs, and policies.

The use of a platform that integrates publicly available data from public sources might be a breakthrough that improves evidence-informed decisions regarding the location and provision of health services. Visualizations might help stakeholders to interpret the data and agree on a common objective and metric: painting the city green by covering its entire population and offering equitable accessibility to all people.

Updating the AMORE Platform is cheaper and faster than updating other origin-destination studies, its assessments are sensitive to variations, and it can be used to monitor evaluate

changes. In emergencies such as earthquakes, the platform might help having a better situation analysis by feeding real-time data downloads rather than predictions.

These findings suggest that with congested traffic in peak hours, most (63%) Cali residents are beyond the 15-minute travel time threshold by car to the nearest tertiary care emergency department. However, this figure fell to 43% when traffic congestion eased.

Reduced accessibility is unevenly distributed and reflects the inverse care law: people who live in low-income households or have less education face longer travel times to tertiary care emergency departments. Incidentally, heavy traffic also affects people on the periphery of Cali, including some high-income households, as congestion clogs roads they use to reach tertiary emergency care facilities.

Accessibility is one of many potential access barriers to health services, and a critical one. Other factors that affect access to health care (e.g., rights, quality, or supplies) are meaningless if patients cannot reach tertiary emergency care in a crisis. Other access barriers to health services (such as non-compliance with Colombian law, quality, and institutional and reputation) are beyond the scope of this study but also merit consideration.

Researchers and planners can use data mining to optimize locations for new tertiary care emergency services and maximize coverage of populations. Data mining can inform construction of new institutions or improvements to existing ones. Optimizing accessibility could inform sound choices. This data is new and provides an opportunity to improve health services planning. Stakeholders and health equity advocates should consider encouraging the integration of accessibility considerations in urban planning processes.

## Generalizability

This study is reproducible in other settings with dynamic travel time data (e.g., from Waze or Google Maps) and georeferenced service and population data that make situational analyses accessible. The accuracy of information depends on the accuracy of its sources (i.e., census data, service providers, travel time estimates or assessments) and the modeling used to make searches and maintenance affordable and data easy to interpret.

## Other information

### Funding

This study has not yet received external funding; costs have been covered by the principal investigator plus supplementary in-kind contributions by IQuartil SAS, and by Team33 as part of their training with the DS4A data science program. Costs associated to downloading of bigdata and labor costs of producing an advanced prototype of the AMORE Platform were covered by the principal investigator.

## Ethical considerations

This observational study on quality improvement for health services planning does not involve human subjects. It integrates anonymized coded secondary data sources obtained from publicly available open records.<sup>38,39</sup> This study has not been subject to ethical review. No identifiable private information was used in the study. Oversight of the project has been provided by the Doctoral Programme on Methodology of Biomedical Research and Public Health at the Department of Paediatrics, Obstetrics & Gynaecology and Preventative Medicine at the Universitat Autònoma de Barcelona.

## Contributions and acknowledgements

### Authors and contributors

The project and manuscript writing were led by the corresponding author and principal investigator, Luis Gabriel Cuervo. Substantive additional contributions and editing of the report were provided by (in alphabetical order): María Olga Bula, Daniel Cuervo, Janet Hatcher-Roberts, Ciro Jaramillo Molina, Eliana Martínez Herrera, Luis Fernando Pinilla, Felipe Piquero, and Lyda Osorio. All members of the AMORE Project Collaboration listed in Table 4 provided comments, conceptual contributions, or consumer perspectives. All those listed approved the manuscript and declared they stood by this research report.

### Acknowledgements

We are grateful to Stephen Volante CT, member of the American Translators Association, for his support with editing and to María Fernanda Merino for providing strategic guidance. IQartil SAS has hosted the AMORE Platform and we are especially grateful to Pablo Zapata and Lizardo Vanegas for improvements to the AMORE Platform and the AMORE Project website. The development of the AMORE Platform used for this study was led by Luis Gabriel Cuervo, Daniel Cuervo, Luis Fernando Pinilla, and Pablo Zapata. An early prototype of the AMORE Platform was developed under the guidance of the principal investigator (LGC) by Team 33 of the 2020 cohort of the Data Science for All – Correlation Once certificate training program.<sup>40,41</sup> Members of Team 33 included Daniel Cuervo, Catherine Cabrera, Dario Mogollón, Juan G. Betancourt, Stephanie Rojas, Rafael Roper, and Santiago Tobar. This work has been carried out within the framework of the doctorate in Methodology of Biomedical Research and Public Health of the Universitat Autònoma de Barcelona.

## Cross-sectional equity analysis of accessibility by automobile to tertiary care emergency services in Cali, Colombia in 2020

Table 4 Contributions by Members of the AMORE Project Collaboration approving the manuscript

| Surname           | Given name      | Draft writing | Revision & comments | Conceptual contributions | User perspectives | Stands by manuscript | Approved final version |
|-------------------|-----------------|---------------|---------------------|--------------------------|-------------------|----------------------|------------------------|
| Agredo Lemos      | Freddy Enrique  |               | ●                   | ●                        | ●                 | ●                    | ●                      |
| Avila Rodriguez   | German          |               |                     |                          | ●                 | ●                    | ●                      |
| Bula              | María Olga      | ●             | ●                   | ●                        | ●                 | ●                    | ●                      |
| Concha-Eastman    | Alberto         |               |                     | ●                        | ●                 | ●                    | ●                      |
| Cuervo            | Daniel          | ●             | ●                   | ●                        |                   | ●                    | ●                      |
| Cuervo            | Luis Gabriel    | ●             | ●                   | ●                        |                   | ●                    | ●                      |
| Franco            | Oscar           |               |                     | ●                        |                   | ●                    | ●                      |
| Garcia            | Crhistian       |               |                     | ●                        | ●                 | ●                    | ●                      |
| Guerrero          | Rodrigo         |               | ●                   | ●                        | ●                 | ●                    | ●                      |
| Hatcher-Roberts   | Janet           | ●             | ●                   | ●                        |                   | ●                    | ●                      |
| Jaramillo         | Ciro            |               | ●                   | ●                        | ●                 | ●                    | ●                      |
| Martínez Arámbula | Fernando Rafael |               |                     | ●                        |                   | ●                    | ●                      |
| Martínez Herrera  | Eliana          | ●             | ●                   | ●                        | ●                 | ●                    | ●                      |
| Merino Juarez     | Maria Fernanda  |               | ●                   | ●                        |                   | ●                    | ●                      |
| Osorio            | Lyda            |               | ●                   | ●                        | ●                 | ●                    | ●                      |
| Ospina            | Maria B         |               |                     | ●                        | ●                 | ●                    | ●                      |
| Paredes           | Gabriel         | ●             |                     | ●                        |                   | ●                    | ●                      |
| Paredes-Zapata    | David           |               | ●                   | ●                        | ●                 | ●                    | ●                      |
| Pinilla           | Luis Fernando   | ●             | ●                   | ●                        | ●                 | ●                    | ●                      |
| Piquero           | Felipe          | ●             | ●                   |                          | ●                 | ●                    | ●                      |
| Rojas             | Oscar           |               | ●                   |                          | ●                 | ●                    | ●                      |
| Rosero Hernández  | Myriam          |               |                     | ●                        |                   | ●                    | ●                      |
| Tobar-Blandón     | Maria Fernanda  |               | ●                   |                          | ●                 | ●                    | ●                      |
| Zapata Murillo    | Pablo           |               |                     | ●                        |                   | ●                    | ●                      |



## Competing interests

All authors have completed the ICMJE uniform disclosure form and declare: no financial support from any organisation for the submitted work; IQuartil SAS provided technical support to develop the AMORE Platform and was paid by the principal investigator (LGC) for consulting services; DC is a partner at IQuartil SAS and a sibling to LGC. LFP did consultancy at IQuartil SAS until March 2021.

LGC contributed to this work in his personal capacity and time. The views expressed in this article do not necessarily represent the decisions or policies of his employer, PAHO/WHO. Reproductions of this article should not include any suggestion that PAHO/WHO endorsed this research or is endorsing any specific organization, services, or products.

COI Declaration by other members of the AMORE Project Collaborative Group signing off the manuscript: FRMA is an engineer on roads and transportation who participated in his personal capacity and time; his contributions do not necessarily reflect the policies or decisions of his employer, the Municipality of Santiago de Cali. MFMJ participated in her personal capacity and time, and her contributions do not necessarily reflect the policies or decisions of her employer. PZM is a consultant at IQuartil SAS.

## Data sharing statement

The data sources used in this study are in the public domain. The links to the sources are provided (see Study design) and the data constitutes a negligible risk to confidentiality because Colombia's census microdata was anonymized by sectors at the source. The file is downloaded from [open access government websites](#), as required by law. Neither Google Maps Distance Matrix API nor REPS include personal information (see Ethical considerations).

## References

- 1 Ma L, Luo N, Wan T, Hu C, Peng M. An Improved Healthcare Accessibility Measure Considering the Temporal Dimension and Population Demand of Different Ages. *Int J Environ Res Public Health* 2018; **15**. DOI:10.3390/ijerph15112421.
- 2 Levesque J-F, Harris MF, Russell G. Patient-centred access to health care: conceptualising access at the interface of health systems and populations. *Int J Equity Health* 2013; **12**: 18.
- 3 Gao X, Kelley DW. Understanding how distance to facility and quality of care affect maternal health service utilization in Kenya and Haiti: A comparative geographic information system study. *Geospatial Health* 2019; **14**. DOI:10.4081/gh.2019.690.
- 4 Frenk J. The concept and measurement of accessibility. In: White K, ed. *Health Services Research: an anthology*. Washington DC: Pan American Health Organization / World Health Organization, 1992: 8–42855.
- 5 Wang F. Measurement, Optimization, and Impact of Health Care Accessibility: A Methodological Review. *Ann Assoc Am Geogr* 2012; **102**: 1104–12.



## Cross-sectional equity analysis of accessibility by automobile to tertiary care emergency services in Cali, Colombia in 2020

- 1
- 2
- 3 6 Páez A, Scott DM, Morency C. Measuring accessibility: positive and normative
- 4 implementations of various accessibility indicators. *J Transp Geogr* 2012; **25**: 141–53.
- 5
- 6
- 7 7 Cuervo LG. AMORE Project - to improve health equity by reducing the travel time to essential
- 8 health services. Ottawa, 2021 [https://youtu.be/\\_cDMAULJMTc](https://youtu.be/_cDMAULJMTc) (accessed Sept 23, 2021).
- 9
- 10 8 McCollum R, Taegtmeier M, Otiso L, *et al.* Healthcare equity analysis: applying the Tanahashi
- 11 model of health service coverage to community health systems following devolution in
- 12 Kenya. *Int J Equity Health* 2019; **18**: 65.
- 13
- 14
- 15 9 Kong X, Liu Y, Wang Y, Tong D, Zhang J. Investigating Public Facility Characteristics from a
- 16 Spatial Interaction Perspective: A Case Study of Beijing Hospitals Using Taxi Data. *ISPRS Int J*
- 17 *Geo-Inf* 2017; **6**: 38.
- 18
- 19
- 20 10 Neutens T. Accessibility, equity and health care: review and research directions for transport
- 21 geographers. *J Transp Geogr* 2015; **43**: 14–27.
- 22
- 23 11 Unión Temporal UT SDG-CNC. Encuesta de movilidad de hogares Cali 2015: Producto 3.
- 24 Ámbito y zonificación. 2015; published online May. [https://www.metrocali.gov.co/wp/wp-](https://www.metrocali.gov.co/wp/wp-content/uploads/2019/02/Encuesta-de-movilidad-2015.pdf)
- 25 [content/uploads/2019/02/Encuesta-de-movilidad-2015.pdf](https://www.metrocali.gov.co/wp/wp-content/uploads/2019/02/Encuesta-de-movilidad-2015.pdf) (accessed May 30, 2020).
- 26
- 27
- 28 12 Moya-Gómez B, Salas-Olmedo MH, García-Palomares J, Gutiérrez J. Dynamic Accessibility
- 29 using Big Data: The Role of the Changing Conditions of Network Congestion and Destination
- 30 Attractiveness. *Netw Spat Econ* 2018; **18**. DOI:10.1007/s11067-017-9348-z.
- 31
- 32
- 33 13 Crítica Urbana. Comprender para transformar, entrevista a Oriol Nel·lo. 2018
- 34 <https://youtu.be/AHw6F72HqGQ> (accessed Aug 17, 2020).
- 35
- 36 14 Acosta A. Smart Cities & Inequidad: *Forbes Repúb Dominic* 2021; **82**: 12.
- 37
- 38 15 Wang J, Du F, Huang J, Liu Y. Access to hospitals: Potential vs. observed. *Cities* 2020; **100**:
- 39 102671.
- 40
- 41 16 Śleszyński P, Olszewski P, Dybicz T, Goch K, Niedzielski MA. The ideal isochrone: Assessing the
- 42 efficiency of transport systems. *Res Transp Bus Manag* 2022; : 100779.
- 43
- 44
- 45 17 Tiempo CEE. ¡Atención, Cali! Así será la cuarentena hasta el 15 de junio. *El Tiempo*. 2020;
- 46 published online June 1. [https://www.eltiempo.com/colombia/cali/como-sera-la-](https://www.eltiempo.com/colombia/cali/como-sera-la-cuarentena-en-cali-hasta-el-15-de-junio-y-cuales-son-las-medidas-501404)
- 47 [cuarentena-en-cali-hasta-el-15-de-junio-y-cuales-son-las-medidas-501404](https://www.eltiempo.com/colombia/cali/como-sera-la-cuarentena-en-cali-hasta-el-15-de-junio-y-cuales-son-las-medidas-501404) (accessed Nov 7,
- 48 2021).
- 49
- 50 18 Cuarentena en Cali: ¿continúa la Ley Seca y el toque de queda con la extensión? *Colomb.*
- 51 2020; published online Aug 2.
- 52 [https://colombia.as.com/colombia/2020/08/02/actualidad/1596387072\\_578129.html](https://colombia.as.com/colombia/2020/08/02/actualidad/1596387072_578129.html)
- 53 (accessed Nov 7, 2021).
- 54
- 55
- 56
- 57
- 58
- 59
- 60

- 1  
2  
3 19 Colombia mantiene cuarentena hasta el 30 de noviembre. Temas Colomb. 2020; published  
4 online Aug 25. [https://temascolombia.com/colombia-mantiene-cuarentena-hasta-el-30-de-](https://temascolombia.com/colombia-mantiene-cuarentena-hasta-el-30-de-noviembre/)  
5 [noviembre/](https://temascolombia.com/colombia-mantiene-cuarentena-hasta-el-30-de-noviembre/) (accessed Nov 7, 2021).  
6  
7  
8 20 Dirección de Censos y Demografía - DCD,, Departamento Administrativo Nacional de  
9 Estadística - DANE. COLOMBIA - Censo Nacional de Población y Vivienda - CNPV - 2018.  
10 Bogotá: Departamento Administrativo Nacional de Estadística - DANE, 2020.  
11  
12 21 DANE. Información técnica y omisión censal 2018, aspectos conceptuales y metodológicos.  
13 2019. [https://www.dane.gov.co/index.php/estadisticas-por-tema/demografia-y-](https://www.dane.gov.co/index.php/estadisticas-por-tema/demografia-y-poblacion/censo-nacional-de-poblacion-y-vivenda-2018/informacion-tecnica)  
14 [poblacion/censo-nacional-de-poblacion-y-vivenda-2018/informacion-tecnica](https://www.dane.gov.co/index.php/estadisticas-por-tema/demografia-y-poblacion/censo-nacional-de-poblacion-y-vivenda-2018/informacion-tecnica) (accessed Sept  
15 10, 2020).  
16  
17  
18 22 DANE, Sistema Estadístico Nacional - SEN. Información del DANE para la toma de decisiones  
19 regionales: Cali - Valle del Cauca. Colombia - Cali: DANE, 2021.  
20  
21  
22 23 Cali emerges as epicentre of unrest in ongoing Colombia protests | Protests News | Al  
23 Jazeera. [https://www.aljazeera.com/news/2021/5/11/cali-emerges-as-epicentre-of-](https://www.aljazeera.com/news/2021/5/11/cali-emerges-as-epicentre-of-colombias-ongoing-unrest)  
24 [colombias-ongoing-unrest](https://www.aljazeera.com/news/2021/5/11/cali-emerges-as-epicentre-of-colombias-ongoing-unrest) (accessed Oct 11, 2021).  
25  
26  
27 24 Colombia protests: UN calls for investigation into Cali deaths. BBC News. 2021; published  
28 online May 30. <https://www.bbc.com/news/world-latin-america-57300639> (accessed Jan 9,  
29 2022).  
30  
31  
32 25 Cali Distrito se moverá entre siete y ocho localidades.  
33 [http://www.cali.gov.co/publicaciones/146733/cali-distrito-se-movera-entre-siete-y-ocho-](http://www.cali.gov.co/publicaciones/146733/cali-distrito-se-movera-entre-siete-y-ocho-localidades/)  
34 [localidades/](http://www.cali.gov.co/publicaciones/146733/cali-distrito-se-movera-entre-siete-y-ocho-localidades/) (accessed April 24, 2021).  
35  
36  
37 26 Cali Distrito Especial tendría seis localidades.  
38 <http://www.cali.gov.co/publicaciones/148406/cali-distrito-especial-tendria-seis-localidades/>  
39 [\(accessed March 31, 2021\).](http://www.cali.gov.co/publicaciones/148406/cali-distrito-especial-tendria-seis-localidades/)  
40  
41  
42 27 Fiscella K, Shin P. The Inverse Care Law: Implications for Healthcare of Vulnerable  
43 Populations. *J Ambulatory Care Manage* 2005; **28**: 304–12.  
44  
45  
46 28 Hart JT. The inverse care law. *The Lancet* 1971; **297**: 405–12.  
47  
48  
49 29 Google Maps. Location of emergency departments of high-complexity hospitals in Cali,  
50 Colombia, 2021. 2021; published online Jan. <https://tinyurl.com/445fczyz> (accessed Sept 25,  
51 2021).  
52  
53  
54 30 Mapas de Comunas. [http://www.cali.gov.co/publicaciones/115924/mapas\\_comunas\\_idesc/](http://www.cali.gov.co/publicaciones/115924/mapas_comunas_idesc/)  
55 [\(accessed May 30, 2020\).](http://www.cali.gov.co/publicaciones/115924/mapas_comunas_idesc/)  
56  
57  
58 31 Distance Matrix API – APIs & Services – Google Cloud Platform.  
59 <https://console.cloud.google.com/apis/library/distance-matrix->  
60

1  
2  
3 backend.googleapis.com?filter=solution-  
4 type:service&filter=visibility:public&filter=category:maps&id=82aa0d98-49bb-4855-9da9-  
5 efde390a3834&folder=true&organizationId=true&supportedpurview=project (accessed July  
6 22, 2020).  
7  
8

9 32 O'Neill J, Tabish H, Welch V, *et al.* Applying an equity lens to interventions: using PROGRESS  
10 ensures consideration of socially stratifying factors to illuminate inequities in health. *J Clin*  
11 *Epidemiol* 2014; **67**: 56–64.  
12

13 33 Censo Nacional de Población y Vivienda 2018.  
14 [https://www.dane.gov.co/index.php/estadisticas-por-tema/demografia-y-poblacion/censo-](https://www.dane.gov.co/index.php/estadisticas-por-tema/demografia-y-poblacion/censo-nacional-de-poblacion-y-vivenda-2018)  
15 [nacional-de-poblacion-y-vivenda-2018](https://www.dane.gov.co/index.php/estadisticas-por-tema/demografia-y-poblacion/censo-nacional-de-poblacion-y-vivenda-2018) (accessed July 23, 2020).  
16  
17

18 34 DANE, Sistema Estadístico Nacional - SEN. Información del DANE para la toma de decisiones  
19 de las ciudades capitales: Cali - Valle del Cauca. Colombia - Cali: DANE, 2020.  
20

21 35 Kavanagh J, Oliver S, Lorenc T. Reflections on developing and using PROGRESS-Plus. *Equity*  
22 *Update* 2008; **2**: 1–3.  
23  
24

25 36 PROGRESS-Plus | Cochrane Equity. [https://methods.cochrane.org/equity/projects/evidence-](https://methods.cochrane.org/equity/projects/evidence-equity/progress-plus)  
26 [equity/progress-plus](https://methods.cochrane.org/equity/projects/evidence-equity/progress-plus) (accessed March 23, 2020).  
27  
28

29 37 STROBE-Equity. <https://methods.cochrane.org/equity/projects/strobe-equity> (accessed Jan  
30 12, 2022).  
31

32 38 Ministerio de Salud. Resolución 8430 de 1993: Normas científicas, técnicas y administrativas  
33 para la investigación en salud. 1993; published online Oct 4.  
34 [https://www.minsalud.gov.co/sites/rid/Lists/BibliotecaDigital/RIDE/DE/DIJ/RESOLUCION-](https://www.minsalud.gov.co/sites/rid/Lists/BibliotecaDigital/RIDE/DE/DIJ/RESOLUCION-8430-DE-1993.pdf)  
35 [8430-DE-1993.pdf](https://www.minsalud.gov.co/sites/rid/Lists/BibliotecaDigital/RIDE/DE/DIJ/RESOLUCION-8430-DE-1993.pdf).  
36  
37

38 39 World Health Organization, Council for International Organizations of Medical Sciences.  
39 International ethical guidelines for health-related research involving humans. Geneva:  
40 CIOMS, 2017 [https://www.who.int/docs/default-source/ethics/web-cioms-](https://www.who.int/docs/default-source/ethics/web-cioms-ethicalguidelines.pdf?sfvrsn=f62ee074_0)  
41 [ethicalguidelines.pdf?sfvrsn=f62ee074\\_0](https://www.who.int/docs/default-source/ethics/web-cioms-ethicalguidelines.pdf?sfvrsn=f62ee074_0).  
42  
43

44 40 Data Science Training | Data Science for All: Colombia | C1 Insights.  
45 [https://www.correlation-one.com/blog/data-science-for-all-colombia-graduates-500-new-](https://www.correlation-one.com/blog/data-science-for-all-colombia-graduates-500-new-data-professionals)  
46 [data-professionals](https://www.correlation-one.com/blog/data-science-for-all-colombia-graduates-500-new-data-professionals) (accessed May 14, 2021).  
47  
48

49 41 Ministerio de Tecnología y Comunicaciones de Colombia. DS4A Colombia 2020 / Grand  
50 Finale. 2020 <https://youtu.be/sdJWz9BqiQ?t=7362> (accessed Aug 16, 2020).  
51

52 --- END ---  
53  
54  
55  
56  
57  
58

**Figure Legends:**

Supplemental File 4 – Tertiary care emergency departments in institutions with intensive care and surgery, ordered as displayed in REPS

Figure 1 – AMORE Platform situational analysis

Supplemental File 2 – Travel times and population density, tertiary care institutions, peak traffic, November 2020

Figure 3 – Travel-time clusters from free flow to peak traffic, by time and day

Supplemental File 3 – Travel times by auto to nearest emergency, with peak traffic, July 2020

Figure 4 – Accessibility by income to tertiary care comparing July and November 2020

Figure 5 – Accessibility by sociodemographic characteristics in July and November 2020

Figure 6 – Impact of traffic congestion on accessibility, by economic stratum, July 2020

Figure 7 – Location of the Palenque people

1  
2  
3  
4  
5  
6  
7  
8  
9  
10  
11  
12  
13  
14  
15  
16  
17  
18  
19  
20  
21  
22  
23  
24  
25  
26  
27  
28  
29  
30  
31  
32  
33  
34  
35  
36  
37  
38  
39  
40  
41  
42  
43  
44  
45  
46  
47  
48  
49  
50  
51  
52  
53  
54  
55  
56  
57  
58  
59  
60

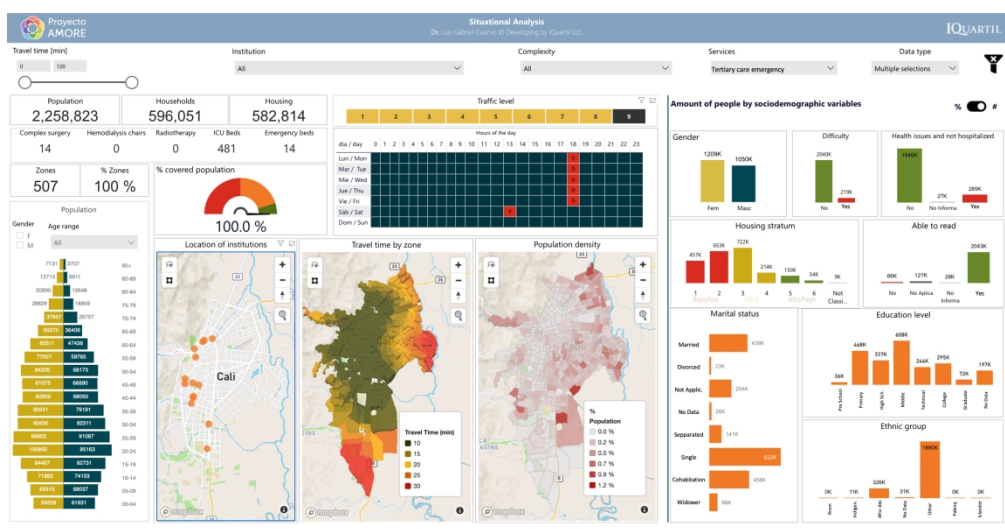

Figure 1, AMORE Platform situational analysis

338x190mm (222 x 222 DPI)

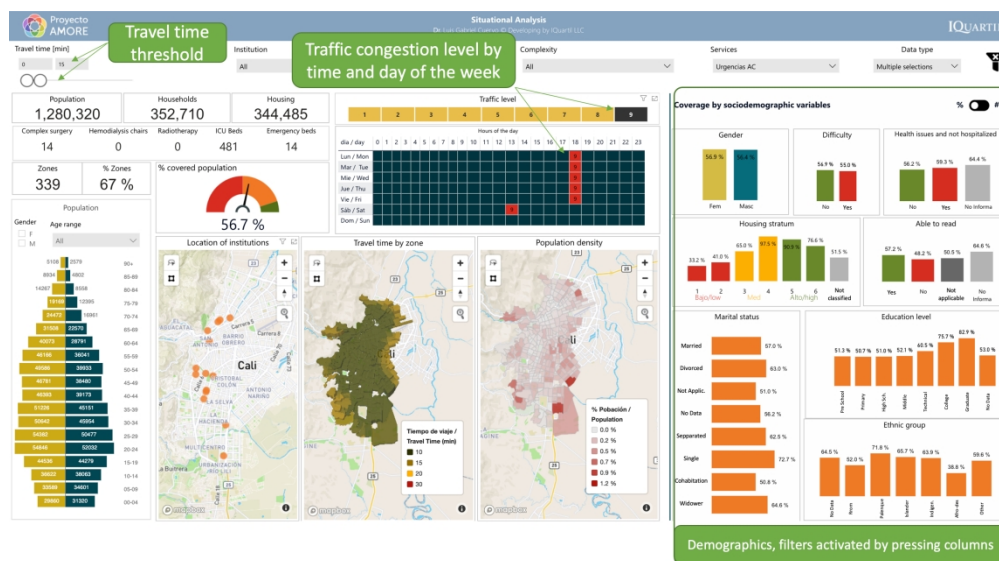

Figure 2, Situational analysis, filters and visualizations, Nov 2020

338x190mm (222 x 222 DPI)

1  
2  
3  
4  
5  
6  
7  
8  
9  
10  
11  
12  
13  
14  
15  
16  
17  
18  
19  
20  
21  
22  
23  
24  
25  
26  
27  
28  
29  
30  
31  
32  
33  
34  
35  
36  
37  
38  
39  
40  
41  
42  
43  
44  
45  
46  
47  
48  
49  
50  
51  
52  
53  
54  
55  
56  
57  
58  
59  
60

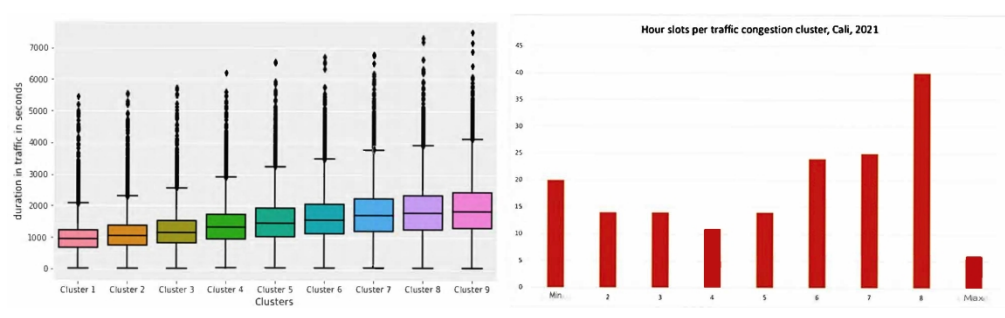

Figure 3, Travel-time clusters from free flow to peak traffic, by time and day  
337x99mm (221 x 222 DPI)

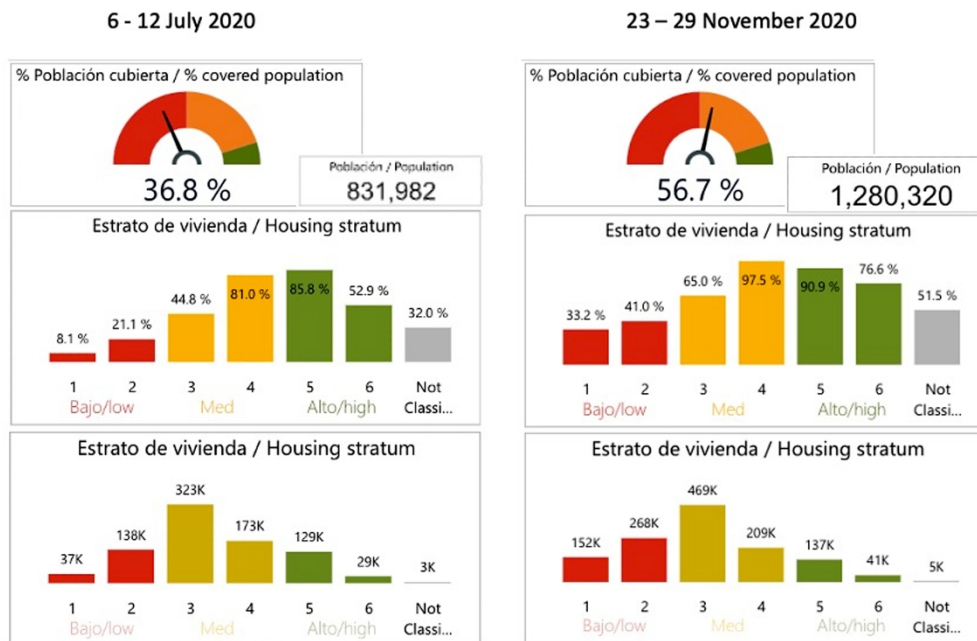

Figure 4, Accessibility by income to tertiary care comparing July and November 2020

284x186mm (222 x 222 DPI)



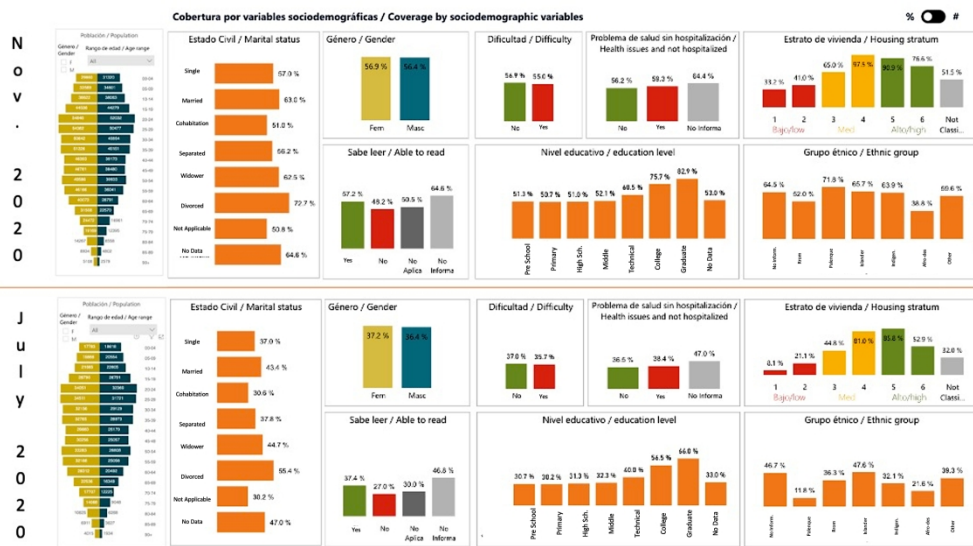

Figure 5, Accessibility by sociodemographic characteristics in July and November 2020

338x190mm (222 x 222 DPI)

Impact of traffic congestion on accessibility to tertiary care emergencies, by economic stratum of the dwelling

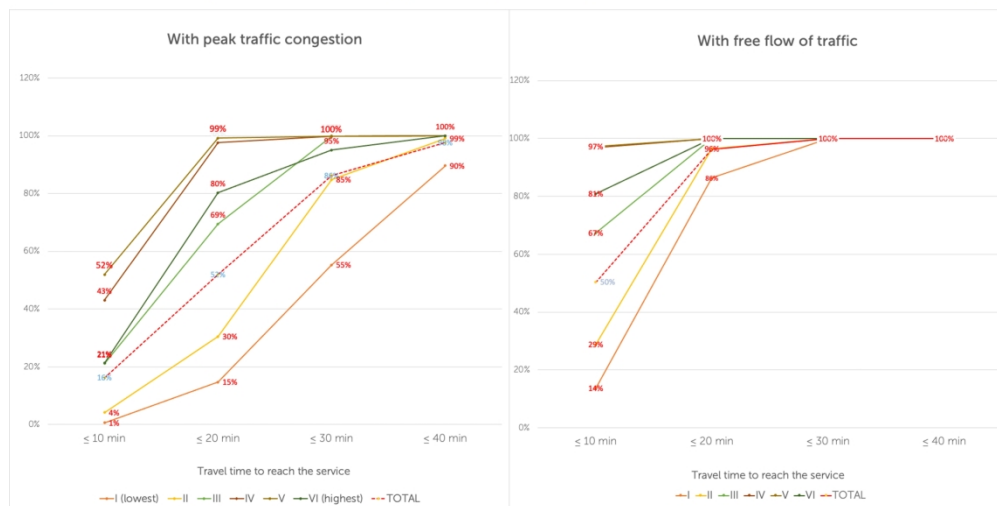

Figure 6 Impact of traffic congestion on accessibility, by economic stratum, July 2020

338x190mm (300 x 300 DPI)

1  
2  
3  
4  
5  
6  
7  
8  
9  
10  
11  
12  
13  
14  
15  
16  
17  
18  
19  
20  
21  
22  
23  
24  
25  
26  
27  
28  
29  
30  
31  
32  
33  
34  
35  
36  
37  
38  
39  
40  
41  
42  
43  
44  
45  
46  
47  
48  
49  
50  
51  
52  
53  
54  
55  
56  
57  
58  
59  
60

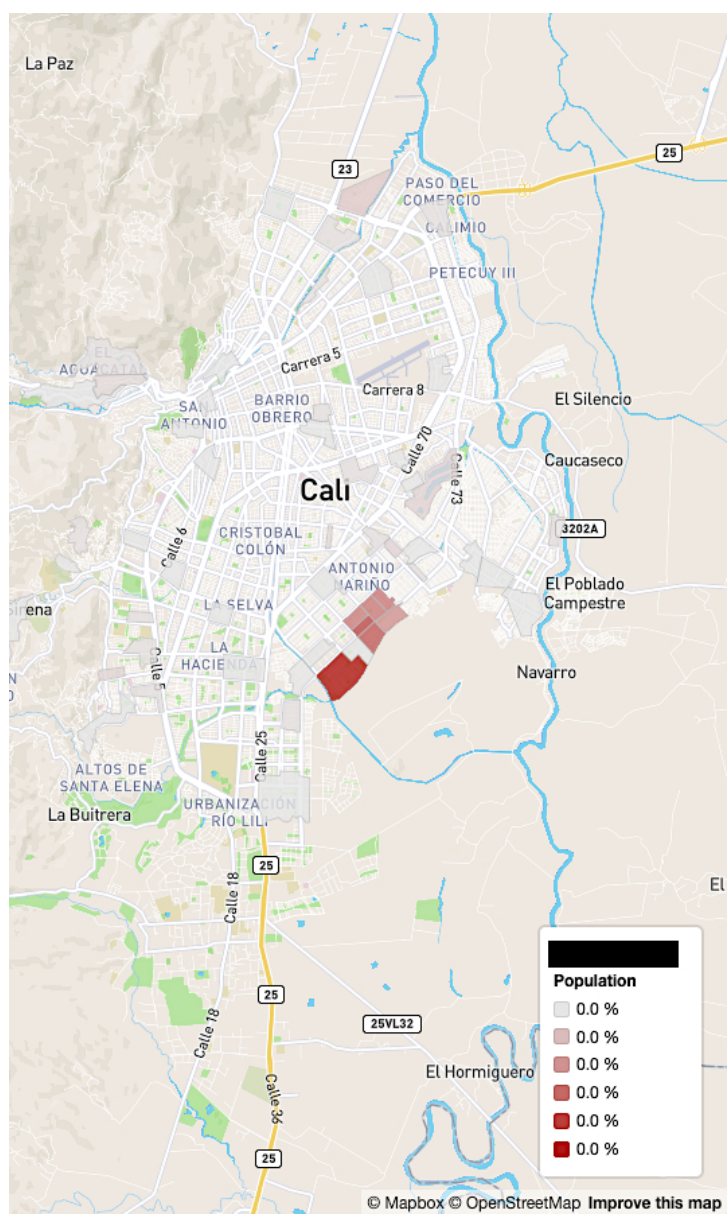

Figure 7, Location of the Palenque people

188x314mm (72 x 72 DPI)

1  
2  
3  
4  
5  
6  
7  
8  
9  
10  
11  
12  
13  
14  
15  
16  
17  
18  
19  
20  
21  
22  
23  
24  
25  
26  
27  
28  
29  
30  
31  
32  
33  
34  
35  
36  
37  
38  
39  
40  
41  
42  
43  
44  
45  
46  
47  
48  
49  
50  
51  
52  
53  
54  
55  
56  
57  
58  
59  
60

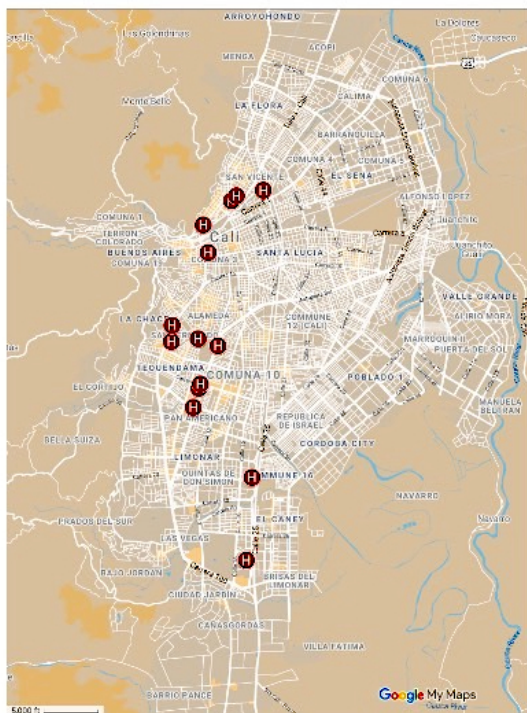

| <b>Institution</b>                                             |
|----------------------------------------------------------------|
| <b>Centro Médico Imbanaco</b>                                  |
| <b>Clínica Amiga</b>                                           |
| <b>Clínica Colombia ES</b>                                     |
| <b>Clínica Colsanitas S.A. Sebastián de Belalcázar</b>         |
| <b>Clínica de Occidente</b>                                    |
| <b>Clínica Esensa</b>                                          |
| <b>Clínica Farallones S.A.</b>                                 |
| <b>Clínica Nuestra</b>                                         |
| <b>Clínica Nuestra Señora de los Remedios</b>                  |
| <b>Clínica Nueva de Cali SAS Sede La Quinta</b>                |
| <b>Clínica Rey David</b>                                       |
| <b>DIME Clínica Neurocardiovascular S.A.</b>                   |
| <b>Hospital Universitario del Valle Evaristo García E.S.E.</b> |
| <b>Fundación Valle de Lili</b>                                 |

228x168mm (81 x 81 DPI)

1  
2  
3  
4  
5  
6  
7  
8  
9  
10  
11  
12  
13  
14  
15  
16  
17  
18  
19  
20  
21  
22  
23  
24  
25  
26  
27  
28  
29  
30  
31  
32  
33  
34  
35  
36  
37  
38  
39  
40  
41  
42  
43  
44  
45  
46  
47  
48  
49  
50  
51  
52  
53  
54  
55  
56  
57  
58  
59  
60

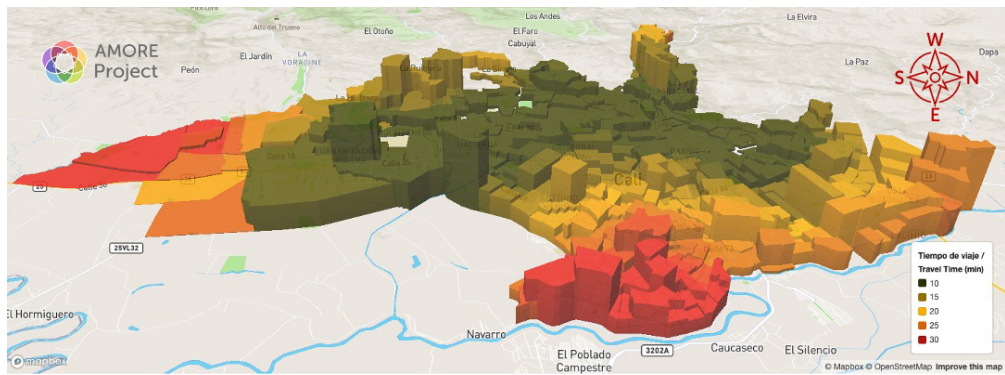

338x123mm (81 x 81 DPI)





## Cross-sectional equity analysis of accessibility by automobile to tertiary care emergency services in Cali, Colombia in 2020

STROBE Statement—Checklist of items that should be included in reports of *cross-sectional studies*

|                              | Item No | Recommendation                                                                                                                                                                                       | Page No |
|------------------------------|---------|------------------------------------------------------------------------------------------------------------------------------------------------------------------------------------------------------|---------|
| <b>Title and abstract</b>    | 1       | (a) Indicate the study's design with a commonly used term in the title or the abstract                                                                                                               | 1       |
|                              |         | (b) Provide in the abstract an informative and balanced summary of what was done and what was found                                                                                                  | 1       |
| <b>Introduction</b>          |         |                                                                                                                                                                                                      |         |
| Background/rationale         | 2       | Explain the scientific background and rationale for the investigation being reported                                                                                                                 | 2       |
| Objectives                   | 3       | State specific objectives, including any prespecified hypotheses                                                                                                                                     | 3       |
| <b>Methods</b>               |         |                                                                                                                                                                                                      |         |
| Study design                 | 4       | Present key elements of study design early in the paper                                                                                                                                              | 4       |
| Setting                      | 5       | Describe the setting, locations, and relevant dates, including periods of recruitment, exposure, follow-up, and data collection                                                                      | 3       |
| Participants                 | 6       | (a) Give the eligibility criteria, and the sources and methods of selection of participants                                                                                                          | 3,4     |
| Variables                    | 7       | Clearly define all outcomes, exposures, predictors, potential confounders, and effect modifiers. Give diagnostic criteria, if applicable                                                             | 8       |
| Data sources/<br>measurement | 8*      | For each variable of interest, give sources of data and details of methods of assessment (measurement). Describe comparability of assessment methods if there is more than one group                 | 4, 6-8  |
| Bias                         | 9       | Describe any efforts to address potential sources of bias                                                                                                                                            | 7       |
| Study size                   | 10      | Explain how the study size was arrived at                                                                                                                                                            | 3, 8    |
| Quantitative variables       | 11      | Explain how quantitative variables were handled in the analyses. If applicable, describe which groupings were chosen and why                                                                         | 6-7, 10 |
| Statistical methods          | 12      | (a) Describe all statistical methods, including those used to control for confounding                                                                                                                | 6, 10   |
|                              |         | (b) Describe any methods used to examine subgroups and interactions                                                                                                                                  | 6, 10   |
|                              |         | (c) Explain how missing data were addressed                                                                                                                                                          | 7, 10   |
|                              |         | (d) If applicable, describe analytical methods taking account of sampling strategy                                                                                                                   |         |
|                              |         | (e) Describe any sensitivity analyses                                                                                                                                                                |         |
| <b>Results</b>               |         |                                                                                                                                                                                                      |         |
| Participants                 | 13*     | (a) Report numbers of individuals at each stage of study—e.g., numbers potentially eligible, examined for eligibility, confirmed eligible, included in the study, completing follow-up, and analyzed | 10      |
|                              |         | (b) Give reasons for non-participation at each stage                                                                                                                                                 | N.A.    |
|                              |         | (c) Consider use of a flow diagram                                                                                                                                                                   |         |
| Descriptive data             | 14*     | (a) Give characteristics of study participants (e.g., demographic, clinical, social) and information on exposures and potential confounders                                                          | 10      |
|                              |         | (b) Indicate number of participants with missing data for each variable of interest                                                                                                                  | 10      |
| Outcome data                 | 15*     | Report numbers of outcome events or summary measures                                                                                                                                                 | 8-10    |

## Cross-sectional equity analysis of accessibility by automobile to tertiary care emergency services in Cali, Colombia in 2020

|                          |    |                                                                                                                                                                                                                |       |
|--------------------------|----|----------------------------------------------------------------------------------------------------------------------------------------------------------------------------------------------------------------|-------|
| Main results             | 16 | (a) Give unadjusted estimates and, if applicable, confounder-adjusted estimates and their precision (e.g., 95% confidence interval). Make clear which confounders were adjusted for and why they were included | 9, 10 |
|                          |    | (b) Report category boundaries when continuous variables were categorized                                                                                                                                      | 8- 10 |
|                          |    | (c) If relevant, consider translating estimates of relative risk into absolute risk for a meaningful time period                                                                                               |       |
| Other analyses           | 17 | Report other analyses done—e.g., analyses of subgroups and interactions, and sensitivity analyses                                                                                                              | 9     |
| <b>Discussion</b>        |    |                                                                                                                                                                                                                |       |
| Key results              | 18 | Summarize key results with reference to study objectives                                                                                                                                                       | 9     |
| Limitations              | 19 | Discuss limitations of the study, taking into account sources of potential bias or imprecision. Discuss both direction and magnitude of any potential bias                                                     | 12    |
| Interpretation           | 20 | Give a cautious overall interpretation of results considering objectives, limitations, multiplicity of analyses, results from similar studies, and other relevant evidence                                     | 12-13 |
| Generalizability         | 21 | Discuss the generalizability (external validity) of the study results                                                                                                                                          | 13    |
| <b>Other information</b> |    |                                                                                                                                                                                                                |       |
| Funding                  | 22 | Give the source of funding and the role of the funders for the present study and, if applicable, for the original study on which the present article is based                                                  | 13    |

\*Give information separately for exposed and unexposed groups.



# BMJ Open

## Dynamic accessibility by car to tertiary care emergency services in Cali, Colombia, in 2020: cross-sectional equity analyses using travel-time big data from a Google API.

|                                 |                                                                                                                                                                                                                                                                                                                                                                                                                                                                                                                                                                                                                                                                                                                                                                                                                                                                                                                                                                                                                                                               |
|---------------------------------|---------------------------------------------------------------------------------------------------------------------------------------------------------------------------------------------------------------------------------------------------------------------------------------------------------------------------------------------------------------------------------------------------------------------------------------------------------------------------------------------------------------------------------------------------------------------------------------------------------------------------------------------------------------------------------------------------------------------------------------------------------------------------------------------------------------------------------------------------------------------------------------------------------------------------------------------------------------------------------------------------------------------------------------------------------------|
| Journal:                        | <i>BMJ Open</i>                                                                                                                                                                                                                                                                                                                                                                                                                                                                                                                                                                                                                                                                                                                                                                                                                                                                                                                                                                                                                                               |
| Manuscript ID                   | bmjopen-2022-062178.R1                                                                                                                                                                                                                                                                                                                                                                                                                                                                                                                                                                                                                                                                                                                                                                                                                                                                                                                                                                                                                                        |
| Article Type:                   | Original research                                                                                                                                                                                                                                                                                                                                                                                                                                                                                                                                                                                                                                                                                                                                                                                                                                                                                                                                                                                                                                             |
| Date Submitted by the Author:   | 08-Jul-2022                                                                                                                                                                                                                                                                                                                                                                                                                                                                                                                                                                                                                                                                                                                                                                                                                                                                                                                                                                                                                                                   |
| Complete List of Authors:       | <p>Cuervo, Luis Gabriel; Universitat Autònoma de Barcelona, Department of Paediatrics, Obstetrics &amp; Gynaecology and Preventative Medicine<br/> Martinez-Herrera, Eliana; Universidad de Antioquia, Facultad Nacional de Salud Pública<br/> Osorio, Lyda; Universidad del Valle Facultad de Salud, Escuela de Salud Pública<br/> Hatcher-Roberts, Janet; University of Ottawa Faculty of Medicine, School of Epidemiology and Public Health; Bruyere Research Institute<br/> Cuervo, Daniel; IQartil SAS<br/> Bula, Maria Olga; Egis Consulting<br/> Pinilla, Luis Fernando; Universidad de La Sabana, Correct email is LuisFerPinilla@gmail.com (system does not allow fixing it)<br/> Piquero, Felipe; Consumer advocate; Author of "Opportunities Amidst Uncertainty: My life with one kidney and without it", Published in English and Spanish<br/> Jaramillo, Ciro; Universidad del Valle, School of Civil and Geomatic Engineering<br/> Collaborative Group, AMORE Project; AMORE Project Collaborative Group; Universitat Autònoma de Barcelona</p> |
| <b>Primary Subject Heading</b>: | Health services research                                                                                                                                                                                                                                                                                                                                                                                                                                                                                                                                                                                                                                                                                                                                                                                                                                                                                                                                                                                                                                      |
| Secondary Subject Heading:      | Public health, Health services research, Health policy, Global health                                                                                                                                                                                                                                                                                                                                                                                                                                                                                                                                                                                                                                                                                                                                                                                                                                                                                                                                                                                         |
| Keywords:                       | Health policy < HEALTH SERVICES ADMINISTRATION & MANAGEMENT, ACCIDENT & EMERGENCY MEDICINE, Quality in health care < HEALTH SERVICES ADMINISTRATION & MANAGEMENT, Organisation of health services < HEALTH SERVICES ADMINISTRATION & MANAGEMENT, PUBLIC HEALTH, HEALTH SERVICES ADMINISTRATION & MANAGEMENT                                                                                                                                                                                                                                                                                                                                                                                                                                                                                                                                                                                                                                                                                                                                                   |
|                                 |                                                                                                                                                                                                                                                                                                                                                                                                                                                                                                                                                                                                                                                                                                                                                                                                                                                                                                                                                                                                                                                               |

SCHOLARONE™  
Manuscripts

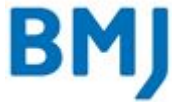

I, the Submitting Author has the right to grant and does grant on behalf of all authors of the Work (as defined in the below author licence), an exclusive licence and/or a non-exclusive licence for contributions from authors who are: i) UK Crown employees; ii) where BMJ has agreed a CC-BY licence shall apply, and/or iii) in accordance with the terms applicable for US Federal Government officers or employees acting as part of their official duties; on a worldwide, perpetual, irrevocable, royalty-free basis to BMJ Publishing Group Ltd ("BMJ") its licensees and where the relevant Journal is co-owned by BMJ to the co-owners of the Journal, to publish the Work in this journal and any other BMJ products and to exploit all rights, as set out in our [licence](#).

The Submitting Author accepts and understands that any supply made under these terms is made by BMJ to the Submitting Author unless you are acting as an employee on behalf of your employer or a postgraduate student of an affiliated institution which is paying any applicable article publishing charge ("APC") for Open Access articles. Where the Submitting Author wishes to make the Work available on an Open Access basis (and intends to pay the relevant APC), the terms of reuse of such Open Access shall be governed by a Creative Commons licence – details of these licences and which [Creative Commons](#) licence will apply to this Work are set out in our licence referred to above.

Other than as permitted in any relevant BMJ Author's Self Archiving Policies, I confirm this Work has not been accepted for publication elsewhere, is not being considered for publication elsewhere and does not duplicate material already published. I confirm all authors consent to publication of this Work and authorise the granting of this licence.

## Title

**Dynamic accessibility by car to tertiary care emergency services in Cali, Colombia, in 2020: cross-sectional equity analyses using travel-time big data from a Google API.**

*Luis Gabriel CUERVO,<sup>(1)</sup> Eliana MARTINEZ HERRERA,<sup>(2)</sup> Lyda OSORIO,<sup>(3)</sup> Janet HATCHER ROBERTS,<sup>(4)</sup> Daniel CUERVO,<sup>(5)</sup> María Olga BULA,<sup>(6)</sup> Luis Fernando PINILLA,<sup>(7)</sup> Felipe PIQUERO,<sup>(8)</sup> Ciro JARAMILLO,<sup>(9)</sup> on behalf of the AMORE Project Collaboration.*

(1) Corresponding author. PhD Candidate, Universitat Autònoma de Barcelona, Spain: [LuisGabriel.Cuervo@autonoma.cat](mailto:LuisGabriel.Cuervo@autonoma.cat)

(2) National School of Public Health, Universidad de Antioquia, Medellín, Colombia

(3) Faculty, School of Public Health, Universidad del Valle, Colombia.

(4) Brüyere Research Institute and Adjunct School of Epidemiology and Public Health, University of Ottawa.

(5) Partner at IQuartil SAS. Industrial Engineer, MBA, Certified Data Analyst.

(6) MSc in urban planning, Egis Consulting.

(7) Universidad de la Sabana. Lecturer in the Operations Management Specialization.

(8) Attorney in administrative law and healthcare legislation. Consumer advocate and book author

(9) Associate Professor in the School of Civil and Geomatic Engineering, Universidad del Valle, Colombia; PhD thesis director, Universitat Autònoma de Barcelona.

## Abstract

**Objectives:** Provide a high-level assessment of dynamic accessibility and health equity to inform policies, plans and programs.

**Design:** The impact of traffic congestion on accessibility to tertiary care emergency departments was studied using a web-based digital platform that integrated publicly available digital data including sociodemographic characteristics of the population and places of residence with travel times, providing an equity perspective.

**Setting and Participants:** Cali, Colombia (population 2.258 million in 2020) using geographic and sociodemographic data. The study used predicted travel times downloaded for a week in July 2020 and a week in November 2020.

**Primary and secondary outcomes:** The share of the population within a 15-minute journey by car from the place of residence to the tertiary care emergency department with the shortest journey (i.e., 15-minute accessibility rate; 15mAR) at peak-traffic congestion hours. Sociodemographic characteristics were disaggregated for equity analyses. A time-series bivariate analysis explored accessibility rates versus housing stratification.

**Results:** Traffic congestion sharply reduces accessibility to tertiary emergency care (e.g., 15mAR was 36.8% during peak-traffic hours vs 84.4% during free-flow hours for the week of July 6 – 12, 2020). Traffic congestion sharply reduces accessibility to tertiary emergency care. The greatest impact fell on specific ethnic groups, people with less educational attainment, and those living in low-income households or on the periphery of Cali (15mAR: 8.1% peak traffic vs 51% free-

Dynamic accessibility by car to tertiary care emergency services in Cali, Colombia, in 2020: cross-sectional equity analyses using travel-time big data from a Google API

flow traffic). These populations face longer average travel times to health services than the average population.

**Conclusions:** This study proposes that health services and land use planning prioritise travel times over travel distance and integrate them into urban planning. Existing technology and data can reveal inequities by integrating sociodemographic data with accurate travel times to health services estimates, providing the basis for valuable indicators.

The study offers a new approach to health services and land use planning

### Strengths and limitations of this study

- The study shows it is possible to estimate dynamic travel times and their correlations with health equity using available and updateable data.
- Travel times change constantly; some changes are predictable and others part of an evolution. These changes can be identified at a scale that offers meaningful inputs for stakeholders, potentially shaping long-term urban and health services planning.
- Data downloads can become affordable and informative enough to guide decisions with data analytics.
- Travel time is not randomly distributed and assessing measurement errors for big data or the census can be impractical; even when the algorithms behind big data are unknown, these data can be superior to static travel-time estimations.
- The study shows it is possible to assess dynamic accessibility and its impact on vulnerable populations affordably.

## Introduction

### Background/Rationale

Every minute counts in life-threatening emergencies that do not leave time for referrals (e.g., insufficient tissue oxygenation, critical bleeding, significant tissue damage, poisoning). The well-being of patients depends on getting immediate attention in a tertiary care facility that offers essential subspecialised care by highly skilled personnel and sophisticated facilities, including specialised surgical theatres and intensive care units.

This study tests a new approach that allows stakeholders to explore different assumptions and scenarios. For example, different time-to-destination thresholds, traffic congestion levels, or accessibility for the whole or parts of the population.

The study delivers baselines for accessibility by car (automobile) to tertiary care emergency departments in Cali, Colombia. It assesses the impact of traffic congestion on accessibility and health equity, using a car (private or for-hire) as the means of transportation because it is how Cali residents typically reach tertiary care facilities in emergencies. This approach also makes it possible for future studies to analyse accessibility with other means of transportation or under different assumptions.

## Dynamic accessibility by car to tertiary care emergency services in Cali, Colombia, in 2020: cross-sectional equity analyses using travel-time big data from a Google API

Accessibility is a dynamic spatial attribute measured as the travel time needed to reach a health service location (destination) from the origin of the demand (place of residence in this study).[1–8] Travel times fluctuate over time and with traffic congestion. Accessibility has been challenging to study and monitor, and poor accessibility can be detrimental to health equity.[4,8–10]

Traditional assessments of accessibility in urban planning seldom consider its dynamic nature; origin-destination studies and surveys usually lack a dynamic assessment showing the effects of infrastructure, population changes, or traffic on accessibility and health equity.[11,12]

Traditional assessments are onerous, done every five to ten years, using lengthy surveys that lack the specificity of health services and the geographical granularity of Traffic Analysis Zones, or TAZs (instead of more expansive neighbourhoods or communes). The conditions assessed may have changed when results become public, rendering any proposed solutions irrelevant.[8,13] This study explores an approach that addresses critical limitations of traditional accessibility assessments to expose the links between equity and accessibility to tertiary care emergency services.[10]

Innovative approaches using accessible web-based platforms are an opportunity for evidence-informed decision-making and planning to improve health coverage. These platforms allow stakeholders to test assumptions and reach conclusions and capitalise on features such as big data from smartphones that can provide accurate travel-time estimates. Therefore, dynamic, affordable, and updatable assessments that account for traffic congestion could be used, thus focusing on travel times instead of travel distances.[5,8,12,14–17] They might allow stakeholders to explore data, test assumptions better, and reach action-oriented conclusions.[18] This study integrates the equity-relevant data we used to perform equity analyses.

### Objectives

This study aims to characterise accessibility to tertiary care emergency health services in urban Cali and the links between accessibility and sociodemographic factors relevant to health equity.

### Methods:

#### Study population and setting

This study is about emergencies requiring attention in tertiary care institutions. By early July 2020, COVID-19 pandemic-related quarantine and stay-at-home orders had been lifted, and traffic projections showed substantial congestion. By November 2020, some measures had been reinstated, car travel was restricted by license number, and traffic projections showed reduced travel times, especially in central city areas.[19–21]

## Dynamic accessibility by car to tertiary care emergency services in Cali, Colombia, in 2020: cross-sectional equity analyses using travel-time big data from a Google API

This cross-sectional study was conducted with data downloads for the urban area of Cali, the third-largest city in Colombia and the largest urban centre in the southwest and Pacific regions, with an estimated 2.258 million residents in 2020. About half of the population lives in low-income housing, 42% in middle-income housing, and 8% in high-income housing. Housing stratification does not necessarily represent the income of individuals.[22,23]

About 84% of the population identifies as white, 14% as Afro-Colombian and a small proportion as indigenous or nomadic people like the Rrom. In December 2020, unemployment rates in Cali were 26.7% for women and 18.5% for men, a one-year increase of 12.5% and 8.8%, respectively.

The situation was worse among young people, and an estimated 52% of women and 47.2% of men relied on the informal economy. The COVID-19 pandemic punished the local economy. While 1 in 5 people was unemployed, the rates were higher among people in low-income households. From 2016 to 2020, Cali also absorbed 139,000 migrants from Venezuela; 25,000 in 2020.[24]

Poverty, inequity, and discrimination drove social unrest that led to violence after a 2021 national strike.[25,26]

The city government is dividing its 22 communes into six to eight districts, which might lead to negotiations over resources and issues such as access to essential services.[27,28]

### Targeted sites/Participants

The study targeted the 14 tertiary care institutions with emergency departments registered in the Ministry of Health Special Registry of Health Services Providers (REPS in Spanish). The registry listed the same institutions in July 2020 and January 2021; all provided surgery and intensive care services. Those institutions are listed in Supplemental File 1.[29]

*Supplemental File 1 Tertiary care emergency departments in institutions with intensive care and surgery, ordered as displayed in REPS[29]*

### Study design

This study includes two cross-sectional analyses integrating publicly available data using digital technologies and analytics. The study generated new knowledge of potential value when implementing evidence-informed approaches to improve accessibility and health equity. The study used updatable data to measure travel times and evaluate the effects of interventions and changes to infrastructure, service provision, traffic congestion, and population. The following study methods seek to address current challenges for assessments of accessibility to health services:[10]

- Dynamic assessments of travel times to account for traffic variations.

## Dynamic accessibility by car to tertiary care emergency services in Cali, Colombia, in 2020: cross-sectional equity analyses using travel-time big data from a Google API

- Inputs from diverse stakeholders to create an interactive platform that displays intersectoral data on dashboards so stakeholders can interpret data quickly and accurately.
- Disaggregated data to enable straightforward equity analysis of accessibility.
- Situational analysis of the accessibility to specific services for urban areas.
- An approach suitable for monitoring health equity related to accessibility.

The data for the cross-sectional analyses were obtained from the internet-based AMORE Platform (<https://www.iquartil.net/proyectoAMORE>), hosted by iQuartil SAS, an analytics company, and developed under the leadership of the Principal Investigator (LGC).

The AMORE Platform integrates data from:

- [2018 National Census Data](#) for Cali, obtained from the official public databases of the Colombian National Department of Statistics (DANE in Spanish).[22,23]
- The administrative divisions of Cali were obtained from the Colombian [IDESC Geportal](#); [Traffic Analysis Zones \(TAZ\)](#) were matched to the [census blocks](#).[13,30] The origin for each journey is the population-weighted centroid for the TAZ of the place of residence. Similarly, the destination is the centroid for the TAZ hosting the tertiary care emergency department with the shortest travel time.
- [Google Distance Matrix API](#). For this baseline assessment of the Cali urban area, predicted travel times were downloaded on 3 July 2020 for the week of 6 – 12 July 2020, and on 27 October 2020, for the week of 23 – 29 November 2020. Travel times varied substantially during the COVID-19 pandemic and while it is unclear how this influenced Google Distance Matrix algorithms,[31] empirical and anecdotal reports suggest they remained accurate.
- The 14 tertiary care institutions with an emergency department in Cali were identified using [REPS](#).[29]

Databases were integrated and tested between August 2020 and October 2021 using: KNIME® open-source data analytics reporting and integration platform, Python™ programming language software (back end), and an interface (front end) developed with interactive data visualisation software Microsoft PowerBi™.

## Patient and public involvement

The AMORE Project Collaborative Group is diverse, with over two-dozen contributors representing different stakeholders and sectors. Group members participated throughout the design, conduct, and reporting of this study and the dissemination of results. The contributors and some public servants participated in the co-creation of knowledge and are listed in the Acknowledgements. These collaborators offer different governance perspectives: authorities, service providers, service users, and organised civil society, including academics, advocates, and experts from various fields of knowledge.[32,33]



## Dynamic accessibility by car to tertiary care emergency services in Cali, Colombia, in 2020: cross-sectional equity analyses using travel-time big data from a Google API

### Data integration and output

The [AMORE Platform](#) dashboards and visualisations provide descriptive indicators using simple maps, dials, bars, and data. These indicators show travel times using the shortest journeys and descriptive statistics for each urban TAZ at a given traffic congestion level. The displays for July and November can be accessed on this [project website](#). The [AMORE Platform](#) allows users to perform equity analyses by disaggregating sociodemographic characteristics.[34] The top section of the Platform (Figure 1) has nine traffic-congestion clusters and their representation in the week. A dial shows the share of the population within the set travel-time threshold.

*Figure 1 AMORE Platform situational analysis*

The middle section displays a population pyramid and maps the 14 tertiary care emergency departments, travel times, and population density (Figure 1). Each section of the pyramid or map can be toggled to filter populations. The choropleth maps can be expanded and rotated for a 3D display, with TAZ height representing population density (Supplemental File 2). Selecting a TAZ displays its ID, population, and travel time.

*Supplemental File 2 Travel times and population density, tertiary care institutions, peak traffic, November 2020*

Choropleth maps consist of TAZs established by MetroCali (Integrated Mass Transit System) in 2015 for the urban area and linked to the geotagged census block information, matching the population with these TAZs.[13] The geometric matching of blocks and TAZs yielded 507 inhabited TAZs within the urban perimeter. The origin-destination times were estimated from the population-adjusted geographic centroid of each TAZ to the respective centroid where each institution was located.

The Colombian census was completed through interviews with an adult for each household. Data was stored, linking it to a city block code to anonymise it. The AMORE Platform used the census microdata categorisations and, for a few variables, aggregate groups for simplification (e.g., education was simplified with guidance from an expert in the Colombian education system, Psychologist Myriam Lorena Rosero Hernández, ME).

In 2019, DANE recommended adjusting the 2018 population of Cali upward by 18% from the original census data due to under-registration.[23,35] DANE advised making further adjustments due to intercensal growth, migration and updates.[24,36] These adjustments amounted to 28.1%, and DANE did not disaggregate the adjustment data. Therefore, 495,219 records were randomly selected and duplicated, reaching a population of 2,258,823 inhabitants, keeping the distributions. These are displayed in the AMORE Platform by toggling the census adjustment (Figure 1, “Data type”).

The right section of the platform displays sociodemographic characteristics (Figure 1).

## Dynamic accessibility by car to tertiary care emergency services in Cali, Colombia, in 2020: cross-sectional equity analyses using travel-time big data from a Google API

The AMORE Platform displays the absolute and relative figures for the georeferenced data of inhabitants, both for the city or selected TAZs within a travel schedule Figure 2. The variables integrated into the platform are listed in Table 1.

Figure 2 Situational analysis, filters and visualisations, Nov 2020

### Data sources/measurements

Table 1 Census data included in the AMORE Platform dashboards and maps

| Geotagged variables                                     | Platform display                                      |
|---------------------------------------------------------|-------------------------------------------------------|
| Age in completed years grouped by quinquennium (census) | Population density per TAZ                            |
| Ethnicity, self-described                               | Health service: tertiary care emergency departments   |
| Health status (Sick / Healthy)                          | Absolute and relative figures of modified aggregation |
| Highest education level attained                        | Travel-time thresholds (slider + choropleth heatmap)  |
| Literacy                                                | Travel times and population per TAZ                   |
| Marital status                                          | Overall accessibility for filtered population         |
| Population pyramid by gender and age                    |                                                       |
| Report of disability / physical condition               |                                                       |
| School attendance                                       |                                                       |
| Household inhabitants                                   |                                                       |
| Housing inhabitants                                     |                                                       |
| Housing socio-economic stratum                          |                                                       |
| Housing type                                            |                                                       |

We used the controls listed in Table 2 to conduct univariate and bivariate analyses.

Table 2 AMORE Platform displays resulting from integrating travel times, services, origin TAZ, and census data

| Variables that change according to traffic, travel-time threshold, and other filters                         |
|--------------------------------------------------------------------------------------------------------------|
| Travel-time threshold filter for the analysis.                                                               |
| Drop-down list with institutions that can be toggled for inactivation.                                       |
| Drop-down list to select people registered by the census, the 28.1% adjustment, or the adjusted census data. |
| Traffic levels identified with a K-means clustering algorithm.                                               |
| Absolute and relative figures provided for each variable.                                                    |
| Maps are organized by TAZs.                                                                                  |
| Intensive care beds data for selected institutions taken from REPS.                                          |
| <b>People with accessibility for a selected time threshold and traffic level.</b>                            |
| <b>Blocks with accessibility for a selected time threshold.</b>                                              |
| <b>TAZs within the time threshold by level of traffic.</b>                                                   |
| Household inhabitants                                                                                        |
| Housing inhabitants                                                                                          |
| Housing by power bill economic stratum                                                                       |

### Bias

Each source is susceptible to biases and imprecision, but these are unlikely to be of a magnitude that would change conclusions. Some of the data sources and the timing of their updates can introduce bias. For example, the census is updated every five years. Since the last

**Dynamic accessibility by car to tertiary care emergency services in Cali, Colombia, in 2020: cross-sectional equity analyses using travel-time big data from a Google API**

census in 2018, there has been a significant flow of migrants to Cali and job losses rose during the COVID-19 pandemic.[24,37] These developments likely make our results appear more favourable than they are. The census had under-registration from failed or incomplete visits, underreporting of people living in households, or people absent in each of the three times registrars visited. The estimates for migrants and intercensal growth are broad and likely unevenly distributed among the population and no precise measurement errors are available.[23,24]

Traffic patterns may have changed with the imposition and lifting of pandemic-related restrictions, thus altering traffic predictions. Stay-at-home orders and traffic restrictions may have changed traffic congestion, causing unusual and uneven patterns of accessibility. Google Distance Matrix API may have more accurate travel times for areas where more people travel with mobile phones and in cars.

Income categorisation is determined by the individual household electricity bill, which is graded from 1 to 6, with 6 representing the highest-income households. Some homes may have been misclassified (e.g., due to error or corruption) and that low-income people are living in higher-income households. This is possible for relatives and domestic workers residing in high-income housing and earning minimum wages or having no income. This kind of misclassification would introduce some bias that would overrepresent high-income populations.

The Colombian census recognises ethnicity, but some people likely found it difficult to choose their ethnicity. The census lacks an option for residents of white or mestizo descent, two large groups not explicitly listed on the census. Similarly, people with multi-ethnic parents may find it challenging to choose one ethnic category.

Traffic restrictions linked to car license numbers affect households and neighbourhoods differently; more affluent families are more likely to own more cars and be less affected by these measures.[38]

To reduce data downloads, we performed a cluster analysis (using a K-means method) of the travel times on a sample of the total weekly hours. This allowed us to identify the hours of the week with similar traffic congestion levels by measuring the incremental changes against the minimum travel time. We determined that nine clusters allowed us to discriminate traffic congestion based on sensitivity analysis to represent the 168 hours of the week.

For each day and hour time band, we estimated the percentage difference between the minimum time of that trip and the travel for the time band. We calculated the average of this metric for all the journeys of the sample to obtain clusters. For example, the traffic from 6 to 7 p.m. on weekdays and from noon to 2 p.m. on Saturdays behaves similarly for this cluster, representing the highest traffic congestion. Creating these clusters again reduces information requirements and costs.

**Dynamic accessibility by car to tertiary care emergency services in Cali, Colombia, in 2020: cross-sectional equity analyses using travel-time big data from a Google API**

Using hourly assessments is arbitrary; travel times could be measured every minute or second. However, more frequent checks would increase costs (i.e., from data downloads, computing time, people time) by orders of magnitude without substantive changes in the conclusions. More frequent checks would thus be impractical and of little value. Details of the effects of these optimisations will be the subject of a future manuscript.

Using congestion clusters and TAZs for the 14 institutions made it possible to obtain the city estimates with a sample of 1,159,536 measurements downloaded from Google Distance Matrix API. The geometric matching of blocks and TAZs yielded 507 inhabited TAZs in the urban perimeter.

Populations are not evenly distributed across TAZs. We therefore adjusted TAZ geographic centroids by weighing population distribution. Because centroids had irregular shapes, population-weighted centroids could end outside the boundaries of a TAZ. This required relocating the adjusted centroid to the nearest border, potentially generating some seconds of imprecision in estimates. Similarly, using the TAZ of a hospital instead of the location of the emergency department entrance also generates imprecisions.

Traffic patterns are not homogeneous within the city or its TAZs; traffic flow patterns vary in time and direction. We therefore sorted traffic times so that cluster nine always represented the maximum traffic congestion, cluster one the minimum traffic congestion, and intermediate clusters were sorted accordingly. Figure 3 illustrates the clusters and variations.

*Figure 3 Travel-time clusters from free-flow to peak traffic, by time and day.*

The definition of an acceptable travel-time threshold to reach a tertiary care emergency department is arbitrary, and we found no international standard. For this analysis, we chose a threshold of fifteen minutes at peak-traffic congestion times that was the most frequently considered by interviewed local public servants and members of the AMORE Project Collaborative; it is within the thresholds found in the literature.[39–41]

Notably, the distribution of traffic levels is skewed towards heavy congestion from Monday to Saturday between 6:00 and 22:00, with the mode being cluster 8 (40/168 hours, or 24% of the week); Cali is a congested city.

## Results/Outcomes

### Participants

The study included the adjusted population of 2,258,823 people, representing 596,051 households living in 582,814 housing units. The size and representation of populations are disaggregated in Table 3.

## Dynamic accessibility by car to tertiary care emergency services in Cali, Colombia, in 2020: cross-sectional equity analyses using travel-time big data from a Google API

Most of the population is mestizo or white (83.7 %) or Afro-descendants (14.5%). Islanders and Rrom people represent less than 1% of the population. Absolute and relative figures disaggregated by sociodemographic characteristics are presented in Table 3.

### Descriptive data

The analysis found that most of the low-income population could not reach the nearest tertiary care emergency department within 15 minutes during peak-traffic times, whether in November 2020 (81.4%) or July 2020 (96.3%; Supplemental File 2 and Supplemental File 3, respectively).

The analysis also shows that accessibility is a substantial barrier to low-income households with high population density and those living in peripheral TAZs, amplifying inequities.

*Supplemental File 3 Travel times by auto to the nearest emergency, with peak traffic, July 2020*

### Main results

The effects of traffic disaggregated by household income level, ethnicity, gender and age, education level, and civil status are presented in Figure 4, Figure 5, and Table 3. Figure 6 shows differential accessibilities by housing stratum during peak and free-flow traffic hours, with the differential being more detrimental to the poorest and more affected by peak-traffic congestion.

*Figure 4 Accessibility by income to tertiary care comparing July and November 2020*

*Figure 5 Accessibility by sociodemographic characteristics in July and November 2020*

### Traffic variations and their effect (July vs November 2020)

#### 6 – 12 July vs 23 – 29 November 2020

The July travel-time predictions pointed to 831,982 people (36.8%) living within 15 minutes of travel time from tertiary care emergency services, but this increased to 1.28 million (56.7%) in November. The distribution of accessibility when disaggregating data by income level indicated lower accessibility for the poor and those living in peripheral TAZs (Figure 4, Figure 5, and evident in Supplemental File 2 and Supplemental File 3 to those familiar with the demographic distribution of Cali). These populations also have a higher representation of minority ethnic groups and people with lower educational attainment.

Table 3 shows the data obtained from the AMORE Platform for the July 2020 and November 2020 assessments, which lets users explore equity considerations.

## Dynamic accessibility by car to tertiary care emergency services in Cali, Colombia, in 2020: cross-sectional equity analyses using travel-time big data from a Google API

### Other analyses

Figure 6 shows that people living in low-income households face longer travel times and are more severely impacted by traffic congestion; they thus invest more resources in accessing services.

Myriads of analyses can be done by modifying traffic congestion clusters, travel-time thresholds, or toggling population groups or institutions. For pragmatic reasons, this article focused on sticking to the 15-minute threshold and exploring accessibility at peak hours in more detail, which is a good scenario when planning for emergencies.

*Figure 6 Impact of traffic congestion on accessibility, by economic stratum, July 2020*

## Discussion

### Main findings

The analysis shows substantial variations in access to tertiary care emergency services due to traffic congestion and the links between geographical accessibility and other social determinants of health. The two points of estimate were for early July and late November 2020, and their substantial variations stress the importance of having updatable sources.

The unusually light traffic congestion of November 2020 might have been due to the mobility restrictions associated with the COVID-19 pandemic. Lighter traffic congestion improved accessibility for an additional 448,338 people, most living in low-income households. These people were also within the 15-minute threshold (Figure 4), and their location can be visualised by comparing Supplemental File 2 and Supplemental File 3. Table 3 shows accessibility at peak-traffic hours disaggregated by sociodemographic characteristics relevant to equity.[42–44]

The longest journeys were 46 minutes in July and November. These journeys started from densely populated, impoverished eastern neighbourhoods along the Cauca River (Aguablanca district) and sparsely populated wealthy villas in the southern edge of the city, bordering Jamundí.

Easing traffic congestion brought an additional 22% (244,579) of people in the low-income household and 19.4% (181,409) more people living in middle-income households within the 15-minute threshold.

Improvements were not notably disparate among the different groups (sex, educational attainment and literacy, age, and civil status). In terms of education, people with higher educational attainment (a bachelor's degree or higher) were less impacted by traffic changes (69,020 people) and those with lower educational attainment were more highly impacted (e.g., 282,505 people with primary, middle, high, or technical school education). The variations seemed unimpressive in relative terms but are notable in absolute numbers, considering that

Dynamic accessibility by car to tertiary care emergency services in Cali, Colombia, in 2020: cross-sectional equity analyses using travel-time big data from a Google API

an additional 332,406 people with primary, middle, high, or technical school education were included as congestion eased. Variations in congestion resulted in substantial accessibility improvement, with nearly half a million more people within a 15-minute accessibility threshold, almost 20% of the population.

Comparing age groups, children and the young and working-age populations gained more accessibility with the changes in traffic, as the elderly tend to live closer to health services.

Palenque, Islanders, Rrom, and indigenous people represent 0.5% of the population of Cali. Minority ethnic groups benefitted the most from the reduction in traffic congestion. The noticeable improvement among the Palenque resulted from most living in the south-eastern neighbourhoods of El Morichal, El Retiro, El Vallado, and Ciudad Córdoba, which fell within the 15-minute threshold when traffic eased in November (see **Error! Reference source not found.**).

*Figure 7 Location of the Palenque people*

Supplemental File 2 and Supplemental File 3 show that tertiary care health services are far from where most of the population lives. Geospatial analysis, big data, and predictive and prescriptive analytics could inform service planning in ways that maximise accessibility if new services address these limitations.



Table 3 Accessibility by auto within fifteen minutes to tertiary care in July and November, Cali 2020

| 15 min accessibility to the nearest tertiary care emergency service | Jul 2020 (%) | Nov 2020 (%) | Change | Jul 2020 (#) | Nov 2020 (#) | Change (#) | Total Population | %     | Accessibility July | Accessibility November | Subgroup change |
|---------------------------------------------------------------------|--------------|--------------|--------|--------------|--------------|------------|------------------|-------|--------------------|------------------------|-----------------|
|                                                                     | 36.8%        | 56.7%        | 19.8%  | 831,982      | 1,280,320    | 448,338    | 2,258,823        |       | 36.8%              | 56.7%                  |                 |
| <b>Socio-economic stratum</b>                                       |              |              |        |              |              |            |                  |       |                    |                        |                 |
| Low                                                                 | 7.7%         | 18.6%        | 10.8%  | 174,869      | 419,448      | 244,579    | 1,109,549        | 49.1% | 15.8%              | 37.8%                  | 22.0%           |
| Middle                                                              | 22.0%        | 30.0%        | 8.0%   | 496,558      | 677,967      | 181,409    | 935,699          | 41.4% | 53.1%              | 72.5%                  | 19.4%           |
| High                                                                | 7.0%         | 7.9%         | 0.9%   | 157,682      | 178,277      | 20,595     | 204,589          | 9.1%  | 77.1%              | 87.1%                  | 10.1%           |
| N.D.                                                                | 0.1%         | 0.2%         | 0.1%   | 2,873        | 4,628        | 1,755      | 8,986            | 0.4%  | 32.0%              | 51.5%                  | 19.5%           |
| <b>Ethnicity</b>                                                    |              |              |        |              |              |            |                  |       |                    |                        |                 |
| Afro descendent                                                     | 3.1%         | 5.6%         | 2.5%   | 70,394       | 126,298      | 55,904     | 325,865          | 14.4% | 21.6%              | 38.8%                  | 17.2%           |
| Rrom (nomadic)                                                      | 0.0%         | 0.0%         | 0.0%   | 37           | 53           | 16         | 102              | 0.0%  | 36.3%              | 52.0%                  | 15.7%           |
| Indigenous                                                          | 0.2%         | 0.3%         | 0.2%   | 3,571        | 7,103        | 3,532      | 11,112           | 0.5%  | 32.1%              | 63.9%                  | 31.8%           |
| Islander/Raizal                                                     | 0.0%         | 0.0%         | 0.0%   | 182          | 251          | 69         | 382              | 0.0%  | 47.6%              | 65.7%                  | 18.1%           |
| Other (Caucasian, Mestizo)                                          | 32.9%        | 49.9%        | 17.0%  | 743,469      | 1,126,671    | 383,202    | 1,890,491        | 83.7% | 39.3%              | 59.6%                  | 20.3%           |
| Palenque                                                            | 0.0%         | 0.0%         | 0.0%   | 29           | 176          | 147        | 245              | 0.0%  | 11.8%              | 71.8%                  | 60.0%           |
| N.D.                                                                | 0.6%         | 0.9%         | 0.2%   | 14,300       | 19,768       | 5,468      | 30,626           | 1.4%  | 46.7%              | 64.5%                  | 17.9%           |
| <b>Educational level</b>                                            |              |              |        |              |              |            |                  |       |                    |                        |                 |
| Graduate degree                                                     | 2.1%         | 2.7%         | 0.5%   | 47,785       | 60,019       | 12,234     | 72,441           | 3.2%  | 66.0%              | 82.9%                  | 16.9%           |
| Bachelor's degree                                                   | 7.4%         | 9.9%         | 2.5%   | 166,816      | 223,602      | 56,786     | 295,319          | 13.1% | 56.5%              | 75.7%                  | 19.2%           |
| Technical                                                           | 4.3%         | 6.5%         | 2.2%   | 97,733       | 147,634      | 49,901     | 244,160          | 10.8% | 40.0%              | 60.5%                  | 20.4%           |
| Middle                                                              | 8.7%         | 14.0%        | 5.3%   | 196,674      | 316,810      | 120,136    | 608,429          | 26.9% | 32.3%              | 52.1%                  | 19.7%           |
| High School                                                         | 4.7%         | 7.6%         | 2.9%   | 105,509      | 171,843      | 66,334     | 337,065          | 14.9% | 31.3%              | 51.0%                  | 19.7%           |
| Primary                                                             | 6.3%         | 10.5%        | 4.3%   | 141,309      | 237,344      | 96,035     | 468,206          | 20.7% | 30.2%              | 50.7%                  | 20.5%           |
| Pre-school                                                          | 0.5%         | 0.8%         | 0.3%   | 11,158       | 18,636       | 7,478      | 36,294           | 1.6%  | 30.7%              | 51.3%                  | 20.6%           |
| No data                                                             | 2.9%         | 4.6%         | 1.7%   | 64,998       | 104,432      | 39,434     | 196,909          | 8.7%  | 33.0%              | 53.0%                  | 20.0%           |
| <b>Literacy</b>                                                     |              |              |        |              |              |            |                  |       |                    |                        |                 |
| Literate                                                            | 33.8%        | 51.7%        | 17.9%  | 764,426      | 1,168,883    | 404,457    | 2,043,041        | 90.4% | 37.4%              | 57.2%                  | 19.8%           |
| No literacy                                                         | 0.8%         | 1.4%         | 0.6%   | 17,927       | 32,006       | 14,079     | 66,383           | 2.9%  | 27.0%              | 48.2%                  | 21.2%           |
| N.A.                                                                | 1.6%         | 2.7%         | 1.1%   | 36,401       | 61,180       | 24,779     | 121,140          | 5.4%  | 30.0%              | 50.5%                  | 20.5%           |
| N.D.                                                                | 0.6%         | 0.8%         | 0.2%   | 13,228       | 18,251       | 5,023      | 28,259           | 1.3%  | 46.8%              | 64.6%                  | 17.8%           |
| <b>Gender/Sex</b>                                                   |              |              |        |              |              |            |                  |       |                    |                        |                 |
| Female                                                              | 19.9%        | 30.5%        | 10.6%  | 449,188      | 688,160      | 238,972    | 1,208,617        | 53.5% | 37.2%              | 56.9%                  | 19.8%           |
| Male                                                                | 16.9%        | 26.2%        | 9.3%   | 382,794      | 592,160      | 209,366    | 1,050,206        | 46.5% | 36.4%              | 56.4%                  | 19.9%           |
| <b>Civil status</b>                                                 |              |              |        |              |              |            |                  |       |                    |                        |                 |
| Single                                                              | 13.4%        | 20.7%        | 7.3%   | 303,645      | 468,447      | 164,802    | 821,536          | 36.4% | 37.0%              | 57.0%                  | 20.1%           |
| Married or cohabitation                                             | 14.6%        | 22.6%        | 7.9%   | 330,460      | 509,814      | 179,354    | 896,958          | 39.7% | 36.8%              | 56.8%                  | 20.0%           |
| Divorced or separated                                               | 2.9%         | 4.2%         | 1.3%   | 65,978       | 95,928       | 29,950     | 163,980          | 7.3%  | 40.2%              | 58.5%                  | 18.3%           |
| Widow                                                               | 1.9%         | 2.6%         | 0.8%   | 42,743       | 59,804       | 17,061     | 95,611           | 4.2%  | 44.7%              | 62.5%                  | 17.8%           |
| N.A.                                                                | 3.4%         | 5.7%         | 2.3%   | 76,821       | 129,370      | 52,549     | 254,492          | 11.3% | 30.2%              | 50.8%                  | 20.6%           |
| N.D.                                                                | 0.5%         | 0.8%         | 0.2%   | 12,335       | 16,957       | 4,622      | 26,246           | 1.2%  | 47.0%              | 64.6%                  | 17.6%           |
| <b>Age</b>                                                          |              |              |        |              |              |            |                  |       |                    |                        |                 |
| 0-4                                                                 | 1.6%         | 50.5%        | 48.9%  | 36,401       | 61,180       | 24,779     | 121,140          | 5.4%  | 30.0%              | 50.5%                  | 20.5%           |
| 0-14                                                                | 5.4%         | 50.9%        | 45.6%  | 121,111      | 204,055      | 82,944     | 400,527          | 17.7% | 30.2%              | 50.9%                  | 20.7%           |
| 5-14                                                                | 3.8%         | 51.1%        | 47.4%  | 84,710       | 142,875      | 58,165     | 279,387          | 12.4% | 30.3%              | 51.1%                  | 20.8%           |
| 15-24                                                               | 5.3%         | 53.9%        | 48.6%  | 120,001      | 195,693      | 75,692     | 363,311          | 16.1% | 33.0%              | 53.9%                  | 20.8%           |
| 15-59                                                               | 23.8%        | 56.4%        | 32.7%  | 536,754      | 836,078      | 299,324    | 1,482,069        | 65.6% | 36.2%              | 56.4%                  | 20.2%           |
| 15-64                                                               | 25.9%        | 56.7%        | 30.8%  | 585,558      | 904,942      | 319,384    | 1,595,016        | 70.6% | 36.7%              | 56.7%                  | 20.0%           |
| 60+                                                                 | 7.7%         | 63.8%        | 56.1%  | 174,117      | 240,187      | 66,070     | 376,227          | 16.7% | 46.3%              | 63.8%                  | 17.6%           |
| 65+                                                                 | 5.5%         | 65.1%        | 59.5%  | 125,313      | 171,323      | 46,010     | 263,280          | 11.7% | 47.6%              | 65.1%                  | 17.5%           |
| 80+                                                                 | 1.5%         | 69.0%        | 67.6%  | 33,380       | 44,248       | 10,868     | 64,100           | 2.8%  | 52.1%              | 69.0%                  | 17.0%           |
|                                                                     | 36.8%        | 56.7%        | 19.8%  | 831,982      | 1,280,320    | 448,338    | 2,258,823        |       |                    |                        |                 |

## Limitations

The AMORE Platform used data modelling and clustering to estimate travel times between the origin and destination TAZ, lowering the cost of using big data and still delivering accessibility. Operational costs are thus low, and platform updates for monitoring and evaluation are affordable. The trade-off for affordability is imprecisions in estimates. These imprecisions are more likely to affect populations living near the 15-minute threshold and those further away from TAZ centroids with heavy traffic congestion. However, these imprecisions are unlikely to change the overall urban assessment.

Predicted travel times from the Google Distance Matrix API are accurate and are fed by big data from smartphones. Other databases, such as [Waze Transport SDK API](#), can be used to generate estimates, but these providers do not release prediction algorithms. It is thus impossible to know the magnitude and variations introduced by unforeseen events, like pandemic-related restrictions, and to estimate the impact of resulting errors or biases on estimates.

Colombian law requires hospitals to treat patients in emergencies. Modelling for this study assumed that people would resort to the hospital with the shortest travel time. But people may go to a different hospital if they know it better, their insurer recommends it or it has a good reputation. Our estimates are thus likely optimistic.

While choropleth maps allow users to explore the travel times from a specific TAZ, panels do not reflect that a origin of a journey will not always be the place of residence. This limitation will spread differently at different times and for diverse populations.

The relevance of our findings could change if the registered tertiary care facilities changed in REPS (i.e., a new institution opens, or an existing institution is reclassified as tertiary, changing the results). The interactive platform allows for prompt updates and reanalysis in response to these contingencies.

## Interpretation

The AMORE Platform reveals accessibility and its health equity implications, providing new dynamic data that accounts for the effects of traffic. It does so more precisely and at a fraction of the costs of household surveys and origin-destination studies, providing a new tool to inform service plans, programs, and policies.

Integrating publicly available data from public sources might be a breakthrough that improves evidence-informed decisions regarding the location and provision of health services. Visualisations might help stakeholders interpret the data and agree on a common objective and metric: painting the city green by covering its entire population and offering equitable accessibility to all people.

**Dynamic accessibility by car to tertiary care emergency services in Cali, Colombia, in 2020: cross-sectional equity analyses using travel-time big data from a Google API**

Updating the AMORE Platform is cheaper and faster than updating other origin-destination studies; its assessments are granular and sensitive to variations and can be used to monitor and evaluate changes. In emergencies such as earthquakes, a modified platform could provide a prompt situation analysis by feeding real-time data downloads rather than predictions.

These findings suggest that with congested traffic in peak hours, most Cali residents (63%) are beyond the 15-minute travel-time threshold by car to the nearest tertiary care emergency department. However, this figure fell to 43% when traffic congestion eased.

Reduced accessibility is unevenly distributed and reflects the inverse care law: people who live in low-income households or have less education face longer journeys to tertiary care emergency departments. Incidentally, heavy traffic also affects people on the periphery of Cali, including some high-income households, as congestion clogs roads they use to reach tertiary emergency care facilities.

Accessibility is one of many potential access barriers to health services and a critical one. Other factors that affect access to health care (e.g., rights, quality, or supplies) are meaningless if patients cannot reach tertiary emergency care in a crisis. Additional barriers to accessing health services (such as non-compliance with Colombian law, quality, and institutional and reputation) are beyond the scope of this study and merit consideration.

Researchers and planners can use data mining to optimise new tertiary care emergency services locations that maximise accessibility. Data mining could inform which existing institutions should be prioritised for an upgrade to improve accessibility or point at the optimal location for new ones, thus informing sound choices. These data are unique and provide an opportunity to enhance health services planning. Stakeholders and health equity advocates should encourage the integration of accessibility considerations in urban planning processes.

Planners and service providers wishing to combat social injustices must examine this new evidence that distance and congestion combine to exclude the most vulnerable and socioeconomically disadvantaged from critical health services. Planners and service providers must then consider bringing services closer to these populations. This new evidence and approach raise opportunities to address inequities, improve indicators, and engage stakeholders in urban planning. Future studies will examine the impact of this approach. This evidence supports planning using travel time and monitoring accessibility and equity when assessing the quality of health services.[45–47]

This situational analysis is insufficient to drive change. Integrating evidence about accessibility and equity into stakeholder and intersectoral dialogues, decision-making processes and other strategies that seek the social appropriation of knowledge by stakeholders and sectors might be catalysts for implementation.[33,48]

This report is part of the broader AMORE Project. Future reports will explore the potential of optimising the location of up to two new emergency departments. Future studies will assess

## Dynamic accessibility by car to tertiary care emergency services in Cali, Colombia, in 2020: cross-sectional equity analyses using travel-time big data from a Google API

the use and appropriation of data, and the advocacy of stakeholders, including those in the AMORE Project Collaborative Group.[10,49]

Interactive platforms can help decision-makers explore different assumptions and myriads of other results of combining different thresholds and traffic levels, allowing data to speak for itself.[50,51]

Looking ahead, identifying and proposing public policy plans and partnerships could improve health equity and bring hope to residents of Cali. These measures could also reduce social injustices, including the burden of the inverse care law that vulnerable populations pay more to access essential health services.[4,52,53]

### Generalisability and applicability

This study is reproducible in other settings with dynamic travel-time data (e.g., Waze or Google Maps) and georeferenced service and population data that make situational analyses accessible. Information accuracy depends on the accuracy of sources, the modelling used to conduct searches and maintaining data that is affordable and easy to interpret.

Travel times, infrastructure and populations change. Travel times and census data may thus need to be updated, and traffic clusters may need to be adjusted.

The proposed approach highlights the dynamic nature of travel times and uses TAZs to offer a granular assessment of the city. The scale of these assessments is suitable for informing short or long-term policies and plans and can be periodically revised as conditions change.

### Other information

These results test an approach to provide a situational analysis. Defining potential improvements by adding services and using data by decision-makers and other stakeholders are part of the broader AMORE Project and the subject of future reports. Travel time is a continuous variable and could be the subject of myriad analyses beyond the purpose of this study. Our aim is to demonstrate the possibility of conducting an affordable situational analysis with existing data providing information that decision-makers and other stakeholders might use; something to be assessed in future studies.

The web-based platform allows users to change assumptions or variables, explore different scenarios or perform sensitivity analyses. The possibilities are numerous and include expanding the study with more bivariate and multivariate analyses that go beyond the objectives of this report.

### Funding

This study has not yet received external funding; costs have been covered by the principal investigator plus additional in-kind contributions by IQuartil SAS and Team33 as part of their

## Dynamic accessibility by car to tertiary care emergency services in Cali, Colombia, in 2020: cross-sectional equity analyses using travel-time big data from a Google API

training with the DS4A data science program. The principal investigator covered the costs associated with downloading big data and the labour costs of producing an advanced prototype of the AMORE Platform.

### Ethical considerations

This observational study on quality improvement for health services planning does not research human subjects. It integrates anonymised coded secondary data sources obtained from publicly available open records.[54,55] This study has not been subject to ethical review. No identifiable private information was used in the study. Oversight of the project has been provided by the Doctoral Programme on Methodology of Biomedical Research and Public Health at the Department of Paediatrics, Obstetrics & Gynaecology and Preventative Medicine at the Universitat Autònoma de Barcelona. Contributors to this study are members of the AMORE Project Collaborative Group and public servants in their official capacity; they are listed in the acknowledgements.

### Contributions and acknowledgements

#### Authors and contributors

The corresponding author and principal investigator, Luis Gabriel Cuervo, led the project and manuscript writing and conceptualised the study with support from Daniel Cuervo and Ciro Jaramillo. Substantive additional contributions and editing of the report were provided by (in alphabetical order): María Olga Bula, Daniel Cuervo, Janet Hatcher-Roberts, Ciro Jaramillo Molina, Eliana Martínez-Herrera, Luis Fernando Pinilla, Felipe Piquero, and Lyda Osorio. All members of the AMORE Project Collaboration listed in Table 4 provided comments, conceptual contributions, or consumer perspectives. Those listed approved the manuscript, declared they stood by this research report and approved being recognised as members of the AMORE Project Collaboration.

#### Acknowledgements

We are grateful to Stephen Volante CT, an American Translators Association member, for his editing support and María Fernanda Merino for providing strategic guidance. IQuartil SAS has hosted the AMORE Platform, and we are incredibly grateful to Pablo Zapata and Lizardo Vanegas for improvements to the AMORE Platform and the AMORE Project website. The development of the AMORE Platform used for this study was led by Luis Gabriel Cuervo, Daniel Cuervo, Luis Fernando Pinilla, and Pablo Zapata. An early prototype of the AMORE Platform was developed under the guidance of the principal investigator (LGC) by Team 33 of the 2020 cohort of the Data Science for All – Correlation Once certificate training program.[56,57] Members of Team 33 included Daniel Cuervo, Catherine Cabrera, Dario Mogollón, Juan G. Betancourt, Stephanie Rojas, Rafael Roper, and Santiago Tobar. This work has been carried out within the framework of the doctorate in Methodology of Biomedical Research and Public Health of the Universitat Autònoma de Barcelona.

**Dynamic accessibility by car to tertiary care emergency services in Cali, Colombia, in 2020: cross-sectional equity analyses using travel-time big data from a Google API**

Table 4 Contributions by Members of the AMORE Project Collaboration approving the manuscript

| Surname           | Given name      | Draft writing | Revision & comments | Conceptual contributions | User perspectives | Stands by manuscript | Approved final version |
|-------------------|-----------------|---------------|---------------------|--------------------------|-------------------|----------------------|------------------------|
| Agredo Lemos      | Freddy Enrique  |               | ●                   | ●                        | ●                 | ●                    | ●                      |
| Avila Rodriguez   | German          |               |                     |                          | ●                 | ●                    | ●                      |
| Bula              | María Olga      | ●             | ●                   | ●                        | ●                 | ●                    | ●                      |
|                   |                 |               |                     | ●                        | ●                 | ●                    | ●                      |
| Cuervo            | Daniel          | ●             | ●                   | ●                        |                   | ●                    | ●                      |
| Cuervo            | Luis Gabriel    | ●             | ●                   | ●                        |                   | ●                    | ●                      |
| Franco            | Oscar           |               |                     | ●                        |                   | ●                    | ●                      |
| Garcia            | Crhistian       |               |                     | ●                        | ●                 | ●                    | ●                      |
| Guerrero          | Rodrigo         |               | ●                   | ●                        | ●                 | ●                    | ●                      |
| Hatcher-Roberts   | Janet           | ●             | ●                   | ●                        |                   | ●                    | ●                      |
| Jaramillo         | Ciro            | ●             | ●                   | ●                        | ●                 | ●                    | ●                      |
| Martínez Arámbula | Fernando Rafael |               |                     | ●                        |                   | ●                    | ●                      |
| Martínez Herrera  | Eliana          | ●             | ●                   | ●                        | ●                 | ●                    | ●                      |
| Merino Juarez     | Maria Fernanda  |               | ●                   | ●                        |                   | ●                    | ●                      |
| Osorio            | Lyda            |               | ●                   | ●                        | ●                 | ●                    | ●                      |
| Ospina            | Maria B         |               |                     | ●                        | ●                 | ●                    | ●                      |
| Paredes           | Gabriel         | ●             |                     | ●                        |                   | ●                    | ●                      |
| Paredes-Zapata    | David           |               | ●                   | ●                        | ●                 | ●                    | ●                      |
| Pinilla           | Luis Fernando   | ●             | ●                   | ●                        | ●                 | ●                    | ●                      |
| Piquero           | Felipe          | ●             | ●                   |                          | ●                 | ●                    | ●                      |
| Rojas             | Oscar           |               | ●                   |                          | ●                 | ●                    | ●                      |
| Rosero Hernández  | Myriam          |               |                     | ●                        |                   | ●                    | ●                      |
| Tobar-Blandón     | Maria Fernanda  |               | ●                   |                          | ●                 | ●                    | ●                      |
| Zapata Murillo    | Pablo           |               |                     | ●                        |                   | ●                    | ●                      |



Dynamic accessibility by car to tertiary care emergency services in Cali, Colombia, in 2020: cross-sectional equity analyses using travel-time big data from a Google API

## Competing interests

All authors have completed the ICMJE uniform disclosure form and declare: no financial support from any organisation for the submitted work; IQuartil SAS provided technical support to develop the AMORE Platform and was subsidised by the PI (LGC) for consulting services; DC is a partner at IQuartil SAS and a sibling to LGC. LFP gave technical support at IQuartil SAS until March 2021.

LGC contributed to this work in his personal capacity and time. The views expressed in this article do not necessarily represent the decisions or policies of his employer, PAHO/WHO. Reproductions of this article should not include any suggestion that PAHO/WHO endorsed this research or is endorsing any specific organisation, services, or products. COI Declaration by other members of the AMORE Project Collaborative Group signing off the manuscript: FRMA is an engineer on roads and transportation who participated in his personal capacity and time; his contributions do not necessarily reflect the policies or decisions of his employer, the Municipality of Santiago de Cali. MFMJ participated in her personal capacity and time, and her contributions do not necessarily reflect the policies or decisions of her employer. PZM is a consultant at IQuartil SAS.

## Data availability statement

The data sources used in this study are in the public domain. The links to the sources are provided (see Study design), and the data constitutes a negligible risk to confidentiality; Colombia's census microdata was anonymised at the source. Neither Google Maps Distance Matrix API nor REPS include personal information (see Ethical considerations). Data from the AMORE Platform relevant to this publication will be made available after the publication of this manuscript at <https://www.iquartil.net/proyectoAMORE/>.

## References

- 1 Ma L, Luo N, Wan T, *et al*. An Improved Healthcare Accessibility Measure Considering the Temporal Dimension and Population Demand of Different Ages. *Int J Environ Res Public Health* 2018;**15**. doi:10.3390/ijerph15112421
- 2 Levesque J-F, Harris MF, Russell G. Patient-centred access to health care: conceptualising access at the interface of health systems and populations. *Int J Equity Health* 2013;**12**:18. doi:10.1186/1475-9276-12-18



Dynamic accessibility by car to tertiary care emergency services in Cali, Colombia, in 2020: cross-sectional equity analyses using travel-time big data from a Google API

- 3 Gao X, Kelley DW. Understanding how distance to facility and quality of care affect maternal health service utilization in Kenya and Haiti: A comparative geographic information system study. *Geospatial Health* 2019;**14**. doi:10.4081/gh.2019.690
- 4 Frenk J. The concept and measurement of accessibility. In: White K, ed. *Health Services Research: an anthology*. Washington DC: : Pan American Health Organization / World Health Organization 1992. 8–42855. [https://www.researchgate.net/profile/Julio-Frenk/publication/19080047\\_Concept\\_and\\_measurement\\_of\\_accessibility/links/5575db2708ae75363751a314/Concept-and-measurement-of-accessibility.pdf](https://www.researchgate.net/profile/Julio-Frenk/publication/19080047_Concept_and_measurement_of_accessibility/links/5575db2708ae75363751a314/Concept-and-measurement-of-accessibility.pdf)
- 5 Wang F. Measurement, Optimization, and Impact of Health Care Accessibility: A Methodological Review. *Ann Assoc Am Geogr* 2012;**102**:1104–12. doi:10.1080/00045608.2012.657146
- 6 Páez A, Scott DM, Morency C. Measuring accessibility: positive and normative implementations of various accessibility indicators. *J Transp Geogr* 2012;**25**:141–53. doi:10.1016/j.jtrangeo.2012.03.016
- 7 Bureau of Transportation Statistics. Transportation Statistics Annual Report 1997: mobility and access. US Department of Transportation 1997. [https://www.bts.dot.gov/archive/publications/transportation\\_statistics\\_annual\\_report/1997/index](https://www.bts.dot.gov/archive/publications/transportation_statistics_annual_report/1997/index)
- 8 Moya-Gómez B, Salas-Olmedo MH, García-Palomares J, *et al*. Dynamic Accessibility using Big Data: The Role of the Changing Conditions of Network Congestion and Destination Attractiveness. *Netw Spat Econ* 2018;**18**. doi:10.1007/s11067-017-9348-z
- 9 McCollum R, Taegtmeier M, Otiso L, *et al*. Healthcare equity analysis: applying the Tanahashi model of health service coverage to community health systems following devolution in Kenya. *Int J Equity Health* 2019;**18**:65. doi:10.1186/s12939-019-0967-5
- 10 Cuervo LG, Martínez-Herrera E, Cuervo D, *et al*. Improving equity using dynamic geographic accessibility data for urban health services planning. *Gac Sanit* Published Online First: 11 June 2022. doi:10.1016/j.gaceta.2022.05.001
- 11 Kong X, Liu Y, Wang Y, *et al*. Investigating Public Facility Characteristics from a Spatial Interaction Perspective: A Case Study of Beijing Hospitals Using Taxi Data. *ISPRS Int J Geo-Inf* 2017;**6**:38. doi:10.3390/ijgi6020038
- 12 Neutens T. Accessibility, equity and health care: review and research directions for transport geographers. *J Transp Geogr* 2015;**43**:14–27. doi:10.1016/j.jtrangeo.2014.12.006
- 13 Unión Temporal UT SDG-CNC. Encuesta de movilidad de hogares Cali 2015: Producto 3. Ámbito y zonificación. 2015. <https://www.metrocali.gov.co/wp/wp-content/uploads/2019/02/Encuesta-de-movilidad-2015.pdf> (accessed 30 May 2020).

Dynamic accessibility by car to tertiary care emergency services in Cali, Colombia, in 2020: cross-sectional equity analyses using travel-time big data from a Google API

- 14 Crítica Urbana. Comprender para transformar, entrevista a Oriol Nel·lo. 2018. <https://youtu.be/AHw6F72HqGQ> (accessed 17 Aug 2020).
- 15 Acosta A. Smart Cities & Inequidad: *Forbes Repúb Dominic* 2021;**82**:12.[https://issuu.com/forbeslatam/docs/forbes\\_rd\\_julio\\_/12](https://issuu.com/forbeslatam/docs/forbes_rd_julio_/12) (accessed 17 Jul 2021).
- 16 Wang J, Du F, Huang J, *et al*. Access to hospitals: Potential vs. observed. *Cities* 2020;**100**:102671. doi:10.1016/j.cities.2020.102671
- 17 Śleszyński P, Olszewski P, Dybicz T, *et al*. The ideal isochrone: Assessing the efficiency of transport systems. *Res Transp Bus Manag* 2022;:100779. doi:10.1016/j.rtbm.2021.100779
- 18 Whitty CJM. What makes an academic paper useful for health policy? *BMC Med* 2015;**13**:301. doi:10.1186/s12916-015-0544-8
- 19 Tiempo CEE. ¡Atención, Cali! Así será la cuarentena hasta el 15 de junio. *El Tiempo*. 2020.<https://www.eltiempo.com/colombia/cali/como-sera-la-cuarentena-en-cali-hasta-el-15-de-junio-y-cuales-son-las-medidas-501404> (accessed 7 Nov 2021).
- 20 Cuarentena en Cali: ¿continúa la Ley Seca y el toque de queda con la extensión? *Colomb*. 2020.[https://colombia.as.com/colombia/2020/08/02/actualidad/1596387072\\_578129.html](https://colombia.as.com/colombia/2020/08/02/actualidad/1596387072_578129.html) (accessed 7 Nov 2021).
- 21 Colombia mantiene cuarentena hasta el 30 de noviembre. *Temas Colomb*. 2020.<https://temascolombia.com/colombia-mantiene-cuarentena-hasta-el-30-de-noviembre/> (accessed 7 Nov 2021).
- 22 Dirección de Censos y Demografía - DCD,, Departamento Administrativo Nacional de Estadística - DANE. COLOMBIA - Censo Nacional de Población y Vivienda - CNPV - 2018. Bogotá: : Departamento Administrativo Nacional de Estadística - DANE 2020. <http://microdatos.dane.gov.co/index.php/catalog/643/study-description>
- 23 DANE. Información técnica y omisión censal 2018, aspectos conceptuales y metodológicos. 2019.<https://www.dane.gov.co/index.php/estadisticas-por-tema/demografia-y-poblacion/censo-nacional-de-poblacion-y-vivenda-2018/informacion-tecnica> (accessed 10 Sep 2020).
- 24 DANE, Sistema Estadístico Nacional - SEN. Información del DANE para la toma de decisiones regionales: Cali - Valle del Cauca. Colombia - Cali: : DANE 2021. <https://www.dane.gov.co/index.php/estadisticas-por-tema/informacion-regional/informacion-estadistica-desagregada-con-enfoque-territorial-y-diferencial/informacion-del-dane-para-la-toma-de-decisiones-en-departamentos-y-ciudades-capitales> (accessed 24 Apr 2021).

Dynamic accessibility by car to tertiary care emergency services in Cali, Colombia, in 2020: cross-sectional equity analyses using travel-time big data from a Google API

- 25 Cali emerges as epicentre of unrest in ongoing Colombia protests | Protests News | Al Jazeera. <https://www.aljazeera.com/news/2021/5/11/cali-emerges-as-epicentre-of-colombias-ongoing-unrest> (accessed 11 Oct 2021).
- 26 Colombia protests: UN calls for investigation into Cali deaths. BBC News. 2021. <https://www.bbc.com/news/world-latin-america-57300639> (accessed 9 Jan 2022).
- 27 Cali Distrito se moverá entre siete y ocho localidades. <http://www.cali.gov.co/publicaciones/146733/cali-distrito-se-movera-entre-siete-y-ocho-localidades/> (accessed 24 Apr 2021).
- 28 Cali Distrito Especial tendría seis localidades. <http://www.cali.gov.co/publicaciones/148406/cali-distrito-especial-tendria-seis-localidades/> (accessed 31 Mar 2021).
- 29 Google Maps. Location of emergency departments of high-complexity hospitals in Cali, Colombia, 2021. 2021. <https://tinyurl.com/445fcyz> (accessed 25 Sep 2021).
- 30 Mapas de Comunas. [http://www.cali.gov.co/publicaciones/115924/mapas\\_comunas\\_idesc/](http://www.cali.gov.co/publicaciones/115924/mapas_comunas_idesc/) (accessed 30 May 2020).
- 31 Distance Matrix API – APIs & Services – Google Cloud Platform. <https://console.cloud.google.com/apis/library/distance-matrix-backend.googleapis.com?filter=solution-type:service&filter=visibility:public&filter=category:maps&id=82aa0d98-49bb-4855-9da9-efde390a3834&folder=true&organizationId=true&supportedpurview=project> (accessed 22 Jul 2020).
- 32 Abimbola S. Beyond positive a priori bias: reframing community engagement in LMICs. *Health Promot Int* 2020;**35**:598–609. doi:10.1093/heapro/daz023
- 33 Jull J, Giles A, Graham ID. Community-based participatory research and integrated knowledge translation: advancing the co-creation of knowledge. *Implement Sci* 2017;**12**:150. doi:10.1186/s13012-017-0696-3
- 34 O’Neill J, Tabish H, Welch V, *et al*. Applying an equity lens to interventions: using PROGRESS ensures consideration of socially stratifying factors to illuminate inequities in health. *J Clin Epidemiol* 2014;**67**:56–64. doi:10.1016/j.jclinepi.2013.08.005
- 35 Censo Nacional de Población y Vivienda 2018. <https://www.dane.gov.co/index.php/estadisticas-por-tema/demografia-y-poblacion/censo-nacional-de-poblacion-y-vivenda-2018> (accessed 23 Jul 2020).
- 36 DANE. Proyecciones de población. 2020. <https://www.dane.gov.co/index.php/estadisticas-por-tema/demografia-y-poblacion/proyecciones-de-poblacion> (accessed 16 Jun 2022).

Dynamic accessibility by car to tertiary care emergency services in Cali, Colombia, in 2020: cross-sectional equity analyses using travel-time big data from a Google API

- 37 DANE, Sistema Estadístico Nacional - SEN. Información del DANE para la toma de decisiones de las ciudades capitales: Cali - Valle del Cauca. Colombia - Cali: : DANE 2020. <https://www.dane.gov.co/index.php/estadisticas-por-tema/informacion-regional/informacion-estadistica-desagregada-con-enfoque-territorial-y-diferencial/informacion-del-dane-para-la-toma-de-decisiones-en-departamentos-y-ciudades-capitales> (accessed 24 Apr 2021).
- 38 Cantillo V, Ortúzar J de D. Restricting the use of cars by license plate numbers: A misguided urban transport policy. *DYNA* 2014;**81**:75–82. doi:10.15446/dyna.v81n188.40081
- 39 Broccoli MC, Moresky R, Dixon J, *et al.* Defining quality indicators for emergency care delivery: findings of an expert consensus process by emergency care practitioners in Africa. *BMJ Glob Health* 2018;**3**:e000479. doi:10.1136/bmjgh-2017-000479
- 40 Aringhieri R, Bruni ME, Khodaparasti S, *et al.* Emergency medical services and beyond: Addressing new challenges through a wide literature review. *Comput Oper Res* 2017;**78**:349–68. doi:10.1016/j.cor.2016.09.016
- 41 Karrison TG, Philip Schumm L, Kocherginsky M, *et al.* Effects of driving distance and transport time on mortality among Level I and II traumas occurring in a metropolitan area. *J Trauma Acute Care Surg* 2018;**85**:756–65. doi:10.1097/TA.0000000000002041
- 42 Kavanagh J, Oliver S, Lorenc T. Reflections on developing and using PROGRESS-Plus. *Equity Update* 2008;**2**:1–3. [https://www.researchgate.net/publication/285979865\\_Reflections\\_on\\_developing\\_and\\_using\\_PROGRESS-Plus/citation/download](https://www.researchgate.net/publication/285979865_Reflections_on_developing_and_using_PROGRESS-Plus/citation/download)
- 43 PROGRESS-Plus | Cochrane Equity. <https://methods.cochrane.org/equity/projects/evidence-equity/progress-plus> (accessed 23 Mar 2020).
- 44 STROBE-Equity. <https://methods.cochrane.org/equity/projects/strobe-equity> (accessed 12 Jan 2022).
- 45 Sa TH de, Mwaura A, Vert C, *et al.* Urban design is key to healthy environments for all. *Lancet Glob Health* 2022;**10**:e786–7. doi:10.1016/S2214-109X(22)00202-9
- 46 Giles-Corti B, Moudon AV, Lowe M, *et al.* Creating healthy and sustainable cities: what gets measured, gets done. *Lancet Glob Health* 2022;**10**:e782–5. doi:10.1016/S2214-109X(22)00070-5
- 47 Aaronson EL, Marsh RH, Guha M, *et al.* Emergency department quality and safety indicators in resource-limited settings: an environmental survey. *Int J Emerg Med* 2015;**8**:39. doi:10.1186/s12245-015-0088-x

Dynamic accessibility by car to tertiary care emergency services in Cali, Colombia, in 2020: cross-sectional equity analyses using travel-time big data from a Google API

- 1  
2  
3  
48 Boyko JA, Lavis JN, Dobbins M. Deliberative Dialogues as a Strategy for System-Level Knowledge Translation and Exchange. *Healthc Policy* 2014;**9**:122–31. <https://www.ncbi.nlm.nih.gov/pmc/articles/PMC4749889/> (accessed 10 Oct 2020).  
5  
6  
7  
8  
49 Cuervo LG. AMORE Project - to improve health equity by reducing the travel time to essential health services. Bethesda, MD, USA: 2021. [https://youtu.be/\\_cDMAULJMTc](https://youtu.be/_cDMAULJMTc) (accessed 23 Sep 2021).  
9  
10  
11  
12  
50 Whitty CJM. What makes an academic paper useful for health policy? *BMC Med* 2015;**13**:301. doi:10.1186/s12916-015-0544-8  
13  
14  
15  
51 Armstrong K. Big data: a revolution that will transform how we live, work, and think. *Inf Commun Soc* 2014;**17**:1300–2. doi:10.1080/1369118X.2014.923482  
16  
17  
18  
19  
52 Fiscella K, Shin P. The Inverse Care Law: Implications for Healthcare of Vulnerable Populations. *J Ambulatory Care Manage* 2005;**28**:304–12. [https://journals.lww.com/ambulatorycaremanagement/Abstract/2005/10000/The\\_Inverse\\_Care\\_Law\\_\\_Implications\\_for\\_Healthcare.5.aspx](https://journals.lww.com/ambulatorycaremanagement/Abstract/2005/10000/The_Inverse_Care_Law__Implications_for_Healthcare.5.aspx) (accessed 28 Mar 2021).  
20  
21  
22  
23  
24  
25  
53 Hart JT. The inverse care law. *The Lancet* 1971;**297**:405–12. doi:10.1016/S0140-6736(71)92410-X  
26  
27  
28  
29  
54 Ministerio de Salud. Resolución 8430 de 1993: Normas científicas, técnicas y administrativas para la investigación en salud. 1993. <https://www.minsalud.gov.co/sites/rid/Lists/BibliotecaDigital/RIDE/DE/DIJ/RESOLUCION-8430-DE-1993.pdf>  
30  
31  
32  
33  
34  
35  
55 World Health Organization, Council for International Organizations of Medical Sciences. *International ethical guidelines for health-related research involving humans*. Geneva: : CIOMS 2017. [https://www.who.int/docs/default-source/ethics/web-cioms-ethicalguidelines.pdf?sfvrsn=f62ee074\\_0](https://www.who.int/docs/default-source/ethics/web-cioms-ethicalguidelines.pdf?sfvrsn=f62ee074_0)  
36  
37  
38  
39  
40  
41  
56 Data Science Training | Data Science for All: Colombia | C1 Insights. <https://www.correlation-one.com/blog/data-science-for-all-colombia-graduates-500-new-data-professionals> (accessed 14 May 2021).  
42  
43  
44  
45  
57 Ministerio de Tecnología y Comunicaciones de Colombia. DS4A Colombia 2020 / Grand Finale. 2020. <https://youtu.be/sdJWz9BqiQ?t=7362> (accessed 16 Aug 2020).  
46  
47  
48  
49  
50  
51  
52  
53  
54  
55  
56  
57  
58  
59  
60

1  
2  
3  
4  
5  
6  
7  
8  
9  
10  
11  
12  
13  
14  
15  
16  
17  
18  
19  
20  
21  
22  
23  
24  
25  
26  
27  
28  
29  
30  
31  
32  
33  
34  
35  
36  
37  
38  
39  
40  
41  
42  
43  
44  
45  
46  
47  
48  
49  
50  
51  
52  
53  
54  
55  
56  
57  
58  
59  
60

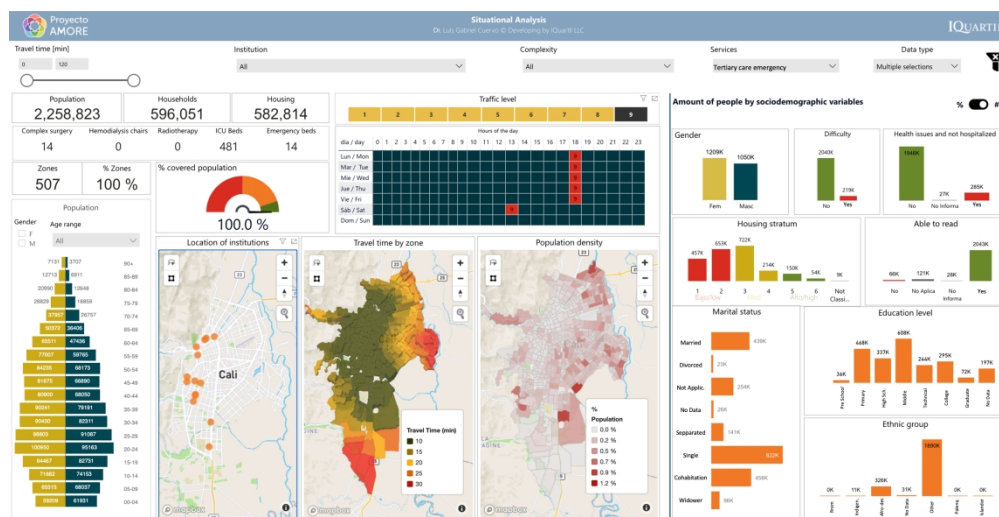

Figure 1, AMORE Platform situational analysis

338x190mm (222 x 222 DPI)



1  
2  
3  
4  
5  
6  
7  
8  
9  
10  
11  
12  
13  
14  
15  
16  
17  
18  
19  
20  
21  
22  
23  
24  
25  
26  
27  
28  
29  
30  
31  
32  
33  
34  
35  
36  
37  
38  
39  
40  
41  
42  
43  
44  
45  
46  
47  
48  
49  
50  
51  
52  
53  
54  
55  
56  
57  
58  
59  
60

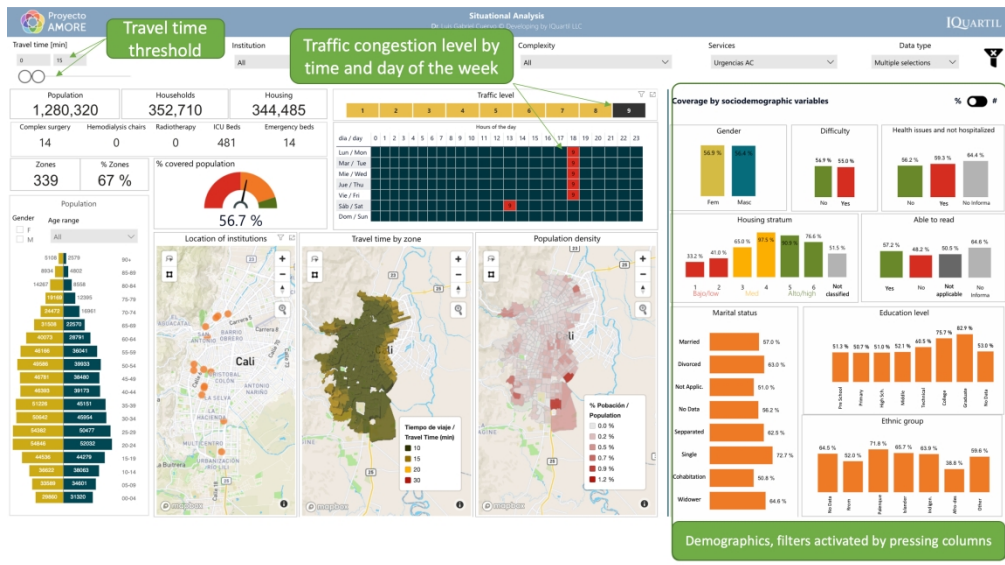

Figure 2, Situational analysis, filters and visualizations, Nov 2020

338x190mm (222 x 222 DPI)



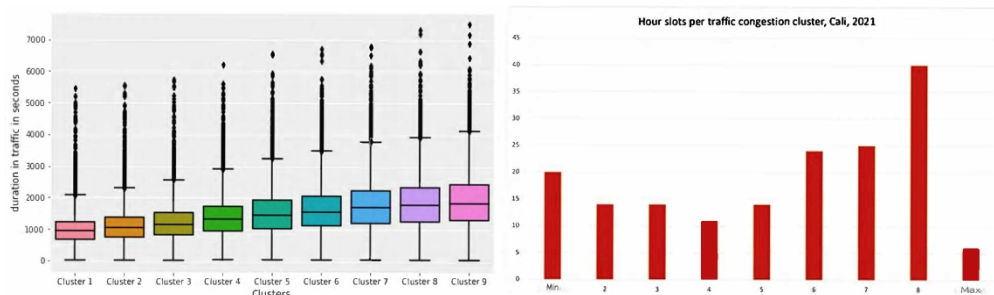

Figure 3, Travel-time clusters from free flow to peak traffic, by time and day

337x99mm (221 x 222 DPI)



Figure 4, Accessibility by income to tertiary care comparing July and November 2020

284x186mm (222 x 222 DPI)



Figure 5, Accessibility by sociodemographic characteristics in July and November 2020

338x190mm (222 x 222 DPI)

1  
2  
3  
4  
5  
6  
7  
8  
9  
10  
11  
12  
13  
14  
15  
16  
17  
18  
19  
20  
21  
22  
23  
24  
25  
26  
27  
28  
29  
30  
31  
32  
33  
34  
35  
36  
37  
38  
39  
40  
41  
42  
43  
44  
45  
46  
47  
48  
49  
50  
51  
52  
53  
54  
55  
56  
57  
58  
59  
60

Impact of traffic congestion on accessibility to tertiary care emergencies, by economic stratum of the dwelling

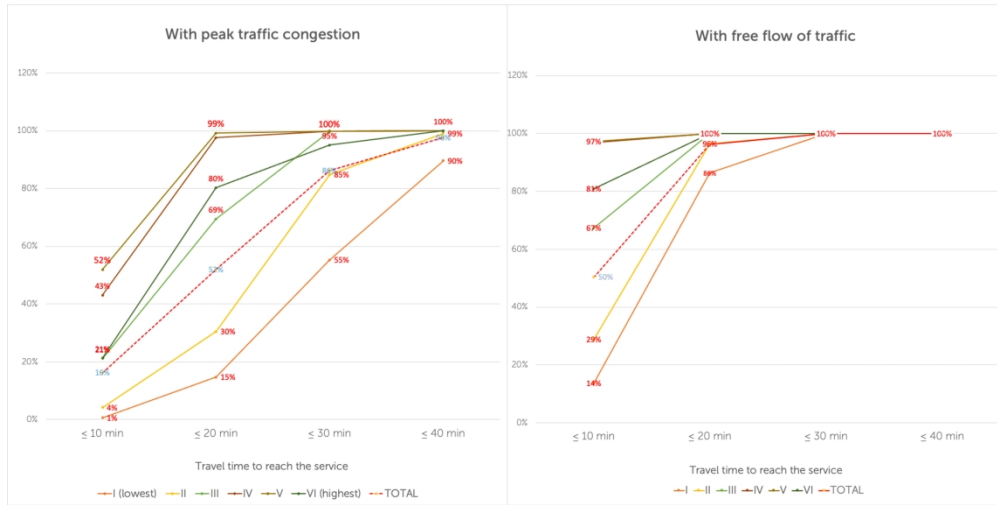

Figure 6 Impact of traffic congestion on accessibility, by economic stratum, July 2020

338x190mm (300 x 300 DPI)

1  
2  
3  
4  
5  
6  
7  
8  
9  
10  
11  
12  
13  
14  
15  
16  
17  
18  
19  
20  
21  
22  
23  
24  
25  
26  
27  
28  
29  
30  
31  
32  
33  
34  
35  
36  
37  
38  
39  
40  
41  
42  
43  
44  
45  
46  
47  
48  
49  
50  
51  
52  
53  
54  
55  
56  
57  
58  
59  
60

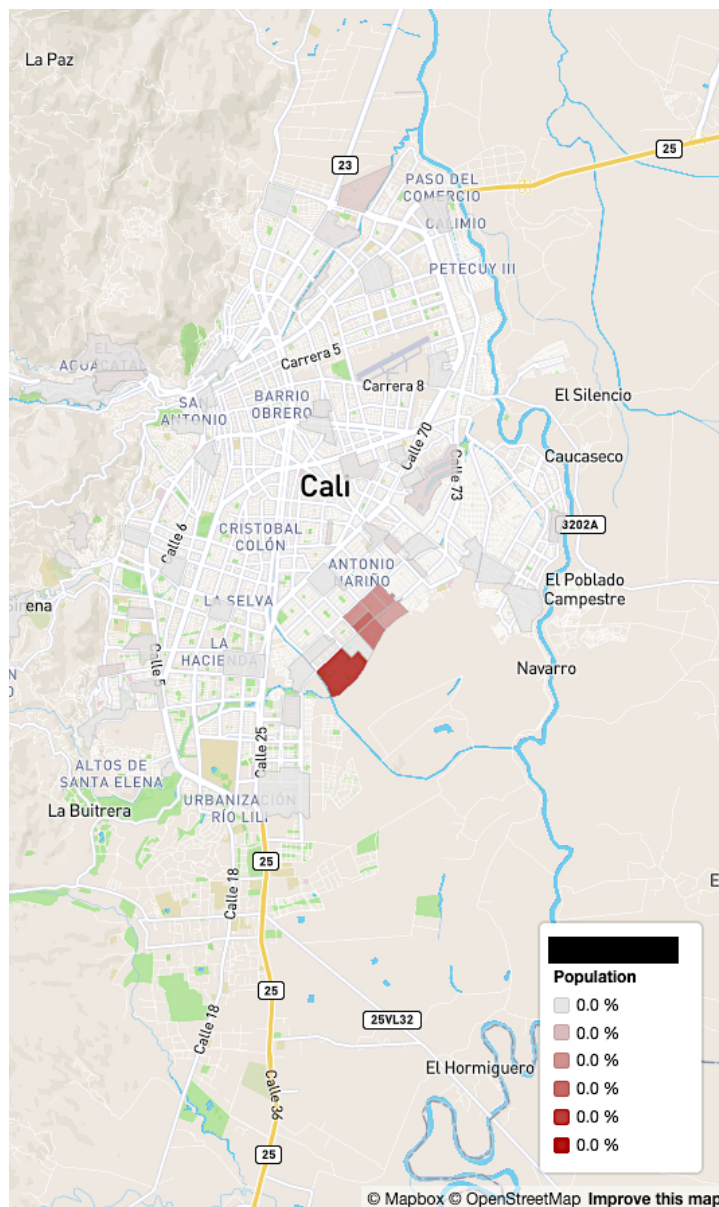

Figure 7, Location of the Palenque people

188x314mm (72 x 72 DPI)

1  
2  
3  
4  
5  
6  
7  
8  
9  
10  
11  
12  
13  
14  
15  
16  
17  
18  
19  
20  
21  
22  
23  
24  
25  
26  
27  
28  
29  
30  
31  
32  
33  
34  
35  
36  
37  
38  
39  
40  
41  
42  
43  
44  
45  
46  
47  
48  
49  
50  
51  
52  
53  
54  
55  
56  
57  
58  
59  
60

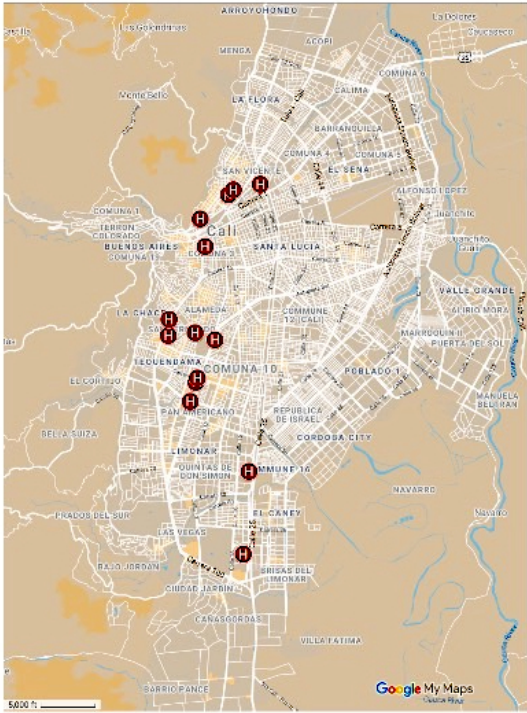

| <b>Institution</b>                                             |
|----------------------------------------------------------------|
| <b>Centro Médico Imbanaco</b>                                  |
| <b>Clínica Amiga</b>                                           |
| <b>Clínica Colombia ES</b>                                     |
| <b>Clínica Colsanitas S.A. Sebastián de Belalcazar</b>         |
| <b>Clínica de Occidente</b>                                    |
| <b>Clínica Esensa</b>                                          |
| <b>Clínica Farallones S.A.</b>                                 |
| <b>Clínica Nuestra</b>                                         |
| <b>Clínica Nuestra Señora de los Remedios</b>                  |
| <b>Clínica Nueva de Cali SAS Sede La Quinta</b>                |
| <b>Clínica Rey David</b>                                       |
| <b>DIME Clínica Neurocardiovascular S.A.</b>                   |
| <b>Hospital Universitario del Valle Evaristo García E.S.E.</b> |
| <b>Fundación Valle de Lilí</b>                                 |

228x168mm (81 x 81 DPI)

1  
2  
3  
4  
5  
6  
7  
8  
9  
10  
11  
12  
13  
14  
15  
16  
17  
18  
19  
20  
21  
22  
23  
24  
25  
26  
27  
28  
29  
30  
31  
32  
33  
34  
35  
36  
37  
38  
39  
40  
41  
42  
43  
44  
45  
46  
47  
48  
49  
50  
51  
52  
53  
54  
55  
56  
57  
58  
59  
60

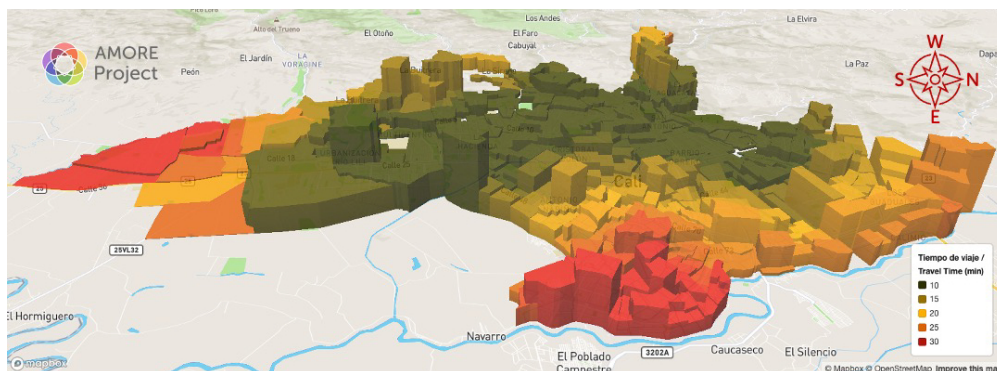

338x123mm (81 x 81 DPI)



1  
2  
3  
4  
5  
6  
7  
8  
9  
10  
11  
12  
13  
14  
15  
16  
17  
18  
19  
20  
21  
22  
23  
24  
25  
26  
27  
28  
29  
30  
31  
32  
33  
34  
35  
36  
37  
38  
39  
40  
41  
42  
43  
44  
45  
46  
47  
48  
49  
50  
51  
52  
53  
54  
55  
56  
57  
58  
59  
60

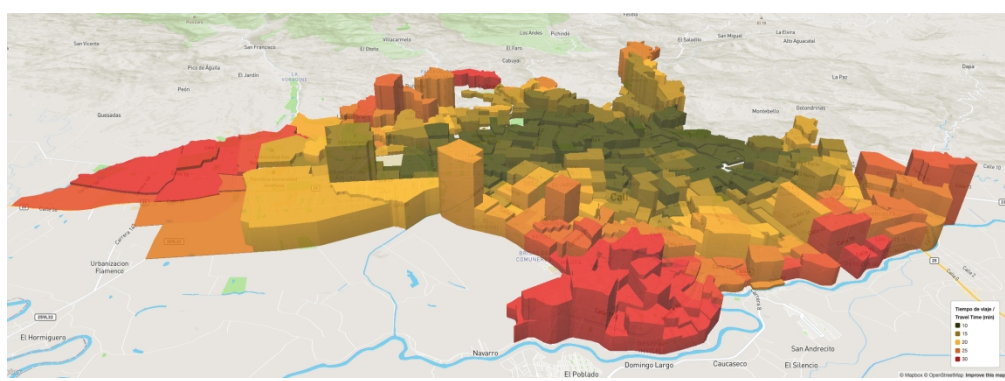

879x320mm (72 x 72 DPI)

## Cross-sectional equity analysis of accessibility by automobile to tertiary care emergency services in Cali, Colombia in 2020

STROBE Statement—Checklist of items that should be included in reports of *cross-sectional studies*

|                              | Item No | Recommendation                                                                                                                                                                                       | Page No   |
|------------------------------|---------|------------------------------------------------------------------------------------------------------------------------------------------------------------------------------------------------------|-----------|
| <b>Title and abstract</b>    | 1       | (a) Indicate the study's design with a commonly used term in the title or the abstract                                                                                                               | 1         |
|                              |         | (b) Provide in the abstract an informative and balanced summary of what was done and what was found                                                                                                  | 1         |
| <b>Introduction</b>          |         |                                                                                                                                                                                                      |           |
| Background/rationale         | 2       | Explain the scientific background and rationale for the investigation being reported                                                                                                                 | 2         |
| Objectives                   | 3       | State specific objectives, including any prespecified hypotheses                                                                                                                                     | 3         |
| <b>Methods</b>               |         |                                                                                                                                                                                                      |           |
| Study design                 | 4       | Present key elements of study design early in the paper                                                                                                                                              | 4         |
| Setting                      | 5       | Describe the setting, locations, and relevant dates, including periods of recruitment, exposure, follow-up, and data collection                                                                      | 4         |
| Participants                 | 6       | (a) Give the eligibility criteria, and the sources and methods of selection of participants                                                                                                          | 4         |
| Variables                    | 7       | Clearly define all outcomes, exposures, predictors, potential confounders, and effect modifiers. Give diagnostic criteria, if applicable                                                             | 7         |
| Data sources/<br>measurement | 8*      | For each variable of interest, give sources of data and details of methods of assessment (measurement). Describe comparability of assessment methods if there is more than one group                 | 7         |
| Bias                         | 9       | Describe any efforts to address potential sources of bias                                                                                                                                            | 8         |
| Study size                   | 10      | Explain how the study size was arrived at                                                                                                                                                            | 3, 8      |
| Quantitative variables       | 11      | Explain how quantitative variables were handled in the analyses. If applicable, describe which groupings were chosen and why                                                                         | 7, 10, 13 |
| Statistical methods          | 12      | (a) Describe all statistical methods, including those used to control for confounding                                                                                                                | 6, 10     |
|                              |         | (b) Describe any methods used to examine subgroups and interactions                                                                                                                                  | 6, 10     |
|                              |         | (c) Explain how missing data were addressed                                                                                                                                                          | 7, 10, 13 |
|                              |         | (d) If applicable, describe analytical methods taking account of sampling strategy                                                                                                                   |           |
|                              |         | (e) Describe any sensitivity analyses                                                                                                                                                                |           |
| <b>Results</b>               |         |                                                                                                                                                                                                      |           |
| Participants                 | 13*     | (a) Report numbers of individuals at each stage of study—e.g., numbers potentially eligible, examined for eligibility, confirmed eligible, included in the study, completing follow-up, and analyzed | 13        |
|                              |         | (b) Give reasons for non-participation at each stage                                                                                                                                                 | 8         |
|                              |         | (c) Consider use of a flow diagram                                                                                                                                                                   |           |
| Descriptive data             | 14*     | (a) Give characteristics of study participants (e.g., demographic, clinical, social) and information on exposures and potential confounders                                                          | 13        |
|                              |         | (b) Indicate number of participants with missing data for each variable of interest                                                                                                                  | 13        |
| Outcome data                 | 15*     | Report numbers of outcome events or summary measures                                                                                                                                                 | 8-13      |

## Cross-sectional equity analysis of accessibility by automobile to tertiary care emergency services in Cali, Colombia in 2020

|    |              |    |                                                                                                                                                                                                                |
|----|--------------|----|----------------------------------------------------------------------------------------------------------------------------------------------------------------------------------------------------------------|
| 1  |              |    |                                                                                                                                                                                                                |
| 2  |              |    |                                                                                                                                                                                                                |
| 3  | Main results | 16 | (a) Give unadjusted estimates and, if applicable, confounder-adjusted estimates and their precision (e.g., 95% confidence interval). Make clear which confounders were adjusted for and why they were included |
| 4  |              |    | 13                                                                                                                                                                                                             |
| 5  |              |    |                                                                                                                                                                                                                |
| 6  |              |    |                                                                                                                                                                                                                |
| 7  |              |    |                                                                                                                                                                                                                |
| 8  |              |    |                                                                                                                                                                                                                |
| 9  |              |    |                                                                                                                                                                                                                |
| 10 |              |    |                                                                                                                                                                                                                |
| 11 |              |    |                                                                                                                                                                                                                |
| 12 |              |    |                                                                                                                                                                                                                |
| 13 |              |    |                                                                                                                                                                                                                |
| 14 |              |    |                                                                                                                                                                                                                |
| 15 |              |    |                                                                                                                                                                                                                |
| 16 |              |    |                                                                                                                                                                                                                |
| 17 |              |    |                                                                                                                                                                                                                |
| 18 |              |    |                                                                                                                                                                                                                |
| 19 |              |    |                                                                                                                                                                                                                |
| 20 |              |    |                                                                                                                                                                                                                |
| 21 |              |    |                                                                                                                                                                                                                |
| 22 |              |    |                                                                                                                                                                                                                |
| 23 |              |    |                                                                                                                                                                                                                |
| 24 |              |    |                                                                                                                                                                                                                |
| 25 |              |    |                                                                                                                                                                                                                |
| 26 |              |    |                                                                                                                                                                                                                |
| 27 |              |    |                                                                                                                                                                                                                |
| 28 |              |    |                                                                                                                                                                                                                |
| 29 |              |    |                                                                                                                                                                                                                |
| 30 |              |    |                                                                                                                                                                                                                |
| 31 |              |    |                                                                                                                                                                                                                |
| 32 |              |    |                                                                                                                                                                                                                |
| 33 |              |    |                                                                                                                                                                                                                |
| 34 |              |    |                                                                                                                                                                                                                |
| 35 |              |    |                                                                                                                                                                                                                |
| 36 |              |    |                                                                                                                                                                                                                |
| 37 |              |    |                                                                                                                                                                                                                |
| 38 |              |    |                                                                                                                                                                                                                |
| 39 |              |    |                                                                                                                                                                                                                |
| 40 |              |    |                                                                                                                                                                                                                |
| 41 |              |    |                                                                                                                                                                                                                |
| 42 |              |    |                                                                                                                                                                                                                |
| 43 |              |    |                                                                                                                                                                                                                |
| 44 |              |    |                                                                                                                                                                                                                |
| 45 |              |    |                                                                                                                                                                                                                |
| 46 |              |    |                                                                                                                                                                                                                |
| 47 |              |    |                                                                                                                                                                                                                |
| 48 |              |    |                                                                                                                                                                                                                |
| 49 |              |    |                                                                                                                                                                                                                |
| 50 |              |    |                                                                                                                                                                                                                |
| 51 |              |    |                                                                                                                                                                                                                |
| 52 |              |    |                                                                                                                                                                                                                |
| 53 |              |    |                                                                                                                                                                                                                |
| 54 |              |    |                                                                                                                                                                                                                |
| 55 |              |    |                                                                                                                                                                                                                |
| 56 |              |    |                                                                                                                                                                                                                |
| 57 |              |    |                                                                                                                                                                                                                |
| 58 |              |    |                                                                                                                                                                                                                |
| 59 |              |    |                                                                                                                                                                                                                |
| 60 |              |    |                                                                                                                                                                                                                |

\*Give information separately for exposed and unexposed groups.

# BMJ Open

## Dynamic accessibility by car to tertiary care emergency services in Cali, Colombia, in 2020: cross-sectional equity analyses using travel-time big data from a Google API

|                                 |                                                                                                                                                                                                                                                                                                                                                                                                                                                                                                                                                                                                                                                                                                                                                                                                                                                                                                                                                                                                                                                               |
|---------------------------------|---------------------------------------------------------------------------------------------------------------------------------------------------------------------------------------------------------------------------------------------------------------------------------------------------------------------------------------------------------------------------------------------------------------------------------------------------------------------------------------------------------------------------------------------------------------------------------------------------------------------------------------------------------------------------------------------------------------------------------------------------------------------------------------------------------------------------------------------------------------------------------------------------------------------------------------------------------------------------------------------------------------------------------------------------------------|
| Journal:                        | <i>BMJ Open</i>                                                                                                                                                                                                                                                                                                                                                                                                                                                                                                                                                                                                                                                                                                                                                                                                                                                                                                                                                                                                                                               |
| Manuscript ID                   | bmjopen-2022-062178.R2                                                                                                                                                                                                                                                                                                                                                                                                                                                                                                                                                                                                                                                                                                                                                                                                                                                                                                                                                                                                                                        |
| Article Type:                   | Original research                                                                                                                                                                                                                                                                                                                                                                                                                                                                                                                                                                                                                                                                                                                                                                                                                                                                                                                                                                                                                                             |
| Date Submitted by the Author:   | 25-Jul-2022                                                                                                                                                                                                                                                                                                                                                                                                                                                                                                                                                                                                                                                                                                                                                                                                                                                                                                                                                                                                                                                   |
| Complete List of Authors:       | <p>Cuervo, Luis Gabriel; Universitat Autònoma de Barcelona, Department of Paediatrics, Obstetrics &amp; Gynaecology and Preventative Medicine<br/> Martinez-Herrera, Eliana; Universidad de Antioquia, Facultad Nacional de Salud Pública<br/> Osorio, Lyda; Universidad del Valle Facultad de Salud, Escuela de Salud Pública<br/> Hatcher-Roberts, Janet; University of Ottawa Faculty of Medicine, School of Epidemiology and Public Health; Bruyere Research Institute<br/> Cuervo, Daniel; IQartil SAS<br/> Bula, Maria Olga; Egis Consulting<br/> Pinilla, Luis Fernando; Universidad de La Sabana, Correct email is LuisFerPinilla@gmail.com (system does not allow fixing it)<br/> Piquero, Felipe; Consumer advocate; Author of "Opportunities Amidst Uncertainty: My life with one kidney and without it", Published in English and Spanish<br/> Jaramillo, Ciro; Universidad del Valle, School of Civil and Geomatic Engineering<br/> Collaborative Group, AMORE Project; AMORE Project Collaborative Group; Universitat Autònoma de Barcelona</p> |
| <b>Primary Subject Heading</b>: | Health services research                                                                                                                                                                                                                                                                                                                                                                                                                                                                                                                                                                                                                                                                                                                                                                                                                                                                                                                                                                                                                                      |
| Secondary Subject Heading:      | Public health, Health services research, Health policy, Global health                                                                                                                                                                                                                                                                                                                                                                                                                                                                                                                                                                                                                                                                                                                                                                                                                                                                                                                                                                                         |
| Keywords:                       | Health policy < HEALTH SERVICES ADMINISTRATION & MANAGEMENT, ACCIDENT & EMERGENCY MEDICINE, Quality in health care < HEALTH SERVICES ADMINISTRATION & MANAGEMENT, Organisation of health services < HEALTH SERVICES ADMINISTRATION & MANAGEMENT, PUBLIC HEALTH, HEALTH SERVICES ADMINISTRATION & MANAGEMENT                                                                                                                                                                                                                                                                                                                                                                                                                                                                                                                                                                                                                                                                                                                                                   |
|                                 |                                                                                                                                                                                                                                                                                                                                                                                                                                                                                                                                                                                                                                                                                                                                                                                                                                                                                                                                                                                                                                                               |

SCHOLARONE™  
Manuscripts



I, the Submitting Author has the right to grant and does grant on behalf of all authors of the Work (as defined in the below author licence), an exclusive licence and/or a non-exclusive licence for contributions from authors who are: i) UK Crown employees; ii) where BMJ has agreed a CC-BY licence shall apply, and/or iii) in accordance with the terms applicable for US Federal Government officers or employees acting as part of their official duties; on a worldwide, perpetual, irrevocable, royalty-free basis to BMJ Publishing Group Ltd ("BMJ") its licensees and where the relevant Journal is co-owned by BMJ to the co-owners of the Journal, to publish the Work in this journal and any other BMJ products and to exploit all rights, as set out in our [licence](#).

The Submitting Author accepts and understands that any supply made under these terms is made by BMJ to the Submitting Author unless you are acting as an employee on behalf of your employer or a postgraduate student of an affiliated institution which is paying any applicable article publishing charge ("APC") for Open Access articles. Where the Submitting Author wishes to make the Work available on an Open Access basis (and intends to pay the relevant APC), the terms of reuse of such Open Access shall be governed by a Creative Commons licence – details of these licences and which [Creative Commons](#) licence will apply to this Work are set out in our licence referred to above.

Other than as permitted in any relevant BMJ Author's Self Archiving Policies, I confirm this Work has not been accepted for publication elsewhere, is not being considered for publication elsewhere and does not duplicate material already published. I confirm all authors consent to publication of this Work and authorise the granting of this licence.

## Dynamic accessibility by car to tertiary care emergency services in Cali, Colombia, in 2020: cross-sectional equity analyses using travel-time big data from a Google API

Luis Gabriel Cuervo,<sup>(1)</sup> Eliana Martinez Herrera,<sup>(2)</sup> Lyda Osorio,<sup>(3)</sup> Janet Hatcher Roberts,<sup>(4)</sup> Daniel Cuervo,<sup>(5)</sup> María Olga Bula,<sup>(6)</sup> Luis Fernando Pinilla,<sup>(7)</sup> Felipe Piquero,<sup>(8)</sup> Ciro Jaramillo,<sup>(9)</sup> on behalf of the AMORE Project Collaboration

(1) Luis Gabriel Cuervo, Universitat Autònoma de Barcelona, Spain

(2) National School of Public Health, Universidad de Antioquia, Medellín, Colombia

(3) Faculty, School of Public Health, Universidad del Valle, Colombia.

(4) Brùyere Research Institute and Adjunct School of Epidemiology and Public Health, University of Ottawa.

(5) Partner at IQuartil SAS. Industrial Engineer, MBA, Certified Data Analyst.

(6) MSc in urban planning, Egis Consulting.

(7) Universidad de la Sabana. Lecturer in the Operations Management Specialization.

(8) Attorney in administrative law and healthcare legislation. Consumer advocate and book author

(9) Associate Professor in the School of Civil and Geomatic Engineering, Universidad del Valle, Colombia; PhD thesis director, Universitat Autònoma de Barcelona.

Correspondence to: Luis Gabriel Cuervo, Universitat Autònoma de Barcelona, Spain

[LuisGabriel.Cuervo@autonoma.cat](mailto:LuisGabriel.Cuervo@autonoma.cat)

### Abstract

**Objectives:** To test a new approach to characterise accessibility to tertiary care emergency health services in urban Cali and assess the links between accessibility and sociodemographic factors relevant to health equity.

**Design:** The impact of traffic congestion on accessibility to tertiary care emergency departments was studied with an equity perspective, using a web-based digital platform that integrated publicly available digital data, including sociodemographic characteristics of the population and places of residence with travel times.

**Setting and participants:** Cali, Colombia (population 2.258 million in 2020) using geographic and sociodemographic data. The study used predicted travel times downloaded for a week in July 2020 and a week in November 2020.

**Primary and secondary outcomes:** The share of the population within a 15-minute journey by car from the place of residence to the tertiary care emergency department with the shortest journey (i.e., 15-minute accessibility rate; 15mAR) at peak-traffic congestion hours. Sociodemographic characteristics were disaggregated for equity analyses. A time-series bivariate analysis explored accessibility rates versus housing stratification.

**Results:** Traffic congestion sharply reduces accessibility to tertiary emergency care (e.g., 15mAR was 36.8% during peak-traffic hours vs 84.4% during free-flow hours for the week of July 6 – 12, 2020). Traffic congestion sharply reduces accessibility to tertiary emergency care. The greatest impact fell on specific ethnic groups, people with less educational attainment, and those living

1  
2  
3 in low-income households or on the periphery of Cali (15mAR: 8.1% peak traffic vs 51% free-  
4 flow traffic). These populations face longer average travel times to health services than the  
5 average population.  
6  
7

8 **Conclusions:** These findings suggest that health services and land use planning should prioritise  
9 travel times over travel distance and integrate them into urban planning. Existing technology  
10 and data can reveal inequities by integrating sociodemographic data with accurate travel times  
11 to health services estimates, providing the basis for valuable indicators.  
12  
13  
14  
15

## 16 Strengths and limitations of this study

- 17 - Our study investigated affordably measured dynamic accessibility to tertiary care  
18 emergency services for the entire population using massive amounts of measurements  
19 and provides an equity perspective.
- 20 - The platform was developed using a person-centred design; it communicates findings  
21 using basic descriptive statistics, graphics, and cartography.
- 22 - Travel times account for traffic congestion and are a proxy for travel costs (i.e., distance,  
23 cost, time).
- 24 - Sources used to measure travel times are empirically known to be accurate, but  
25 variations of their precision across sectors and populations, like the algorithms behind  
26 the measurements, are unknown.
- 27 - Models need to be retrained if conditions change ostensibly.  
28  
29  
30  
31  
32  
33

## 34 Introduction

### 35 Background and rationale

36 Every minute counts in life-threatening emergencies that do not leave time for referrals (e.g.,  
37 insufficient tissue oxygenation, critical bleeding, significant tissue damage, poisoning). The well-  
38 being of patients depends on getting immediate attention in a tertiary care facility that offers  
39 essential subspecialised care by highly skilled personnel and sophisticated facilities, including  
40 specialised surgical theatres and intensive care units.  
41  
42  
43  
44

45 This study tests a new approach that allows stakeholders to explore different assumptions and  
46 scenarios. For example, different time-to-destination thresholds, traffic congestion levels, or  
47 accessibility for the whole or parts of the population.  
48  
49

50 The study delivers baselines for accessibility by car (automobile) to tertiary care emergency  
51 departments in Cali, Colombia. It assesses the impact of traffic congestion on accessibility and  
52 health equity, using a car (private or for-hire) as the means of transportation because it is how  
53 Cali residents typically reach tertiary care facilities in emergencies. This approach also makes it  
54 possible for future studies to analyse accessibility with other means of transportation or under  
55 different assumptions.  
56  
57  
58  
59  
60



1  
2  
3  
4  
5  
6  
7  
8  
9  
10  
11  
12  
13  
14  
15  
16  
17  
18  
19  
20  
21  
22  
23  
24  
25  
26  
27  
28  
29  
30  
31  
32  
33  
34  
35  
36  
37  
38  
39  
40  
41  
42  
43  
44  
45  
46  
47  
48  
49  
50  
51  
52  
53  
54  
55  
56  
57  
58  
59  
60

Accessibility is a dynamic spatial attribute measured as the travel time needed to reach a health service location (destination) from the origin of the demand (place of residence in this study).[1–8] Travel times fluctuate over time and with traffic congestion. Accessibility has been challenging to study and monitor, and poor accessibility can be detrimental to health equity.[4,8–10]

Traditional assessments of accessibility in urban planning seldom consider its dynamic nature; origin-destination studies and surveys usually lack a dynamic assessment showing the effects of infrastructure, population changes, or traffic on accessibility and health equity.[11,12]

Traditional assessments are onerous, done every five to ten years, using lengthy surveys that lack the specificity of health services and the geographical granularity of Traffic Analysis Zones, or TAZs (instead of more expansive neighbourhoods or communes). The conditions assessed may have changed when results become public, rendering any proposed solutions irrelevant.[8,13] This study explores an approach that addresses critical limitations of traditional accessibility assessments to expose the links between equity and accessibility to tertiary care emergency services.[10]

Innovative approaches using accessible web-based platforms are an opportunity for evidence-informed decision-making and planning to improve health coverage. These platforms allow stakeholders to test assumptions and reach conclusions and capitalise on features such as big data from smartphones that can provide accurate travel-time estimates. Therefore, dynamic, affordable, and updatable assessments that account for traffic congestion could be used, thus focusing on travel times instead of travel distances.[5,8,12,14–17] They might allow stakeholders to explore data, test assumptions better, and reach action-oriented conclusions.[18] This study integrates the equity-relevant data we used to perform equity analyses.

## Objectives

This study aims to characterise accessibility to tertiary care emergency health services in urban Cali and the links between accessibility and sociodemographic factors relevant to health equity.

## Methods

### Study population and setting

This study is about emergencies requiring attention in tertiary care institutions. By early July 2020, COVID-19 pandemic-related quarantine and stay-at-home orders had been lifted, and traffic projections showed substantial congestion. By November 2020, some measures had been reinstated, car travel was restricted by license number, and traffic projections showed reduced travel times, especially in central city areas.[19–21]

1  
2  
3 This cross-sectional study was conducted with data downloads for the urban area of Cali, the  
4 third-largest city in Colombia and the largest urban centre in the southwest and Pacific regions,  
5 with an estimated 2.258 million residents in 2020. About half of the population lives in low-  
6 income housing, 42% in middle-income housing, and 8% in high-income housing. Housing  
7 stratification does not necessarily represent the income of individuals.[22,23]  
8  
9

10 About 84% of the population identifies as white, 14% as Afro-Colombian and a small proportion  
11 as indigenous or nomadic people like the Rrom. In December 2020, unemployment rates in Cali  
12 were 26.7% for women and 18.5% for men, a one-year increase of 12.5% and 8.8%,  
13 respectively.  
14  
15

16 The situation was worse among young people, and an estimated 52% of women and 47.2% of  
17 men relied on the informal economy. The COVID-19 pandemic punished the local economy.  
18 While 1 in 5 people was unemployed, the rates were higher among people in low-income  
19 households. From 2016 to 2020, Cali also absorbed 139,000 migrants from Venezuela; 25,000 in  
20 2020.[24]  
21  
22

23 Poverty, inequity, and discrimination drove social unrest that led to violence after a 2021  
24 national strike.[25,26]  
25  
26

27 The city government is dividing its 22 communes into six to eight districts, which might lead to  
28 negotiations over resources and issues such as access to essential services.[27,28]  
29  
30

### 31 Targeted sites and participants

32 The study targeted the 14 tertiary care institutions with emergency departments registered in  
33 the Ministry of Health Special Registry of Health Services Providers (REPS in Spanish). The  
34 registry listed the same institutions in July 2020 and January 2021; all provided surgery and  
35 intensive care services. Those institutions are listed in Supplemental File 1.[29]  
36  
37  
38  
39  
40

### 41 Study design

42 This study includes two cross-sectional analyses integrating publicly available data using digital  
43 technologies and analytics. The study generated new knowledge of potential value when  
44 implementing evidence-informed approaches to improve accessibility and health equity. The  
45 study used updatable data to measure travel times and evaluate the effects of interventions  
46 and changes to infrastructure, service provision, traffic congestion, and population. The  
47 following study methods seek to address current challenges for assessments of accessibility to  
48 health services:[10]  
49  
50  
51

- 52 • Dynamic assessments of travel times to account for traffic variations.  
53  
54  
55  
56  
57  
58  
59  
60

- Inputs from diverse stakeholders to create an interactive platform that displays intersectoral data on dashboards so stakeholders can interpret data quickly and accurately.
- Disaggregated data to enable straightforward equity analysis of accessibility.
- Situational analysis of the accessibility to specific services for urban areas.
- An approach suitable for monitoring health equity related to accessibility.

The data for the cross-sectional analyses were obtained from the internet-based AMORE Platform (<https://www.iquartil.net/proyectoAMORE>), hosted by iQuartil SAS, an analytics company, and developed under the leadership of the Principal Investigator (LGC).

The AMORE Platform integrates data from:

- [2018 National Census Data](#) for Cali, obtained from the official public databases of the Colombian National Department of Statistics (DANE in Spanish).[22,23]
- The administrative divisions of Cali were obtained from the Colombian [IDESC Geoportal](#); [Traffic Analysis Zones \(TAZ\)](#) were matched to the [census blocks](#).[13,30] The origin for each journey is the population-weighted centroid for the TAZ of the place of residence. Similarly, the destination is the centroid for the TAZ hosting the tertiary care emergency department with the shortest travel time.
- [Google Distance Matrix API](#). For this baseline assessment of the Cali urban area, predicted travel times were downloaded on 3 July 2020 for the week of 6 – 12 July 2020, and on 27 October 2020, for the week of 23 – 29 November 2020. Travel times varied substantially during the COVID-19 pandemic and while it is unclear how this influenced Google Distance Matrix algorithms,[31] empirical and anecdotal reports suggest they remained accurate.
- The 14 tertiary care institutions with an emergency department in Cali were identified using [REPS](#).[29]

Databases were integrated and tested between August 2020 and October 2021 using: KNIME® open-source data analytics reporting and integration platform, Python™ programming language software (back end), and an interface (front end) developed with interactive data visualisation software Microsoft PowerBi™.

## Patient and public involvement

The AMORE Project Collaborative Group is diverse, with over two-dozen contributors representing different stakeholders and sectors. Group members participated throughout the design, conduct, and reporting of this study and the dissemination of results. The contributors and some public servants participated in the co-creation of knowledge and are listed in the [Acknowledgments](#). These collaborators offer different governance perspectives: authorities, service providers, service users, and organised civil society, including academics, advocates, and experts from various fields of knowledge.[32,33]

## Data integration and output

The [AMORE Platform](#) dashboards and visualisations provide descriptive indicators using simple maps, dials, bars, and data. These indicators show travel times using the shortest journeys and descriptive statistics for each urban TAZ at a given traffic congestion level. The displays for July and November can be accessed on this [project website](#). The [AMORE Platform](#) allows users to perform equity analyses by disaggregating sociodemographic characteristics.[34] The top section of the Platform (**Figure 1**) has nine traffic-congestion clusters and their representation in the week. A dial shows the share of the population within the set travel-time threshold.

The middle section displays a population pyramid and maps the 14 tertiary care emergency departments, travel times, and population density (**Figure 1**). Each section of the pyramid or map can be toggled to filter populations. The choropleth maps can be expanded and rotated for a 3D display, with TAZ height representing population density (**Supplemental File 2**). Selecting a TAZ displays its ID, population, and travel time.

Choropleth maps consist of TAZs established by MetroCali (Integrated Mass Transit System) in 2015 for the urban area and linked to the geotagged census block information, matching the population with these TAZs.[13] The geometric matching of blocks and TAZs yielded 507 inhabited TAZs within the urban perimeter. The origin-destination times were estimated from the population-adjusted geographic centroid of each TAZ to the respective centroid where each institution was located.

The Colombian census was completed through interviews with an adult for each household. Data was stored, linking it to a city block code to anonymise it. The AMORE Platform used the census microdata categorisations and, for a few variables, aggregate groups for simplification (e.g., education was simplified with guidance from an expert in the Colombian education system, Psychologist Myriam Lorena Rosero Hernández, ME).

In 2019, DANE recommended adjusting the 2018 population of Cali upward by 18% from the original census data due to under-registration.[23,35] DANE advised making further adjustments due to intercensal growth, migration and updates.[24,36] These adjustments amounted to 28.1%, and DANE did not disaggregate the adjustment data. Therefore, 495,219 records were randomly selected and duplicated, reaching a population of 2,258,823 inhabitants, keeping the distributions. These are displayed in the AMORE Platform by toggling the census adjustment (**Figure 1**, “Data type”).

The right section of the platform displays sociodemographic characteristics (**Figure 1**).

The AMORE Platform displays the absolute and relative figures for the georeferenced data of inhabitants, both for the city or selected TAZs within a travel schedule **Error! Reference source not found.** The variables integrated into the platform are listed in Table 1.

## Data sources and measurements

*Table 1. Census data included in the AMORE Platform dashboards and maps*

| Geotagged variables                                     | Platform display                                      |
|---------------------------------------------------------|-------------------------------------------------------|
| Age in completed years grouped by quinquennium (census) | Population density per TAZ                            |
| Ethnicity, self-described                               | Health service: tertiary care emergency departments   |
| Health status (Sick / Healthy)                          | Absolute and relative figures of modified aggregation |
| Highest education level attained                        | Travel-time thresholds (slider + choropleth heatmap)  |
| Literacy                                                | Travel times and population per TAZ                   |
| Marital status                                          | Overall accessibility for filtered population         |
| Population pyramid by gender and age                    |                                                       |
| Report of disability / physical condition               |                                                       |
| School attendance                                       |                                                       |
| Household inhabitants                                   |                                                       |
| Housing inhabitants                                     |                                                       |
| Housing socio-economic stratum                          |                                                       |
| Housing type                                            |                                                       |

We used the controls listed in Table 2 to conduct univariate and bivariate analyses.

*Table 2. AMORE Platform displays resulting from integrating travel times, services, origin TAZ, and census data*

| Variables that change according to traffic, travel-time threshold, and other filters                         |
|--------------------------------------------------------------------------------------------------------------|
| Travel-time threshold filter for the analysis.                                                               |
| Drop-down list with institutions that can be toggled for inactivation.                                       |
| Drop-down list to select people registered by the census, the 28.1% adjustment, or the adjusted census data. |
| Traffic levels identified with a K-means clustering algorithm.                                               |
| Absolute and relative figures provided for each variable.                                                    |
| Maps are organized by TAZs.                                                                                  |
| Intensive care beds data for selected institutions taken from REPS.                                          |
| <b>People with accessibility for a selected time threshold and traffic level.</b>                            |
| <b>Blocks with accessibility for a selected time threshold.</b>                                              |
| <b>TAZs within the time threshold by level of traffic.</b>                                                   |
| Household inhabitants                                                                                        |
| Housing inhabitants                                                                                          |
| Housing by power bill economic stratum                                                                       |

## Bias

Each source is susceptible to biases and imprecision, but these are unlikely to be of a magnitude that would change conclusions. Some of the data sources and the timing of their updates can introduce bias. For example, the census is updated every five years. Since the last census in 2018, there has been a significant flow of migrants to Cali and job losses rose during the COVID-19 pandemic.[24,37] These developments likely make our results appear more

1  
2  
3 favourable than they are. The census had under-registration from failed or incomplete visits,  
4 underreporting of people living in households, or people absent in each of the three times  
5 registrars visited. The estimates for migrants and intercensal growth are broad and likely  
6 unevenly distributed among the population and no precise measurement errors are  
7 available.[23,24]  
8  
9

10 Traffic patterns may have changed with the imposition and lifting of pandemic-related  
11 restrictions, thus altering traffic predictions. Stay-at-home orders and traffic restrictions may  
12 have changed traffic congestion, causing unusual and uneven patterns of accessibility. Google  
13 Distance Matrix API may have more accurate travel times for areas where more people travel  
14 with mobile phones and in cars.  
15  
16

17  
18 Income categorisation is determined by the individual household electricity bill, which is graded  
19 from 1 to 6, with 6 representing the highest-income households. Some homes may have been  
20 misclassified (e.g., due to error or corruption) and that low-income people are living in higher-  
21 income households. This is possible for relatives and domestic workers residing in high-income  
22 housing and earning minimum wages or having no income. This kind of misclassification would  
23 introduce some bias that would overrepresent high-income populations.  
24  
25

26 The Colombian census recognises ethnicity, but some people likely found it difficult to choose  
27 their ethnicity. The census lacks an option for residents of white or mestizo descent, two large  
28 groups not explicitly listed on the census. Similarly, people with multi-ethnic parents may find it  
29 challenging to choose one ethnic category.  
30  
31

32 Traffic restrictions linked to car license numbers affect households and neighbourhoods  
33 differently; more affluent families are more likely to own more cars and be less affected by  
34 these measures.[38]  
35  
36

37 To reduce data downloads, we performed a cluster analysis (using a K-means method) of the  
38 travel times on a sample of the total weekly hours. This allowed us to identify the hours of the  
39 week with similar traffic congestion levels by measuring the incremental changes against the  
40 minimum travel time. We determined that nine clusters allowed us to discriminate traffic  
41 congestion based on sensitivity analysis to represent the 168 hours of the week.  
42  
43

44 For each day and hour time band, we estimated the percentage difference between the  
45 minimum time of that trip and the travel for the time band. We calculated the average of this  
46 metric for all the journeys of the sample to obtain clusters. For example, the traffic from 6 to 7  
47 p.m. on weekdays and from noon to 2 p.m. on Saturdays behaves similarly for this cluster,  
48 representing the highest traffic congestion. Creating these clusters again reduces information  
49 requirements and costs.  
50  
51

52  
53 Using hourly assessments is arbitrary; travel times could be measured every minute or second.  
54 However, more frequent checks would increase costs (i.e., from data downloads, computing  
55 time, people time) by orders of magnitude without substantive changes in the conclusions.  
56  
57  
58  
59



1  
2  
3 More frequent checks would thus be impractical and of little value. Details of the effects of  
4 these optimisations will be the subject of a future manuscript.  
5  
6

7 Using congestion clusters and TAZs for the 14 institutions made it possible to obtain the city  
8 estimates with a sample of 1,159,536 measurements downloaded from Google Distance Matrix  
9 API. The geometric matching of blocks and TAZs yielded 507 inhabited TAZs in the urban  
10 perimeter.  
11

12  
13 Populations are not evenly distributed across TAZs. We therefore adjusted TAZ geographic  
14 centroids by weighing population distribution. Because centroids had irregular shapes,  
15 population-weighted centroids could end outside the boundaries of a TAZ. This required  
16 relocating the adjusted centroid to the nearest border, potentially generating some seconds of  
17 imprecision in estimates. Similarly, using the TAZ of a hospital instead of the location of the  
18 emergency department entrance also generates imprecisions.  
19  
20

21 Traffic patterns are not homogeneous within the city or its TAZs; traffic flow patterns vary in  
22 time and direction. We therefore sorted traffic times so that cluster nine always represented  
23 the maximum traffic congestion, cluster one the minimum traffic congestion, and intermediate  
24 clusters were sorted accordingly. **Error! Reference source not found.** illustrates the clusters and  
25 variations.  
26  
27

28  
29 The definition of an acceptable travel-time threshold to reach a tertiary care emergency  
30 department is arbitrary, and we found no international standard. For this analysis, we chose a  
31 threshold of fifteen minutes at peak-traffic congestion times that was the most frequently  
32 considered by interviewed local public servants and members of the AMORE Project  
33 Collaborative; it is within the thresholds found in the literature.[39–41]  
34  
35

36 Notably, the distribution of traffic levels is skewed towards heavy congestion from Monday to  
37 Saturday between 6:00 and 22:00, with the mode being cluster 8 (40/168 hours, or 24% of the  
38 week); Cali is a congested city.  
39  
40

## 41 Results

### 42 Participants

43  
44 The study included the adjusted population of 2,258,823 people, representing 596,051  
45 households living in 582,814 housing units. The size and representation of populations are  
46 disaggregated in Table 3.  
47  
48

49  
50  
51 Most of the population is mestizo or white (83.7 %) or Afro-descendants (14.5%). Islanders and  
52 Rrom people represent less than 1% of the population. Absolute and relative figures  
53 disaggregated by sociodemographic characteristics are presented in Table 3.  
54  
55  
56  
57  
58  
59



## Descriptive data

The analysis found that most of the low-income population could not reach the nearest tertiary care emergency department within 15 minutes during peak-traffic times, whether in November 2020 (81.4%) or July 2020 (96.3%; **Supplemental File 2** and **Supplemental File 3**, respectively).

The analysis also shows that accessibility is a substantial barrier to low-income households with high population density and those living in peripheral TAZs, amplifying inequities.

## Main results

The effects of traffic disaggregated by household income level, ethnicity, gender and age, education level, and civil status are presented in **Error! Reference source not found.**, **Error! Reference source not found.**, and Table 3. **Error! Reference source not found.** shows differential accessibilities by housing stratum during peak and free-flow traffic hours, with the differential being more detrimental to the poorest and more affected by peak-traffic congestion.

### Traffic variations and their effect (July vs November 2020)

#### 6 – 12 July vs 23 – 29 November 2020

The July travel-time predictions pointed to 831,982 people (36.8%) living within 15 minutes of travel time from tertiary care emergency services, but this increased to 1.28 million (56.7%) in November. The distribution of accessibility when disaggregating data by income level indicated lower accessibility for the poor and those living in peripheral TAZs (**Error! Reference source not found.**, **Error! Reference source not found.**, and evident in **Supplemental File 2** and **Supplemental File 3** to those familiar with the demographic distribution of Cali). These populations also have a higher representation of minority ethnic groups and people with lower educational attainment.

Table 3 shows the data obtained from the AMORE Platform for the July 2020 and November 2020 assessments, which lets users explore equity considerations.

## Other analyses

**Error! Reference source not found.** shows that people living in low-income households face longer travel times and are more severely impacted by traffic congestion; they thus invest more resources in accessing services.

Myriads of analyses can be done by modifying traffic congestion clusters, travel-time thresholds, or toggling population groups or institutions. For pragmatic reasons, this article focused on sticking to the 15-minute threshold and exploring accessibility at peak hours in more detail, which is a good scenario when planning for emergencies.

1  
2  
3  
4  
5 Palenque, Islanders, Rrom, and indigenous people represent 0.5% of the population of Cali.  
6 Minority ethnic groups benefitted the most from the reduction in traffic congestion. The  
7 noticeable improvement among the Palenque resulted from most living in the south-eastern  
8 neighbourhoods of El Morichal, El Retiro, El Vallado, and Ciudad Córdoba, which fell within the  
9 15-minute threshold when traffic eased in November (see **Error! Reference source not found.**).  
10  
11  
12  
13  
14  
15  
16  
17  
18  
19  
20  
21  
22  
23  
24  
25  
26  
27  
28  
29  
30  
31  
32  
33  
34  
35  
36  
37  
38  
39  
40  
41  
42  
43  
44  
45  
46  
47  
48  
49  
50  
51  
52  
53  
54  
55  
56  
57  
58  
59  
60

**Table 3. Accessibility by auto within fifteen minutes to tertiary care in July and November, Cali 2020**

| 15 min accessibility to the nearest tertiary care emergency service | Jul 2020 (%) | Nov 2020 (%) | Change       | Jul 2020 (#)   | Nov 2020 (#)     | Change (#)     | Total Population | %     | Accessibility July | Accessibility November | Subgroup change |
|---------------------------------------------------------------------|--------------|--------------|--------------|----------------|------------------|----------------|------------------|-------|--------------------|------------------------|-----------------|
|                                                                     | <b>36.8%</b> | <b>56.7%</b> | <b>19.8%</b> | <b>831,982</b> | <b>1,280,320</b> | <b>448,338</b> | <b>2,258,823</b> |       | <b>36.8%</b>       | <b>56.7%</b>           |                 |
| <b>Socio-economic stratum</b>                                       |              |              |              |                |                  |                |                  |       |                    |                        |                 |
| Low                                                                 | 7.7%         | 18.6%        | 10.8%        | 174,869        | 419,448          | 244,579        | 1,109,549        | 49.1% | 15.8%              | 37.8%                  | 22.0%           |
| Middle                                                              | 22.0%        | 30.0%        | 8.0%         | 496,558        | 677,967          | 181,409        | 935,699          | 41.4% | 53.1%              | 72.5%                  | 19.4%           |
| High                                                                | 7.0%         | 7.9%         | 0.9%         | 157,682        | 178,277          | 20,595         | 204,589          | 9.1%  | 77.1%              | 87.1%                  | 10.1%           |
| N.D.                                                                | 0.1%         | 0.2%         | 0.1%         | 2,873          | 4,628            | 1,755          | 8,986            | 0.4%  | 32.0%              | 51.5%                  | 19.5%           |
| <b>Ethnicity</b>                                                    |              |              |              |                |                  |                |                  |       |                    |                        |                 |
| Afro descendent                                                     | 3.1%         | 5.6%         | 2.5%         | 70,394         | 126,298          | 55,904         | 325,865          | 14.4% | 21.6%              | 38.8%                  | 17.2%           |
| Rrom (nomadic)                                                      | 0.0%         | 0.0%         | 0.0%         | 37             | 53               | 16             | 102              | 0.0%  | 36.3%              | 52.0%                  | 15.7%           |
| Indigenous                                                          | 0.2%         | 0.3%         | 0.2%         | 3,571          | 7,103            | 3,532          | 11,112           | 0.5%  | 32.1%              | 63.9%                  | 31.8%           |
| Islander/Raizal                                                     | 0.0%         | 0.0%         | 0.0%         | 182            | 251              | 69             | 382              | 0.0%  | 47.6%              | 65.7%                  | 18.1%           |
| Other (Caucasian, Mestizo)                                          | 32.9%        | 49.9%        | 17.0%        | 743,469        | 1,126,671        | 383,202        | 1,890,491        | 83.7% | 39.3%              | 59.6%                  | 20.3%           |
| Palenque                                                            | 0.0%         | 0.0%         | 0.0%         | 29             | 176              | 147            | 245              | 0.0%  | 11.8%              | 71.8%                  | 60.0%           |
| N.D.                                                                | 0.6%         | 0.9%         | 0.2%         | 14,300         | 19,768           | 5,468          | 30,626           | 1.4%  | 46.7%              | 64.5%                  | 17.9%           |
| <b>Educational level</b>                                            |              |              |              |                |                  |                |                  |       |                    |                        |                 |
| Graduate degree                                                     | 2.1%         | 2.7%         | 0.5%         | 47,785         | 60,019           | 12,234         | 72,441           | 3.2%  | 66.0%              | 82.9%                  | 16.9%           |
| Bachelor's degree                                                   | 7.4%         | 9.9%         | 2.5%         | 166,816        | 223,602          | 56,786         | 295,319          | 13.1% | 56.5%              | 75.7%                  | 19.2%           |
| Technical                                                           | 4.3%         | 6.5%         | 2.2%         | 97,733         | 147,634          | 49,901         | 244,160          | 10.8% | 40.0%              | 60.5%                  | 20.4%           |
| Middle                                                              | 8.7%         | 14.0%        | 5.3%         | 196,674        | 316,810          | 120,136        | 608,429          | 26.9% | 32.3%              | 52.1%                  | 19.7%           |
| High School                                                         | 4.7%         | 7.6%         | 2.9%         | 105,509        | 171,843          | 66,334         | 337,065          | 14.9% | 31.3%              | 51.0%                  | 19.7%           |
| Primary                                                             | 6.3%         | 10.5%        | 4.3%         | 141,309        | 237,344          | 96,035         | 468,206          | 20.7% | 30.2%              | 50.7%                  | 20.5%           |
| Pre-school                                                          | 0.5%         | 0.8%         | 0.3%         | 11,158         | 18,636           | 7,478          | 36,294           | 1.6%  | 30.7%              | 51.3%                  | 20.6%           |
| No data                                                             | 2.9%         | 4.6%         | 1.7%         | 64,998         | 104,432          | 39,434         | 196,909          | 8.7%  | 33.0%              | 53.0%                  | 20.0%           |
| <b>Literacy</b>                                                     |              |              |              |                |                  |                |                  |       |                    |                        |                 |
| Literate                                                            | 33.8%        | 51.7%        | 17.9%        | 764,426        | 1,168,883        | 404,457        | 2,043,041        | 90.4% | 37.4%              | 57.2%                  | 19.8%           |
| No literacy                                                         | 0.8%         | 1.4%         | 0.6%         | 17,927         | 32,006           | 14,079         | 66,383           | 2.9%  | 27.0%              | 48.2%                  | 21.2%           |
| N.A.                                                                | 1.6%         | 2.7%         | 1.1%         | 36,401         | 61,180           | 24,779         | 121,140          | 5.4%  | 30.0%              | 50.5%                  | 20.5%           |
| N.D.                                                                | 0.6%         | 0.8%         | 0.2%         | 13,228         | 18,251           | 5,023          | 28,259           | 1.3%  | 46.8%              | 64.6%                  | 17.8%           |
| <b>Gender/Sex</b>                                                   |              |              |              |                |                  |                |                  |       |                    |                        |                 |
| Female                                                              | 19.9%        | 30.5%        | 10.6%        | 449,188        | 688,160          | 238,972        | 1,208,617        | 53.5% | 37.2%              | 56.9%                  | 19.8%           |
| Male                                                                | 16.9%        | 26.2%        | 9.3%         | 382,794        | 592,160          | 209,366        | 1,050,206        | 46.5% | 36.4%              | 56.4%                  | 19.9%           |
| <b>Civil status</b>                                                 |              |              |              |                |                  |                |                  |       |                    |                        |                 |
| Single                                                              | 13.4%        | 20.7%        | 7.3%         | 303,645        | 468,447          | 164,802        | 821,536          | 36.4% | 37.0%              | 57.0%                  | 20.1%           |
| Married or cohabitation                                             | 14.6%        | 22.6%        | 7.9%         | 330,460        | 509,814          | 179,354        | 896,958          | 39.7% | 36.8%              | 56.8%                  | 20.0%           |
| Divorced or separated                                               | 2.9%         | 4.2%         | 1.3%         | 65,978         | 95,928           | 29,950         | 163,980          | 7.3%  | 40.2%              | 58.5%                  | 18.3%           |
| Widow                                                               | 1.9%         | 2.6%         | 0.8%         | 42,743         | 59,804           | 17,061         | 95,611           | 4.2%  | 44.7%              | 62.5%                  | 17.8%           |
| N.A.                                                                | 3.4%         | 5.7%         | 2.3%         | 76,821         | 129,370          | 52,549         | 254,492          | 11.3% | 30.2%              | 50.8%                  | 20.6%           |
| N.D.                                                                | 0.5%         | 0.8%         | 0.2%         | 12,335         | 16,957           | 4,622          | 26,246           | 1.2%  | 47.0%              | 64.6%                  | 17.6%           |
| <b>Age</b>                                                          |              |              |              |                |                  |                |                  |       |                    |                        |                 |
| 0-4                                                                 | 1.6%         | 50.5%        | 48.9%        | 36,401         | 61,180           | 24,779         | 121,140          | 5.4%  | 30.0%              | 50.5%                  | 20.5%           |
| 0-14                                                                | 5.4%         | 50.9%        | 45.6%        | 121,111        | 204,055          | 82,944         | 400,527          | 17.7% | 30.2%              | 50.9%                  | 20.7%           |
| 5-14                                                                | 3.8%         | 51.1%        | 47.4%        | 84,710         | 142,875          | 58,165         | 279,387          | 12.4% | 30.3%              | 51.1%                  | 20.8%           |
| 15-24                                                               | 5.3%         | 53.9%        | 48.6%        | 120,001        | 195,693          | 75,692         | 363,311          | 16.1% | 33.0%              | 53.9%                  | 20.8%           |
| 15-59                                                               | 23.8%        | 56.4%        | 32.7%        | 536,754        | 836,078          | 299,324        | 1,482,069        | 65.6% | 36.2%              | 56.4%                  | 20.2%           |
| 15-64                                                               | 25.9%        | 56.7%        | 30.8%        | 585,558        | 904,942          | 319,384        | 1,595,016        | 70.6% | 36.7%              | 56.7%                  | 20.0%           |
| 60+                                                                 | 7.7%         | 63.8%        | 56.1%        | 174,117        | 240,187          | 66,070         | 376,227          | 16.7% | 46.3%              | 63.8%                  | 17.6%           |
| 65+                                                                 | 5.5%         | 65.1%        | 59.5%        | 125,313        | 171,323          | 46,010         | 263,280          | 11.7% | 47.6%              | 65.1%                  | 17.5%           |
| 80+                                                                 | 1.5%         | 69.0%        | 67.6%        | 33,380         | 44,248           | 10,868         | 64,100           | 2.8%  | 52.1%              | 69.0%                  | 17.0%           |
|                                                                     | <b>36.8%</b> | <b>56.7%</b> | <b>19.8%</b> | <b>831,982</b> | <b>1,280,320</b> | <b>448,338</b> | <b>2,258,823</b> |       |                    |                        |                 |

## Discussion

### Main findings

The analysis shows substantial variations in access to tertiary care emergency services due to traffic congestion and the links between geographical accessibility and other social determinants of health. The two points of estimate were for early July and late November 2020, and their substantial variations stress the importance of having updatable sources.

The unusually light traffic congestion of November 2020 might have been due to the mobility restrictions associated with the COVID-19 pandemic. Lighter traffic congestion improved accessibility for an additional 448,338 people, most living in low-income households. These people were also within the 15-minute threshold (**Error! Reference source not found.**), and their location can be visualised by comparing **Supplemental File 2** and **Supplemental File 3**. Table 3 shows accessibility at peak-traffic hours disaggregated by sociodemographic characteristics relevant to equity.[42–44]

The longest journeys were 46 minutes in July and November. These journeys started from densely populated, impoverished eastern neighbourhoods along the Cauca River (Aguablanca district) and sparsely populated wealthy villas in the southern edge of the city, bordering Jamundí.

Easing traffic congestion brought an additional 22% (244,579) of people in the low-income household and 19.4% (181,409) more people living in middle-income households within the 15-minute threshold.

Improvements were not notably disparate among the different groups (sex, educational attainment and literacy, age, and civil status). In terms of education, people with higher educational attainment (a bachelor's degree or higher) were less impacted by traffic changes (69,020 people) and those with lower educational attainment were more highly impacted (e.g., 282,505 people with primary, middle, high, or technical school education). The variations seemed unimpressive in relative terms but are notable in absolute numbers, considering that an additional 332,406 people with primary, middle, high, or technical school education were included as congestion eased. Variations in congestion resulted in substantial accessibility improvement, with nearly half a million more people within a 15-minute accessibility threshold, almost 20% of the population.

Comparing age groups, children and the young and working-age populations gained more accessibility with the changes in traffic, as the elderly tend to live closer to health services.

Variations in traffic congestion can lead to notable accessibility measurement changes among populations that concentrate around the borders of assessed travel time thresholds, as seen among the Palenque people.

1  
2  
3  
4 **Supplemental File 2** and **Supplemental File 3** show that tertiary care health services are far  
5 from where most of the population lives. Geospatial analysis, big data, and predictive and  
6 prescriptive analytics could inform service planning in ways that maximise accessibility if new  
7 services address these limitations.  
8  
9

## 11 Limitations

12 The AMORE Platform used data modelling and clustering to estimate travel times between the  
13 origin and destination TAZ, lowering the cost of using big data and still delivering accessibility.  
14 Operational costs are thus low, and platform updates for monitoring and evaluation are  
15 affordable. The trade-off for affordability is imprecisions in estimates. These imprecisions are  
16 more likely to affect populations living near the 15-minute threshold and those further away  
17 from TAZ centroids with heavy traffic congestion. However, these imprecisions are unlikely to  
18 change the overall urban assessment.  
19  
20  
21  
22

23 Predicted travel times from the Google Distance Matrix API are accurate and are fed by big data  
24 from smartphones. Other databases, such as [Waze Transport SDK API](#), can be used to generate  
25 estimates, but these providers do not release prediction algorithms. It is thus impossible to  
26 know the magnitude and variations introduced by unforeseen events, like pandemic-related  
27 restrictions, and to estimate the impact of resulting errors or biases on estimates.  
28  
29

30 Colombian law requires hospitals to treat patients in emergencies. Modelling for this study  
31 assumed that people would resort to the hospital with the shortest travel time. But people may  
32 go to a different hospital if they know it better, their insurer recommends it or it has a good  
33 reputation. Our estimates are thus likely optimistic.  
34  
35

36 While choropleth maps allow users to explore the travel times from a specific TAZ, panels do  
37 not reflect that a origin of a journey will not always be the place of residence. This limitation  
38 will spread differently at different times and for diverse populations.  
39  
40

41 The relevance of our findings could change if the registered tertiary care facilities changed in  
42 REPS (i.e., a new institution opens, or an existing institution is reclassified as tertiary, changing  
43 the results). The interactive platform allows for prompt updates and reanalysis in response to  
44 these contingencies.  
45  
46  
47  
48

## 49 Interpretation

50 The AMORE Platform reveals accessibility and its health equity implications, providing new  
51 dynamic data that accounts for the effects of traffic. It does so more precisely and at a fraction  
52 of the costs of household surveys and origin-destination studies, providing a new tool to inform  
53 service plans, programs, and policies.  
54  
55  
56  
57  
58  
59

1  
2  
3 Integrating publicly available data from public sources might be a breakthrough that improves  
4 evidence-informed decisions regarding the location and provision of health services.  
5 Visualisations might help stakeholders interpret the data and agree on a common objective and  
6 metric: painting the city green by covering its entire population and offering equitable  
7 accessibility to all people.  
8  
9

10 Updating the AMORE Platform is cheaper and faster than updating other origin-destination  
11 studies; its assessments are granular and sensitive to variations and can be used to monitor and  
12 evaluate changes. In emergencies such as earthquakes, a modified platform could provide a  
13 prompt situation analysis by feeding real-time data downloads rather than predictions.  
14  
15

16 These findings suggest that with congested traffic in peak hours, most Cali residents (63%) are  
17 beyond the 15-minute travel-time threshold by car to the nearest tertiary care emergency  
18 department. However, this figure fell to 43% when traffic congestion eased.  
19  
20

21 Reduced accessibility is unevenly distributed and reflects the inverse care law: people who live  
22 in low-income households or have less education face longer journeys to tertiary care  
23 emergency departments. Incidentally, heavy traffic also affects people on the periphery of Cali,  
24 including some high-income households, as congestion clogs roads they use to reach tertiary  
25 emergency care facilities.  
26  
27

28 Accessibility is one of many potential access barriers to health services and a critical one. Other  
29 factors that affect access to health care (e.g., rights, quality, or supplies) are meaningless if  
30 patients cannot reach tertiary emergency care in a crisis. Additional barriers to accessing health  
31 services (such as non-compliance with Colombian law, quality, and institutional and reputation)  
32 are beyond the scope of this study and merit consideration.  
33  
34  
35

36 Researchers and planners can use data mining to optimise new tertiary care emergency  
37 services locations that maximise accessibility. Data mining could inform which existing  
38 institutions should be prioritised for an upgrade to improve accessibility or point at the optimal  
39 location for new ones, thus informing sound choices. These data are unique and provide an  
40 opportunity to enhance health services planning. Stakeholders and health equity advocates  
41 should encourage the integration of accessibility considerations in urban planning processes.  
42  
43  
44

45 Planners and service providers wishing to combat social injustices must examine this new  
46 evidence that distance and congestion combine to exclude the most vulnerable and  
47 socioeconomically disadvantaged from critical health services. Planners and service providers  
48 must then consider bringing services closer to these populations. This new evidence and  
49 approach raise opportunities to address inequities, improve indicators, and engage  
50 stakeholders in urban planning. Future studies will examine the impact of this approach. This  
51 evidence supports planning using travel time and monitoring accessibility and equity when  
52 assessing the quality of health services.[45–47]  
53  
54  
55  
56  
57  
58  
59  
60

1  
2  
3 This situational analysis is insufficient to drive change. Integrating evidence about accessibility  
4 and equity into stakeholder and intersectoral dialogues, decision-making processes and other  
5 strategies that seek the social appropriation of knowledge by stakeholders and sectors might be  
6 catalysts for implementation.[33,48]  
7  
8

9 This report is part of the broader AMORE Project. Future reports will explore the potential of  
10 optimising the location of up to two new emergency departments. Future studies will assess  
11 the use and appropriation of data, and the advocacy of stakeholders, including those in the  
12 AMORE Project Collaborative Group.[10,49]  
13  
14

15 Interactive platforms can help decision-makers explore different assumptions and myriads of  
16 other results of combining different thresholds and traffic levels, allowing data to speak for  
17 itself.[50,51]  
18  
19

20 Looking ahead, identifying and proposing public policy plans and partnerships could improve  
21 health equity and bring hope to residents of Cali. These measures could also reduce social  
22 injustices, including the burden of the inverse care law that vulnerable populations pay more to  
23 access essential health services.[4,52,53]  
24  
25

### 26 27 **Generalisability and applicability**

28 This study is reproducible in other settings with dynamic travel-time data (e.g., Waze or Google  
29 Maps) and georeferenced service and population data that make situational analyses  
30 accessible. Information accuracy depends on the accuracy of sources, the modelling used to  
31 conduct searches and maintaining data that is affordable and easy to interpret.  
32  
33

34 Travel times, infrastructure and populations change. Travel times and census data may thus  
35 need to be updated, and traffic clusters may need to be adjusted.  
36  
37

38 The proposed approach highlights the dynamic nature of travel times and uses TAZs to offer a  
39 granular assessment of the city. The scale of these assessments is suitable for informing short  
40 or long-term policies and plans and can be periodically revised as conditions change.  
41  
42

### 43 44 **Conclusions and future directions**

45 These results test an approach to provide a situational analysis. Defining potential  
46 improvements by adding services and using data by decision-makers and other stakeholders are  
47 part of the broader AMORE Project and the subject of future reports. Travel time is a  
48 continuous variable and could be the subject of myriad analyses beyond the purpose of this  
49 study. Our aim is to demonstrate the possibility of conducting an affordable situational analysis  
50 with existing data providing information that decision-makers and other stakeholders might  
51 use; something to be assessed in future studies.  
52  
53  
54  
55  
56  
57  
58  
59  
60



1  
2  
3 The web-based platform allows users to change assumptions or variables, explore different  
4 scenarios or perform sensitivity analyses. The possibilities are numerous and include expanding  
5 the study with more bivariate and multivariate analyses that go beyond the objectives of this  
6 report.  
7  
8

## 9 Ethical considerations

10  
11 This observational study on quality improvement for health services planning does not research  
12 human subjects. It integrates anonymised coded secondary data sources obtained from publicly  
13 available open records.[54,55] The Research Ethics Committee for the School of Engineering of  
14 the Universidad del Valle determined that the project is “without risk” per Colombian  
15 legislation and cleared the project (REF: CEIFI 010-2022). No identifiable private information  
16 was used in the study. Oversight of the project has been provided by the Doctoral Programme  
17 on Methodology of Biomedical Research and Public Health at the Department of Paediatrics,  
18 Obstetrics & Gynaecology and Preventative Medicine at the Universitat Autònoma de  
19 Barcelona. Contributors to this study are members of the AMORE Project Collaborative Group  
20 and public servants in their official capacity; they are listed in the acknowledgements.  
21  
22  
23

## 24 Contributors

25  
26 The corresponding author and principal investigator, Luis Gabriel Cuervo, led the project and  
27 manuscript writing and conceptualised the study with support from Daniel Cuervo and Ciro  
28 Jaramillo. Substantive additional contributions and editing of the report were provided by (in  
29 alphabetical order): María Olga Bula, Daniel Cuervo, Janet Hatcher-Roberts, Ciro Jaramillo  
30 Molina, Eliana Martínez-Herrera, Luis Fernando Pinilla, Felipe Piquero, and Lyda Osorio. All  
31 members of the AMORE Project Collaboration listed in **Table 4** provided comments, conceptual  
32 contributions, or consumer perspectives. Those listed approved the manuscript, declared they  
33 stood by this research report and approved being recognised as members of the AMORE  
34 Project Collaboration.  
35  
36  
37  
38  
39  
40

## 41 Funding

42 This study has not yet received external funding; costs have been covered by the principal  
43 investigator plus additional in-kind contributions by IQuartil SAS and Team33 as part of their  
44 training with the DS4A data science program. The principal investigator covered the costs  
45 associated with downloading big data and the labour costs of producing an advanced prototype  
46 of the AMORE Platform.  
47  
48  
49

## 50 Acknowledgments

51 We are grateful to Stephen Volante CT, an American Translators Association member, for his  
52 editing support and María Fernanda Merino for providing strategic guidance. IQuartil SAS has  
53 hosted the AMORE Platform, and we are incredibly grateful to Pablo Zapata and Lizardo  
54  
55  
56  
57  
58  
59  
60

Vanegas for improvements to the AMORE Platform and the AMORE Project website. The development of the AMORE Platform used for this study was led by Luis Gabriel Cuervo, Daniel Cuervo, Luis Fernando Pinilla, and Pablo Zapata. An early prototype of the AMORE Platform was developed under the guidance of the principal investigator (LGC) by Team 33 of the 2020 cohort of the Data Science for All – Correlation Once certificate training program. Members of Team 33 included Daniel Cuervo, Catherine Cabrera, Dario Mogollón, Juan G. Betancourt, Stephanie Rojas, Rafael Roper, and Santiago Tobar. This work has been carried out within the framework of the doctorate in Methodology of Biomedical Research and Public Health of the Universitat Autònoma de Barcelona.

*Table 4. Contributions by Members of the AMORE Project Collaboration approving the manuscript*

| Surname           | Given name      | Draft writing | Revision & comments | Conceptual contributions | User perspectives | Stands by manuscript | Approved final version |
|-------------------|-----------------|---------------|---------------------|--------------------------|-------------------|----------------------|------------------------|
| Agredo Lemos      | Freddy Enrique  |               | ●                   | ●                        | ●                 | ●                    | ●                      |
| Avila Rodriguez   | German          |               |                     |                          | ●                 | ●                    | ●                      |
| Bula              | María Olga      | ●             | ●                   | ●                        | ●                 | ●                    | ●                      |
|                   |                 |               |                     | ●                        | ●                 | ●                    | ●                      |
| Cuervo            | Daniel          | ●             | ●                   | ●                        |                   | ●                    | ●                      |
| Cuervo            | Luis Gabriel    | ●             | ●                   | ●                        |                   | ●                    | ●                      |
| Franco            | Oscar           |               |                     | ●                        |                   | ●                    | ●                      |
| Garcia            | Crhistian       |               |                     | ●                        | ●                 | ●                    | ●                      |
| Guerrero          | Rodrigo         |               | ●                   | ●                        | ●                 | ●                    | ●                      |
| Hatcher-Roberts   | Janet           | ●             | ●                   | ●                        |                   | ●                    | ●                      |
| Jaramillo         | Ciro            | ●             | ●                   | ●                        | ●                 | ●                    | ●                      |
| Martínez Arámbula | Fernando Rafael |               |                     | ●                        |                   | ●                    | ●                      |
| Martínez Herrera  | Eliana          | ●             | ●                   | ●                        | ●                 | ●                    | ●                      |
| Merino Juarez     | Maria Fernanda  |               | ●                   | ●                        |                   | ●                    | ●                      |
| Osorio            | Lyda            |               | ●                   | ●                        | ●                 | ●                    | ●                      |
| Ospina            | Maria B         |               |                     | ●                        | ●                 | ●                    | ●                      |
| Paredes           | Gabriel         | ●             |                     | ●                        |                   | ●                    | ●                      |
| Paredes-Zapata    | David           |               | ●                   | ●                        | ●                 | ●                    | ●                      |

|                  |                |   |   |   |   |   |   |
|------------------|----------------|---|---|---|---|---|---|
| Pinilla          | Luis Fernando  | ● | ● | ● | ● | ● | ● |
| Piquero          | Felipe         | ● | ● |   | ● | ● | ● |
| Rojas            | Oscar          |   | ● |   | ● | ● | ● |
| Rosero Hernández | Myriam         |   |   | ● |   | ● | ● |
| Tobar-Blandón    | Maria Fernanda |   | ● |   | ● | ● | ● |
| Zapata Murillo   | Pablo          |   |   | ● |   | ● | ● |

## Competing interests

All authors have completed the ICMJE uniform disclosure form and declare no financial support from any organisation for the submitted work. IQuartil SAS provided technical support to develop the AMORE Platform and was subsidised by the PI (LGC) for consulting services. DC is a partner at IQuartil SAS and a sibling to LGC. LFP gave technical support at IQuartil SAS until March 2021. LGC contributed to this work in his personal capacity and time. The views expressed in this article do not necessarily represent the decisions or policies of his employer, PAHO/WHO. Reproductions of this article should not include any suggestion that PAHO/WHO endorsed this research or is endorsing any specific organisation, services, or products. COI Declaration by other members of the AMORE Project Collaborative Group signing off the manuscript: FRMA is an engineer on roads and transportation who participated in his personal capacity and time; his contributions do not necessarily reflect the policies or decisions of his employer, the Municipality of Santiago de Cali. MFMJ participated in her personal capacity and time, and her contributions do not necessarily reflect the policies or decisions of her employer. PZM is a consultant at IQuartil SAS.

## Data availability statement

The data sources used in this study are in the public domain. The links to the sources are provided (see Study design), and the data constitutes a negligible risk to confidentiality; Colombia's census microdata was anonymised at the source. Neither Google Maps Distance Matrix API nor REPS include personal information (see Ethical considerations). Data from the AMORE Platform relevant to this publication will be made available after the publication of this manuscript at <https://www.iquartil.net/proyectoAMORE/>.

## References

- 1 Ma L, Luo N, Wan T, *et al*. An Improved Healthcare Accessibility Measure Considering the Temporal Dimension and Population Demand of Different Ages. *Int J Environ Res Public Health* 2018;**15**. doi:10.3390/ijerph15112421

- 1  
2  
3 2 Levesque J-F, Harris MF, Russell G. Patient-centred access to health care: conceptualising  
4 access at the interface of health systems and populations. *Int J Equity Health* 2013;**12**:18.  
5 doi:10.1186/1475-9276-12-18  
6
- 7  
8 3 Gao X, Kelley DW. Understanding how distance to facility and quality of care affect maternal  
9 health service utilization in Kenya and Haiti: A comparative geographic information system  
10 study. *Geospatial Health* 2019;**14**. doi:10.4081/gh.2019.690  
11
- 12  
13 4 Frenk J. The concept and measurement of accessibility. In: White K, ed. *Health Services*  
14 *Research: an anthology*. Washington DC: : Pan American Health Organization / World  
15 Health Organization 1992. 8–42855. [https://www.researchgate.net/profile/Julio-](https://www.researchgate.net/profile/Julio-Frenk/publication/19080047_Concept_and_measurement_of_accessibility/links/5575db2708ae75363751a314/Concept-and-measurement-of-accessibility.pdf)  
16 [Frenk/publication/19080047\\_Concept\\_and\\_measurement\\_of\\_accessibility/links/5575db27](https://www.researchgate.net/profile/Julio-Frenk/publication/19080047_Concept_and_measurement_of_accessibility/links/5575db2708ae75363751a314/Concept-and-measurement-of-accessibility.pdf)  
17 [08ae75363751a314/Concept-and-measurement-of-accessibility.pdf](https://www.researchgate.net/profile/Julio-Frenk/publication/19080047_Concept_and_measurement_of_accessibility/links/5575db2708ae75363751a314/Concept-and-measurement-of-accessibility.pdf)  
18
- 19  
20 5 Wang F. Measurement, Optimization, and Impact of Health Care Accessibility: A  
21 Methodological Review. *Ann Assoc Am Geogr* 2012;**102**:1104–12.  
22 doi:10.1080/00045608.2012.657146  
23
- 24  
25 6 Páez A, Scott DM, Morency C. Measuring accessibility: positive and normative  
26 implementations of various accessibility indicators. *J Transp Geogr* 2012;**25**:141–53.  
27 doi:10.1016/j.jtrangeo.2012.03.016  
28
- 29  
30 7 Bureau of Transportation Statistics. Transportation Statistics Annual Report 1997: mobility  
31 and access. US Department of Transportation 1997.  
32 [https://www.bts.dot.gov/archive/publications/transportation\\_statistics\\_annual\\_report/199](https://www.bts.dot.gov/archive/publications/transportation_statistics_annual_report/1997/index)  
33 [7/index](https://www.bts.dot.gov/archive/publications/transportation_statistics_annual_report/1997/index)  
34
- 35  
36 8 Moya-Gómez B, Salas-Olmedo MH, García-Palomares J, *et al*. Dynamic Accessibility using Big  
37 Data: The Role of the Changing Conditions of Network Congestion and Destination  
38 Attractiveness. *Netw Spat Econ* 2018;**18**. doi:10.1007/s11067-017-9348-z  
39
- 40  
41 9 McCollum R, Taegtmeier M, Otiso L, *et al*. Healthcare equity analysis: applying the Tanahashi  
42 model of health service coverage to community health systems following devolution in  
43 Kenya. *Int J Equity Health* 2019;**18**:65. doi:10.1186/s12939-019-0967-5  
44
- 45  
46 10 Cuervo LG, Martínez-Herrera E, Cuervo D, *et al*. Improving equity using dynamic geographic  
47 accessibility data for urban health services planning. *Gac Sanit* Published Online First: 11  
48 June 2022. doi:10.1016/j.gaceta.2022.05.001  
49
- 50  
51 11 Kong X, Liu Y, Wang Y, *et al*. Investigating Public Facility Characteristics from a Spatial  
52 Interaction Perspective: A Case Study of Beijing Hospitals Using Taxi Data. *ISPRS Int J Geo-Inf*  
53 2017;**6**:38. doi:10.3390/ijgi6020038  
54
- 55  
56 12 Neutens T. Accessibility, equity and health care: review and research directions for  
57 transport geographers. *J Transp Geogr* 2015;**43**:14–27. doi:10.1016/j.jtrangeo.2014.12.006  
58  
59

- 13 Unión Temporal UT SDG-CNC. Encuesta de movilidad de hogares Cali 2015: Producto 3. Ámbito y zonificación. 2015. <https://www.metrocali.gov.co/wp/wp-content/uploads/2019/02/Encuesta-de-movilidad-2015.pdf> (accessed 30 May 2020).
- 14 Crítica Urbana. Comprender para transformar, entrevista a Oriol Nel-lo. 2018. <https://youtu.be/AHw6F72HqGQ> (accessed 17 Aug 2020).
- 15 Acosta A. Smart Cities & Inequidad: *Forbes Repúb Dominic* 2021;**82**:12. [https://issuu.com/forbeslatam/docs/forbes\\_rd\\_julio\\_/12](https://issuu.com/forbeslatam/docs/forbes_rd_julio_/12) (accessed 17 Jul 2021).
- 16 Wang J, Du F, Huang J, *et al.* Access to hospitals: Potential vs. observed. *Cities* 2020;**100**:102671. doi:10.1016/j.cities.2020.102671
- 17 Śleszyński P, Olszewski P, Dybicz T, *et al.* The ideal isochrone: Assessing the efficiency of transport systems. *Res Transp Bus Manag* 2022;**100**:100779. doi:10.1016/j.rtbm.2021.100779
- 18 Whitty CJM. What makes an academic paper useful for health policy? *BMC Med* 2015;**13**:301. doi:10.1186/s12916-015-0544-8
- 19 Tiempo CEE. ¡Atención, Cali! Así será la cuarentena hasta el 15 de junio. El Tiempo. 2020. <https://www.eltiempo.com/colombia/cali/como-sera-la-cuarentena-en-cali-hasta-el-15-de-junio-y-cuales-son-las-medidas-501404> (accessed 7 Nov 2021).
- 20 Cuarentena en Cali: ¿continúa la Ley Seca y el toque de queda con la extensión? Colomb. 2020. [https://colombia.as.com/colombia/2020/08/02/actualidad/1596387072\\_578129.html](https://colombia.as.com/colombia/2020/08/02/actualidad/1596387072_578129.html) (accessed 7 Nov 2021).
- 21 Colombia mantiene cuarentena hasta el 30 de noviembre. Temas Colomb. 2020. <https://temascolombia.com/colombia-mantiene-cuarentena-hasta-el-30-de-noviembre/> (accessed 7 Nov 2021).
- 22 Dirección de Censos y Demografía - DCD,, Departamento Administrativo Nacional de Estadística - DANE. COLOMBIA - Censo Nacional de Población y Vivienda - CNPV - 2018. Bogotá: : Departamento Administrativo Nacional de Estadística - DANE 2020. <http://microdatos.dane.gov.co/index.php/catalog/643/study-description>
- 23 DANE. Información técnica y omisión censal 2018, aspectos conceptuales y metodológicos. 2019. <https://www.dane.gov.co/index.php/estadisticas-por-tema/demografia-y-poblacion/censo-nacional-de-poblacion-y-vivenda-2018/informacion-tecnica> (accessed 10 Sep 2020).
- 24 DANE, Sistema Estadístico Nacional - SEN. Información del DANE para la toma de decisiones regionales: Cali - Valle del Cauca. Colombia - Cali: : DANE 2021. <https://www.dane.gov.co/index.php/estadisticas-por-tema/informacion-regional/informacion-estadistica-desagregada-con-enfoque-territorial-y->

- diferencial/informacion-del-dane-para-la-toma-de-decisiones-en-departamentos-y-ciudades-capitales (accessed 24 Apr 2021).
- 25 Cali emerges as epicentre of unrest in ongoing Colombia protests | Protests News | Al Jazeera. <https://www.aljazeera.com/news/2021/5/11/cali-emerges-as-epicentre-of-colombias-ongoing-unrest> (accessed 11 Oct 2021).
- 26 Colombia protests: UN calls for investigation into Cali deaths. BBC News. 2021. <https://www.bbc.com/news/world-latin-america-57300639> (accessed 9 Jan 2022).
- 27 Cali Distrito se moverá entre siete y ocho localidades. <http://www.cali.gov.co/publicaciones/146733/cali-distrito-se-movera-entre-siete-y-ocho-localidades/> (accessed 24 Apr 2021).
- 28 Cali Distrito Especial tendría seis localidades. <http://www.cali.gov.co/publicaciones/148406/cali-distrito-especial-tendria-seis-localidades/> (accessed 31 Mar 2021).
- 29 Google Maps. Location of emergency departments of high-complexity hospitals in Cali, Colombia, 2021. 2021. <https://tinyurl.com/445fcyz> (accessed 25 Sep 2021).
- 30 Mapas de Comunas. [http://www.cali.gov.co/publicaciones/115924/mapas\\_comunas\\_idesc/](http://www.cali.gov.co/publicaciones/115924/mapas_comunas_idesc/) (accessed 30 May 2020).
- 31 Distance Matrix API – APIs & Services – Google Cloud Platform. <https://console.cloud.google.com/apis/library/distance-matrix-backend.googleapis.com?filter=solution-type:service&filter=visibility:public&filter=category:maps&id=82aa0d98-49bb-4855-9da9-efde390a3834&folder=true&organizationId=true&supportedpurview=project> (accessed 22 Jul 2020).
- 32 Abimbola S. Beyond positive a priori bias: reframing community engagement in LMICs. *Health Promot Int* 2020;**35**:598–609. doi:10.1093/heapro/daz023
- 33 Jull J, Giles A, Graham ID. Community-based participatory research and integrated knowledge translation: advancing the co-creation of knowledge. *Implement Sci* 2017;**12**:150. doi:10.1186/s13012-017-0696-3
- 34 O’Neill J, Tabish H, Welch V, *et al.* Applying an equity lens to interventions: using PROGRESS ensures consideration of socially stratifying factors to illuminate inequities in health. *J Clin Epidemiol* 2014;**67**:56–64. doi:10.1016/j.jclinepi.2013.08.005
- 35 Censo Nacional de Población y Vivienda 2018. <https://www.dane.gov.co/index.php/estadisticas-por-tema/demografia-y-poblacion/censo-nacional-de-poblacion-y-vivenda-2018> (accessed 23 Jul 2020).



- 1  
2  
3 36 DANE. Proyecciones de población. 2020. <https://www.dane.gov.co/index.php/estadisticas-por-tema/demografia-y-poblacion/proyecciones-de-poblacion> (accessed 16 Jun 2022).
- 4  
5  
6  
7 37 DANE, Sistema Estadístico Nacional - SEN. Información del DANE para la toma de decisiones de las ciudades capitales: Cali - Valle del Cauca. Colombia - Cali: : DANE 2020. <https://www.dane.gov.co/index.php/estadisticas-por-tema/informacion-regional/informacion-estadistica-desagregada-con-enfoque-territorial-y-diferencial/informacion-del-dane-para-la-toma-de-decisiones-en-departamentos-y-ciudades-capitales> (accessed 24 Apr 2021).
- 8  
9  
10  
11  
12  
13  
14  
15 38 Cantillo V, Ortúzar J de D. Restricting the use of cars by license plate numbers: A misguided urban transport policy. *DYNA* 2014;**81**:75–82. doi:10.15446/dyna.v81n188.40081
- 16  
17  
18 39 Broccoli MC, Moresky R, Dixon J, *et al.* Defining quality indicators for emergency care delivery: findings of an expert consensus process by emergency care practitioners in Africa. *BMJ Glob Health* 2018;**3**:e000479. doi:10.1136/bmjgh-2017-000479
- 19  
20  
21  
22  
23 40 Aringhieri R, Bruni ME, Khodaparasti S, *et al.* Emergency medical services and beyond: Addressing new challenges through a wide literature review. *Comput Oper Res* 2017;**78**:349–68. doi:10.1016/j.cor.2016.09.016
- 24  
25  
26  
27  
28 41 Karrison TG, Philip Schumm L, Kocherginsky M, *et al.* Effects of driving distance and transport time on mortality among Level I and II traumas occurring in a metropolitan area. *J Trauma Acute Care Surg* 2018;**85**:756–65. doi:10.1097/TA.0000000000002041
- 29  
30  
31  
32 42 Kavanagh J, Oliver S, Lorenc T. Reflections on developing and using PROGRESS-Plus. *Equity Update* 2008;**2**:1–3. [https://www.researchgate.net/publication/285979865\\_Reflections\\_on\\_developing\\_and\\_using\\_PROGRESS-Plus/citation/download](https://www.researchgate.net/publication/285979865_Reflections_on_developing_and_using_PROGRESS-Plus/citation/download)
- 33  
34  
35  
36  
37  
38 43 PROGRESS-Plus | Cochrane Equity. <https://methods.cochrane.org/equity/projects/evidence-equity/progress-plus> (accessed 23 Mar 2020).
- 39  
40  
41  
42  
43 44 STROBE-Equity. <https://methods.cochrane.org/equity/projects/strobe-equity> (accessed 12 Jan 2022).
- 44  
45  
46 45 Sa TH de, Mwaura A, Vert C, *et al.* Urban design is key to healthy environments for all. *Lancet Glob Health* 2022;**10**:e786–7. doi:10.1016/S2214-109X(22)00202-9
- 47  
48  
49  
50 46 Giles-Corti B, Moudon AV, Lowe M, *et al.* Creating healthy and sustainable cities: what gets measured, gets done. *Lancet Glob Health* 2022;**10**:e782–5. doi:10.1016/S2214-109X(22)00070-5
- 51  
52  
53  
54  
55  
56  
57  
58  
59  
60



- 1  
2  
3 47 Aaronson EL, Marsh RH, Guha M, *et al.* Emergency department quality and safety indicators  
4 in resource-limited settings: an environmental survey. *Int J Emerg Med* 2015;**8**:39.  
5 doi:10.1186/s12245-015-0088-x  
6  
7  
8 48 Boyko JA, Lavis JN, Dobbins M. Deliberative Dialogues as a Strategy for System-Level  
9 Knowledge Translation and Exchange. *Healthc Policy* 2014;**9**:122–  
10 31. <https://www.ncbi.nlm.nih.gov/pmc/articles/PMC4749889/> (accessed 10 Oct 2020).  
11  
12 49 Cuervo LG. AMORE Project - to improve health equity by reducing the travel time to  
13 essential health services. Bethesda, MD, USA: 2021. [https://youtu.be/\\_cDMAULJMTc](https://youtu.be/_cDMAULJMTc)  
14 (accessed 23 Sep 2021).  
15  
16  
17 50 Whitty CJM. What makes an academic paper useful for health policy? *BMC Med*  
18 2015;**13**:301. doi:10.1186/s12916-015-0544-8  
19  
20  
21 51 Armstrong K. Big data: a revolution that will transform how we live, work, and think. *Inf*  
22 *Commun Soc* 2014;**17**:1300–2. doi:10.1080/1369118X.2014.923482  
23  
24 52 Fiscella K, Shin P. The Inverse Care Law: Implications for Healthcare of Vulnerable  
25 Populations. *J Ambulatory Care Manage* 2005;**28**:304–  
26 12. [https://journals.lww.com/ambulatorycaremanagement/Abstract/2005/10000/The\\_Inve](https://journals.lww.com/ambulatorycaremanagement/Abstract/2005/10000/The_Inverse_Care_Law__Implications_for_Healthcare.5.aspx)  
27 [rse\\_Care\\_Law\\_\\_Implications\\_for\\_Healthcare.5.aspx](https://journals.lww.com/ambulatorycaremanagement/Abstract/2005/10000/The_Inverse_Care_Law__Implications_for_Healthcare.5.aspx) (accessed 28 Mar 2021).  
28  
29  
30 53 Hart JT. The inverse care law. *The Lancet* 1971;**297**:405–12. doi:10.1016/S0140-  
31 6736(71)92410-X  
32  
33  
34 54 Ministerio de Salud. Resolución 8430 de 1993: Normas científicas, técnicas y administrativas  
35 para la investigación en salud.  
36 1993. [https://www.minsalud.gov.co/sites/rid/Lists/BibliotecaDigital/RIDE/DE/DIJ/RESOLUCI](https://www.minsalud.gov.co/sites/rid/Lists/BibliotecaDigital/RIDE/DE/DIJ/RESOLUCION-8430-DE-1993.pdf)  
37 [ON-8430-DE-1993.pdf](https://www.minsalud.gov.co/sites/rid/Lists/BibliotecaDigital/RIDE/DE/DIJ/RESOLUCION-8430-DE-1993.pdf)  
38  
39 55 World Health Organization, Council for International Organizations of Medical Sciences.  
40 *International ethical guidelines for health-related research involving humans*. Geneva: :  
41 CIOMS 2017. [https://www.who.int/docs/default-source/ethics/web-cioms-](https://www.who.int/docs/default-source/ethics/web-cioms-ethicalguidelines.pdf?sfvrsn=f62ee074_0)  
42 [ethicalguidelines.pdf?sfvrsn=f62ee074\\_0](https://www.who.int/docs/default-source/ethics/web-cioms-ethicalguidelines.pdf?sfvrsn=f62ee074_0)  
43  
44  
45  
46  
47  
48  
49  
50  
51  
52  
53  
54  
55  
56  
57  
58  
59  
60

1  
2  
3 *Figure 1. AMORE Platform situational analysis*

4  
5 *Figure 2. Situational analysis, filters and visualisations, Nov 2020*

6  
7 *Figure 3. Travel-time clusters from free-flow to peak traffic, by time and day.*

8  
9 *Figure 4. Accessibility by income to tertiary care comparing July and November 2020*

10  
11 *Figure 5. Accessibility by sociodemographic characteristics in July and November 2020*

12  
13 *Figure 6. Impact of traffic congestion on accessibility, by economic stratum, July 2020*

14  
15 *Figure 7. Location of the Palenque people*

16  
17 *Supplemental File 1. Tertiary care emergency departments in institutions with intensive care and surgery, ordered as*  
18 *displayed in REPS[29]*

19  
20 *Supplemental File 2. Travel times and population density, tertiary care institutions, peak traffic, November 2020*

21  
22 *Supplemental File 3. Travel times by auto to the nearest emergency, with peak traffic, July 2020*

1  
2  
3  
4  
5  
6  
7  
8  
9  
10  
11  
12  
13  
14  
15  
16  
17  
18  
19  
20  
21  
22  
23  
24  
25  
26  
27  
28  
29  
30  
31  
32  
33  
34  
35  
36  
37  
38  
39  
40  
41  
42  
43  
44  
45  
46  
47  
48  
49  
50  
51  
52  
53  
54  
55  
56  
57  
58  
59  
60



Figure 1, AMORE Platform situational analysis

338x190mm (222 x 222 DPI)

1  
2  
3  
4  
5  
6  
7  
8  
9  
10  
11  
12  
13  
14  
15  
16  
17  
18  
19  
20  
21  
22  
23  
24  
25  
26  
27  
28  
29  
30  
31  
32  
33  
34  
35  
36  
37  
38  
39  
40  
41  
42  
43  
44  
45  
46  
47  
48  
49  
50  
51  
52  
53  
54  
55  
56  
57  
58  
59  
60

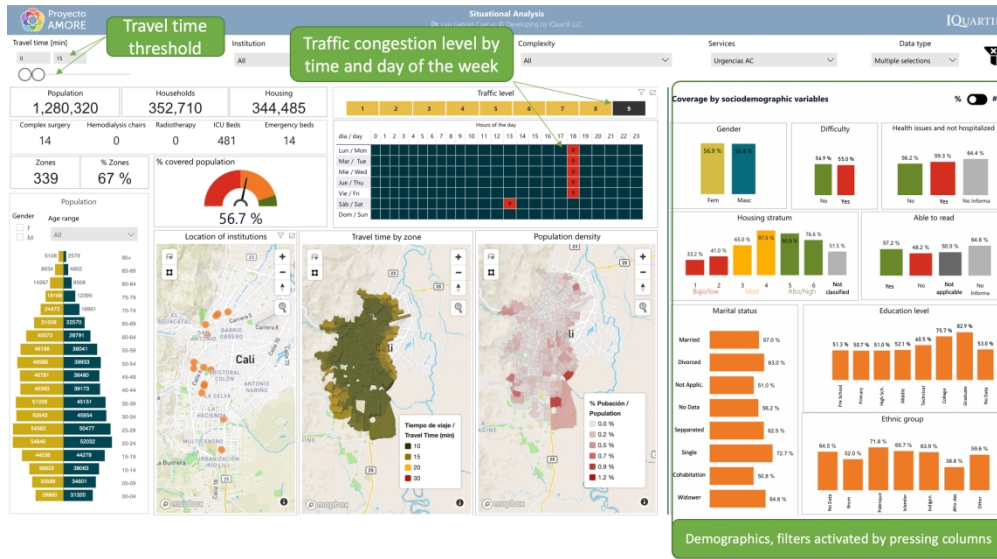

Figure 2, Situational analysis, filters and visualizations, Nov 2020

338x190mm (222 x 222 DPI)

1  
2  
3  
4  
5  
6  
7  
8  
9  
10  
11  
12  
13  
14  
15  
16  
17  
18  
19  
20  
21  
22  
23  
24  
25  
26  
27  
28  
29  
30  
31  
32  
33  
34  
35  
36  
37  
38  
39  
40  
41  
42  
43  
44  
45  
46  
47  
48  
49  
50  
51  
52  
53  
54  
55  
56  
57  
58  
59  
60



Figure 3, Travel-time clusters from free flow to peak traffic, by time and day  
337x99mm (221 x 222 DPI)



Figure 4, Accessibility by income to tertiary care comparing July and November 2020

284x186mm (222 x 222 DPI)



Figure 5, Accessibility by sociodemographic characteristics in July and November 2020

338x190mm (222 x 222 DPI)



Impact of traffic congestion on accessibility to tertiary care emergencies, by economic stratum of the dwelling

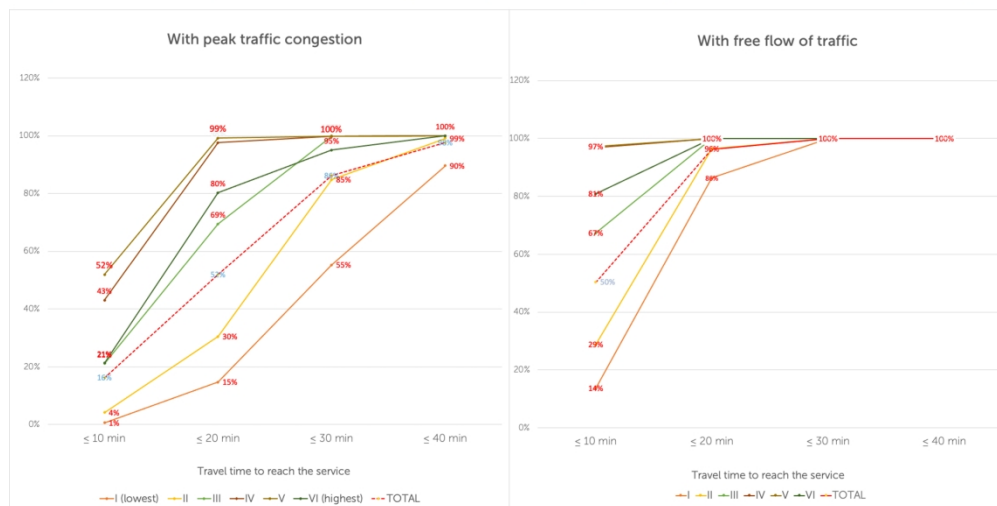

Figure 6 Impact of traffic congestion on accessibility, by economic stratum, July 2020

338x190mm (600 x 600 DPI)

1  
2  
3  
4  
5  
6  
7  
8  
9  
10  
11  
12  
13  
14  
15  
16  
17  
18  
19  
20  
21  
22  
23  
24  
25  
26  
27  
28  
29  
30  
31  
32  
33  
34  
35  
36  
37  
38  
39  
40  
41  
42  
43  
44  
45  
46  
47  
48  
49  
50  
51  
52  
53  
54  
55  
56  
57  
58  
59  
60



Figure 7, Location of the Palenque people

188x314mm (72 x 72 DPI)

1  
2  
3  
4  
5  
6  
7  
8  
9  
10  
11  
12  
13  
14  
15  
16  
17  
18  
19  
20  
21  
22  
23  
24  
25  
26  
27  
28  
29  
30  
31  
32  
33  
34  
35  
36  
37  
38  
39  
40  
41  
42  
43  
44  
45  
46  
47  
48  
49  
50  
51  
52  
53  
54  
55  
56  
57  
58  
59  
60



| <b>Institution</b>                                             |
|----------------------------------------------------------------|
| <b>Centro Médico Imbanaco</b>                                  |
| <b>Clínica Amiga</b>                                           |
| <b>Clínica Colombia ES</b>                                     |
| <b>Clínica Colsanitas S.A. Sebastián de Belalcázar</b>         |
| <b>Clínica de Occidente</b>                                    |
| <b>Clínica Esensa</b>                                          |
| <b>Clínica Farallones S.A.</b>                                 |
| <b>Clínica Nuestra</b>                                         |
| <b>Clínica Nuestra Señora de los Remedios</b>                  |
| <b>Clínica Nueva de Cali SAS Sede La Quinta</b>                |
| <b>Clínica Rey David</b>                                       |
| <b>DIME Clínica Neurocardiovascular S.A.</b>                   |
| <b>Hospital Universitario del Valle Evaristo García E.S.E.</b> |
| <b>Fundación Valle de Lili</b>                                 |

228x168mm (81 x 81 DPI)

1  
2  
3  
4  
5  
6  
7  
8  
9  
10  
11  
12  
13  
14  
15  
16  
17  
18  
19  
20  
21  
22  
23  
24  
25  
26  
27  
28  
29  
30  
31  
32  
33  
34  
35  
36  
37  
38  
39  
40  
41  
42  
43  
44  
45  
46  
47  
48  
49  
50  
51  
52  
53  
54  
55  
56  
57  
58  
59  
60



338x123mm (81 x 81 DPI)



## Cross-sectional equity analysis of accessibility by automobile to tertiary care emergency services in Cali, Colombia in 2020

STROBE Statement—Checklist of items that should be included in reports of *cross-sectional studies*

|                           | Item No | Recommendation                                                                                                                                                                                       | Page No   |
|---------------------------|---------|------------------------------------------------------------------------------------------------------------------------------------------------------------------------------------------------------|-----------|
| <b>Title and abstract</b> | 1       | (a) Indicate the study's design with a commonly used term in the title or the abstract                                                                                                               | 1         |
|                           |         | (b) Provide in the abstract an informative and balanced summary of what was done and what was found                                                                                                  | 1         |
| <b>Introduction</b>       |         |                                                                                                                                                                                                      |           |
| Background/rationale      | 2       | Explain the scientific background and rationale for the investigation being reported                                                                                                                 | 2         |
| Objectives                | 3       | State specific objectives, including any prespecified hypotheses                                                                                                                                     | 3         |
| <b>Methods</b>            |         |                                                                                                                                                                                                      |           |
| Study design              | 4       | Present key elements of study design early in the paper                                                                                                                                              | 4         |
| Setting                   | 5       | Describe the setting, locations, and relevant dates, including periods of recruitment, exposure, follow-up, and data collection                                                                      | 3         |
| Participants              | 6       | (a) Give the eligibility criteria, and the sources and methods of selection of participants                                                                                                          | 5         |
| Variables                 | 7       | Clearly define all outcomes, exposures, predictors, potential confounders, and effect modifiers. Give diagnostic criteria, if applicable                                                             | 6         |
| Data sources/measurement  | 8*      | For each variable of interest, give sources of data and details of methods of assessment (measurement). Describe comparability of assessment methods if there is more than one group                 | 5         |
| Bias                      | 9       | Describe any efforts to address potential sources of bias                                                                                                                                            | 7         |
| Study size                | 10      | Explain how the study size was arrived at                                                                                                                                                            | 3,9       |
| Quantitative variables    | 11      | Explain how quantitative variables were handled in the analyses. If applicable, describe which groupings were chosen and why                                                                         | 9- 12     |
| Statistical methods       | 12      | (a) Describe all statistical methods, including those used to control for confounding                                                                                                                | 5, 10     |
|                           |         | (b) Describe any methods used to examine subgroups and interactions                                                                                                                                  | 5, 10     |
|                           |         | (c) Explain how missing data were addressed                                                                                                                                                          | 7, 10, 11 |
|                           |         | (d) If applicable, describe analytical methods taking account of sampling strategy                                                                                                                   |           |
|                           |         | (e) Describe any sensitivity analyses                                                                                                                                                                |           |
| <b>Results</b>            |         |                                                                                                                                                                                                      |           |
| Participants              | 13*     | (a) Report numbers of individuals at each stage of study—e.g., numbers potentially eligible, examined for eligibility, confirmed eligible, included in the study, completing follow-up, and analyzed | 11        |
|                           |         | (b) Give reasons for non-participation at each stage                                                                                                                                                 | 6-7       |
|                           |         | (c) Consider use of a flow diagram                                                                                                                                                                   |           |
| Descriptive data          | 14*     | (a) Give characteristics of study participants (e.g., demographic, clinical, social) and information on exposures and potential confounders                                                          | 9-11      |
|                           |         | (b) Indicate number of participants with missing data for each variable of interest                                                                                                                  | 11        |
| Outcome data              | 15*     | Report numbers of outcome events or summary measures                                                                                                                                                 | 8-11      |

## Cross-sectional equity analysis of accessibility by automobile to tertiary care emergency services in Cali, Colombia in 2020

|                          |    |                                                                                                                                                                                                                |       |
|--------------------------|----|----------------------------------------------------------------------------------------------------------------------------------------------------------------------------------------------------------------|-------|
| Main results             | 16 | (a) Give unadjusted estimates and, if applicable, confounder-adjusted estimates and their precision (e.g., 95% confidence interval). Make clear which confounders were adjusted for and why they were included | 11    |
|                          |    | (b) Report category boundaries when continuous variables were categorized                                                                                                                                      | 7, 11 |
|                          |    | (c) If relevant, consider translating estimates of relative risk into absolute risk for a meaningful time period                                                                                               |       |
| Other analyses           | 17 | Report other analyses done—e.g., analyses of subgroups and interactions, and sensitivity analyses                                                                                                              | 10    |
| <b>Discussion</b>        |    |                                                                                                                                                                                                                |       |
| Key results              | 18 | Summarize key results with reference to study objectives                                                                                                                                                       | 11    |
| Limitations              | 19 | Discuss limitations of the study, taking into account sources of potential bias or imprecision. Discuss both direction and magnitude of any potential bias                                                     | 13    |
| Interpretation           | 20 | Give a cautious overall interpretation of results considering objectives, limitations, multiplicity of analyses, results from similar studies, and other relevant evidence                                     | 13    |
| Generalizability         | 21 | Discuss the generalizability (external validity) of the study results                                                                                                                                          | 15    |
| <b>Other information</b> |    |                                                                                                                                                                                                                |       |
| Funding                  | 22 | Give the source of funding and the role of the funders for the present study and, if applicable, for the original study on which the present article is based                                                  | 16    |

\*Give information separately for exposed and unexposed groups.
