# Supplementary material for: Dynamic accessibility by car to tertiary care emergency services in Cali, Colombia, in 2020: cross-sectional equity analyses using travel time big data from a Google API
Source: HighWire-hosted journal article supplement (doi:10.1136/bmjopen-2022-062178), 2022-09-01

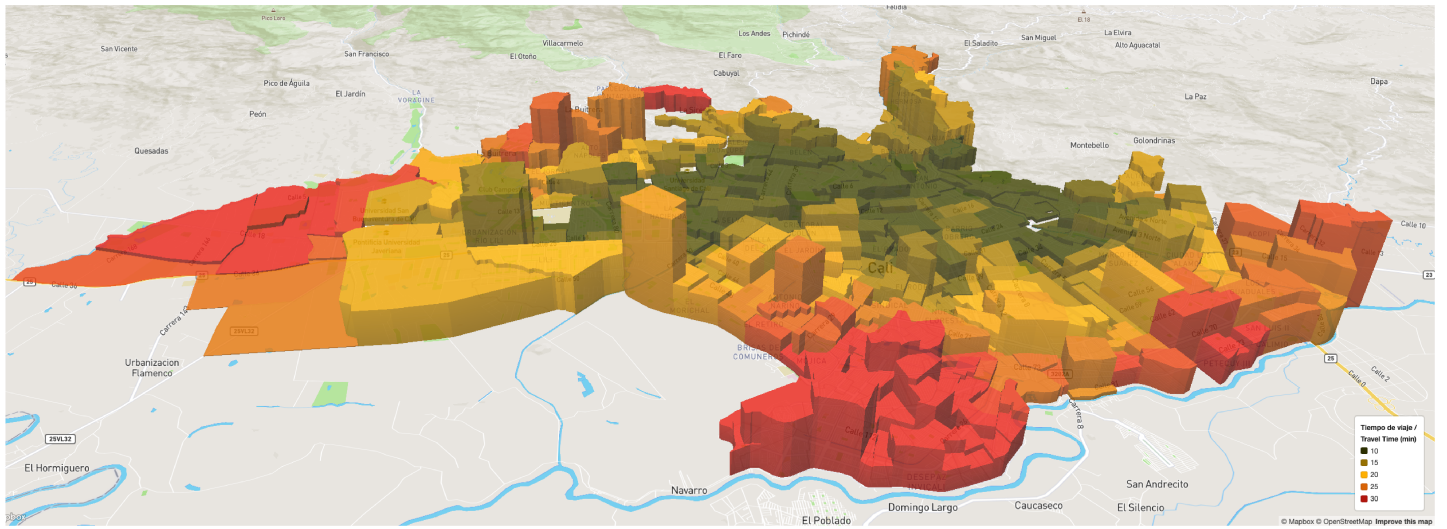

Supplement: bmjopen-2022-062178supp003_data_supplement.pdf [file bmjopen-2022-062178supp003_data_supplement.pdf]
